# Supplementary material for: Detecting hospital behaviors of up-coding on DRGs using Rasch model of continuous variables and online cloud computing in Taiwan
Source: BMC Health Serv Res. 2019 Sep 4;19:630. doi: 10.1186/s12913-019-4417-2 (PMC6727501; doi:10.1186/s12913-019-4417-2)
Supplement: Supplementary file 1 — Study dataset. (XLSX 1030 kb) [file 12913_2019_4417_MOESM1_ESM.xlsx]

## Sheet: 工作表1
Date	Twdrgs	Diagnosis	Room	Diet	exxamine	x-ray	treatment	operation	rehabilitation	Blood	Hmo	annesiology	material	drug	administration	psychiatry	injection	baby	total fees	partially paid	aplication fee
1050522	08801	5,642	5,730	0	5,063	240	4,780	0	0	0	0	0	320	3,754	927	0	225	0	26,681	2,668	24,013
1050520	320	5,286	12,100	0	5,899	480	3,030	0	0	0	0	0	473	6,150	1,059	0	300	0	34,777	3,478	31,299
1050507	21701	11,169	14,052	0	9,943	480	10,060	38,928	0	1,320	0	0	2,084	35,192	2,247	0	675	0	126,150	0	126,150
1050527	320	2,815	2,592	0	6,100	440	210	0	0	0	0	0	189	1,314	399	0	150	0	14,209	1,421	12,788
1050529	182	1,742	2,360	0	2,851	480	210	0	0	0	0	0	90	254	223	0	75	0	8,285	829	7,456
1050524	089	5,196	9,440	0	7,386	890	4,360	0	320	0	16,400	0	227	2,596	751	0	300	0	47,866	0	47,866
1050527	17603	2,448	5,020	0	6,372	240	360	0	0	1,320	0	0	223	2,426	399	0	150	0	18,958	1,896	17,062
1050528	420	2,641	4,720	0	3,666	4,800	300	0	0	0	0	0	122	4,233	399	0	150	0	21,031	2,103	18,928
1050527	089	2,815	5,020	0	2,624	440	1,604	0	0	0	0	0	217	2,434	487	0	180	0	15,821	1,582	14,239
1050511	24901	10,816	13,179	1,460	12,974	17,982	15,952	0	0	6,975	0	0	1,132	37,281	2,112	0	555	0	120,418	12,042	108,376
1050530	278	2,288	3,840	0	1,998	240	210	0	0	0	0	0	202	2,934	399	0	180	0	12,291	1,229	11,062
1050526	320	4,169	8,260	0	4,379	480	570	0	0	0	0	0	327	1,820	751	0	225	0	20,981	2,098	18,883
1050530	20201	2,448	2,292	0	6,152	480	1,260	0	0	0	0	0	179	763	399	0	150	0	14,123	1,412	12,711
1050602	08003	2,037	2,360	0	3,078	240	120	0	0	0	0	0	166	802	223	0	75	0	9,101	0	9,101
1050602	12301	1,893	1,180	0	8,487	7,386	1,935	0	0	0	0	0	642	593	223	0	225	0	22,564	0	22,564
1050529	321	2,801	5,900	1,560	5,545	4,800	2,746	0	0	0	0	0	365	1,254	487	0	225	0	25,683	2,568	23,115
1050523	41601	6,754	6,030	3,510	9,992	5,200	13,571	0	0	0	0	0	606	5,852	1,015	0	330	0	52,860	0	52,860
1050526	090	3,997	9,440	0	4,746	440	1,080	0	0	1,320	0	0	433	10,387	839	0	300	0	32,982	0	32,982
1050601	278	2,757	1,719	0	2,028	240	180	0	0	0	0	0	111	9,318	311	0	150	0	16,814	1,681	15,133
1050523	278	5,846	6,603	0	4,909	1,104	630	0	0	0	0	0	675	18,902	1,015	0	405	0	40,089	0	40,089
1050530	277	3,549	2,019	0	2,984	240	556	0	0	0	0	0	231	2,316	399	0	105	0	12,399	1,240	11,159
1050522	08002	5,992	15,640	0	5,837	840	3,630	0	0	0	0	0	462	20,343	1,191	0	375	0	54,310	5,431	48,879
1050530	035	3,902	2,865	0	7,666	5,160	2,935	0	0	0	0	0	231	2,125	487	0	150	0	25,521	2,552	22,969
1050531	08002	3,877	5,900	0	2,173	440	480	0	0	0	0	0	361	1,276	528	0	150	0	15,185	1,519	13,666
1050527	320	4,594	4,338	0	5,938	480	1,489	0	0	0	0	0	374	7,802	663	1,031	225	0	26,934	2,693	24,241
1050522	207	5,992	15,640	0	5,680	7,202	23,603	0	0	0	0	0	440	10,684	1,279	0	375	0	70,895	7,090	63,805
1050515	41601	8,096	23,900	7,410	12,174	440	20,438	0	0	1,320	0	0	915	31,412	1,895	0	600	0	108,600	10,860	97,740
1050530	090	3,714	7,080	0	3,358	440	540	0	0	0	0	0	139	6,561	575	0	225	0	22,632	2,263	20,369
1050601	208	3,182	4,720	0	3,140	12,146	1,002	0	0	0	0	0	3,439	2,668	399	0	150	0	30,846	3,085	27,761
1050602	321	2,757	3,840	0	3,689	240	270	0	0	0	0	0	145	1,244	399	0	150	0	12,734	1,273	11,461
1050530	321	3,863	6,200	1,510	4,314	240	2,014	0	0	0	0	0	269	2,420	619	0	225	0	21,674	2,167	19,507
1050601	YYY	3,305	5,900	0	8,571	240	4,252	0	0	7,960	8,200	0	275	5,011	528	0	300	0	44,542	0	44,542
1050604	178	1,742	2,660	0	6,959	240	317	0	0	2,640	0	0	263	2,781	311	0	75	0	17,988	0	17,988
1050527	20401	4,908	5,457	0	7,363	7,442	450	0	0	0	0	0	751	3,613	971	0	600	0	31,555	3,156	28,399
1050528	320	4,922	10,920	2,720	3,781	440	9,666	0	0	0	0	0	522	7,897	927	0	330	0	42,125	4,213	37,912
1050531	321	4,216	8,260	0	5,399	4,800	510	0	1,520	0	0	0	638	1,995	704	0	225	0	28,267	2,827	25,440
1050603	277	2,288	3,840	0	4,920	240	304	0	0	0	8,200	0	194	1,919	399	0	150	0	22,454	0	22,454
1050531	35001	3,154	7,380	0	2,961	240	4,068	0	0	0	0	0	204	3,281	663	0	255	0	22,206	2,221	19,985
1050526	089	5,790	5,784	2,730	5,661	680	8,510	0	0	0	0	0	794	8,783	971	0	300	0	40,003	0	40,003
1050604	183	1,935	2,660	0	577	0	120	0	0	0	0	0	123	2,358	311	0	150	0	8,234	823	7,411
1050530	277	4,689	4,011	0	9,417	240	4,850	0	0	0	12,300	0	555	4,942	704	0	255	0	41,963	0	41,963
1050515	07903	9,903	12,633	0	4,388	640	18,170	0	0	0	0	0	810	18,331	2,027	0	600	0	67,502	0	67,502
1050530	320	4,580	10,620	3,120	8,964	240	5,479	0	0	0	0	0	404	2,419	839	0	300	0	36,965	3,697	33,268
1050604	08802	2,790	2,292	0	7,170	240	1,800	0	0	0	0	0	123	1,054	440	0	75	0	15,984	1,598	14,386
1050604		2,330	3,260	680	13,121	440	5,637	0	0	5,010	0	0	514	13,540	311	0	450	0	45,293	0	45,293
1050522	089	9,271	20,060	0	10,231	1,280	17,410	0	1,520	1,320	0	0	750	13,039	1,584	0	450	0	76,915	7,692	69,223
1050602	089	3,877	3,165	0	3,536	440	360	0	0	0	0	0	341	3,508	575	0	225	0	16,027	1,603	14,424
1050604	183	2,437	3,540	0	4,562	240	715	0	0	0	0	0	72	1,273	399	0	150	0	13,388	1,339	12,049
1050605		2,330	4,140	1,350	3,209	480	1,855	0	0	0	0	0	251	1,617	355	0	75	0	15,662	0	15,662
1050607	320	2,804	1,719	0	3,131	240	240	0	0	0	0	0	221	1,413	352	0	150	0	10,270	0	10,270
1050529	207	6,373	6,876	4,290	6,589	1,640	7,559	0	0	0	20,500	0	2,863	17,962	1,144	0	375	0	76,171	0	76,171
1050605	278	3,375	2,592	0	1,911	240	293	0	0	0	0	0	217	7,432	399	0	180	0	16,639	1,664	14,975
1050603	089	3,888	6,200	0	8,146	680	990	0	0	0	0	0	231	2,622	619	0	150	0	23,526	2,353	21,173
1050603	169	3,714	3,438	0	2,307	6,795	930	0	0	0	0	0	154	4,923	663	0	105	0	23,029	2,303	20,726
1050603	321	4,608	7,380	0	4,026	240	2,174	0	0	0	0	0	257	5,458	707	0	225	0	25,075	2,508	22,567
1050608	29601	2,023	3,540	0	3,397	480	150	0	0	0	0	0	104	761	352	0	150	0	10,957	0	10,957
1050603	178	4,801	4,038	0	5,423	480	882	0	0	0	0	0	285	6,131	707	0	225	0	22,972	2,297	20,675
1050526	08003	7,202	18,000	5,460	7,316	640	16,157	0	0	0	0	0	546	21,585	1,455	0	255	0	78,616	0	78,616
1050601	320	5,300	5,730	0	6,001	240	1,134	0	0	0	0	0	305	2,106	968	0	225	0	22,009	2,201	19,808
1050521	31501	9,432	15,736	6,970	17,619	240	13,667	0	0	1,320	0	0	966	27,735	1,851	0	600	0	96,136	9,614	86,522
1050606	20401	2,274	2,592	0	3,280	480	300	0	0	0	0	0	80	489	487	0	150	0	10,132	1,013	9,119
1050606	321	2,852	5,900	0	4,480	6,700	570	0	1,120	0	0	0	163	1,355	440	2,406	150	0	26,136	2,614	23,522
1050517		12,743	31,860	4,240	15,614	7,802	28,063	0	0	0	0	0	3,578	21,160	2,376	0	855	0	128,291	0	128,291
1050606	090	3,535	4,986	0	4,127	640	390	0	0	0	0	0	217	4,654	487	0	180	0	19,216	0	19,216
1050603	29701	4,594	4,884	0	1,202	1,836	930	0	0	0	0	0	114	583	795	0	225	0	15,163	1,516	13,647
1050511	07903	13,485	18,336	0	8,720	1,840	25,780	0	0	0	0	0	744	22,833	2,951	0	480	0	95,169	10,331	84,838
1050606	278	4,081	3,738	0	5,316	440	613	0	0	0	0	0	349	5,687	663	0	255	0	21,142	2,114	19,028
1050607	20202	2,882	2,865	0	4,990	480	210	0	0	0	0	0	119	877	575	0	150	0	13,148	1,315	11,833
1050606	277	3,347	7,380	0	5,776	672	390	0	0	0	0	0	365	3,023	663	0	255	0	21,871	2,187	19,684
1050609	183	2,757	2,019	0	2,953	240	250	0	0	0	0	0	240	13,467	399	0	150	0	22,475	2,248	20,227
1050529	07902	6,698	14,058	5,850	7,858	640	12,943	0	0	0	0	0	675	19,534	1,455	0	450	0	70,161	0	70,161
1050516	07903	11,640	34,220	10,920	19,617	1,040	36,305	0	0	5,940	0	0	1,089	22,826	2,640	0	855	0	147,092	14,709	132,383
1050610	454	2,462	3,540	0	6,233	240	300	0	0	0	0	0	163	447	399	0	150	0	13,934	1,393	12,541
1050605	08002	4,053	9,740	0	2,913	1,980	1,534	0	560	0	0	0	276	5,240	751	0	255	0	27,302	0	27,302
1050607	320	3,888	3,438	0	3,978	600	2,824	0	0	0	0	0	300	2,290	663	0	225	0	18,206	0	18,206
1050611	39502	2,095	3,540	0	6,915	240	370	0	0	3,690	0	0	127	488	264	0	75	0	17,804	1,780	16,024
1050606	320	4,476	4,311	0	9,906	240	660	0	0	0	0	0	310	2,518	663	0	225	0	23,309	2,331	20,978
1050602	08003	6,468	12,980	0	11,932	640	2,850	0	0	0	0	0	213	11,276	1,103	0	330	0	47,792	4,779	43,013
1050611	XXX	1,921	3,540	0	2,913	6,962	330	0	0	0	0	0	87	274	311	0	75	0	16,413	1,641	14,772
1050603	07902	5,653	12,100	0	5,349	440	3,162	0	560	0	0	0	432	7,523	968	0	300	0	36,487	3,649	32,838
1050603	320	5,286	6,603	4,240	5,637	4,280	4,010	0	0	0	0	0	348	2,110	1,103	0	225	0	33,842	3,384	30,458
1050524	41601	10,284	25,080	8,090	16,979	840	15,120	0	0	0	0	0	2,224	3,873	1,983	0	300	0	84,773	8,477	76,296
1050609	090	3,672	2,865	0	4,480	240	500	0	0	0	0	0	161	7,286	531	0	225	0	19,960	1,996	17,964
1050610	41601	2,815	2,019	1,020	6,887	440	2,205	0	0	0	0	0	281	6,285	443	0	300	0	22,695	2,270	20,425
1050608	08002	4,536	8,260	0	5,758	440	1,780	0	0	0	0	0	162	8,900	704	0	225	0	30,765	3,077	27,688
1050605	20401	5,681	10,620	0	8,792	17,935	990	0	0	0	0	0	388	3,056	927	0	300	0	48,689	4,869	43,820
1050609	331	3,463	2,865	0	3,806	240	270	0	0	0	0	0	238	1,311	575	0	150	0	12,918	1,292	11,626
1050610	321	3,008	2,292	0	2,643	7,442	180	0	0	0	0	0	201	1,165	443	0	150	0	17,524	1,752	15,772
1050519	29401	10,704	32,160	10,530	11,923	5,640	21,044	0	0	0	0	0	1,373	6,483	2,511	0	600	0	102,968	0	102,968
1050606	292	6,048	10,920	1,120	18,949	14,090	11,630	7,708	0	0	0	6,075	2,655	16,967	883	0	330	0	97,375	9,738	87,637
1050605	182	5,300	11,800	0	4,998	480	780	0	0	0	0	0	396	3,930	1,015	0	300	0	28,999	2,900	26,099
1050610		3,143	3,438	0	2,605	240	2,190	0	0	0	0	0	288	959	531	0	150	0	13,544	0	13,544
1050529	311	9,051	21,540	0	10,956	1,925	6,908	12,281	0	0	0	2,550	770	12,662	1,719	0	525	0	80,887	8,089	72,798
1050613	183	2,095	3,840	0	6,884	240	270	0	0	0	0	0	273	2,798	399	0	150	0	16,949	1,695	15,254
1050609	07902	5,380	9,440	0	9,789	440	3,920	0	0	0	0	0	369	15,902	751	0	255	0	46,246	0	46,246
1050613	277	3,277	3,540	0	1,723	240	268	0	0	0	0	0	329	2,788	399	0	180	0	12,744	1,274	11,470
1050613	17504	2,815	4,720	0	7,110	240	3,747	0	0	0	0	0	255	4,124	440	0	150	0	23,601	2,360	21,241
1050530	07903	8,872	20,060	0	9,983	6,795	17,744	0	320	0	0	0	1,042	34,124	1,631	0	630	0	101,201	10,120	91,081
1050615	20401	1,823	2,360	0	2,808	480	90	0	0	0	0	0	50	367	223	0	75	0	8,276	828	7,448
1050614	321	2,288	3,840	0	2,151	240	484	0	0	0	0	0	262	904	399	0	150	0	10,718	1,072	9,646
1050614	321	2,288	2,019	0	180	240	0	0	0	0	0	0	226	340	311	0	150	0	5,754	575	5,179
1050530	089	10,832	40,629	0	24,065	2,400	14,388	0	0	0	0	0	780	40,046	1,760	1,031	930	0	136,861	0	136,861
1050614	278	2,655	3,540	0	3,228	840	350	0	0	0	0	0	266	3,623	355	0	180	0	15,037	1,504	13,533
1050613	321	3,714	3,438	0	2,633	240	390	0	0	0	0	0	238	2,584	575	0	255	0	14,067	0	14,067
1050609	17901	5,976	10,920	0	16,210	6,435	4,720	0	0	0	0	0	284	5,279	883	0	300	0	51,007	5,101	45,906
1050522	320	8,703	16,820	0	10,542	480	12,337	0	1,120	0	0	0	798	25,529	1,499	0	525	0	78,353	7,835	70,518
1050614	13903	3,714	3,438	0	14,303	920	1,760	0	0	0	0	0	90	1,341	616	0	210	0	26,392	2,639	23,753
1050602	089	7,379	19,480	0	6,408	240	10,465	0	0	1,320	0	0	732	12,011	1,543	2,062	675	0	62,315	0	62,315
1050613	089	4,255	3,738	1,950	4,577	480	3,030	0	0	0	16,400	0	387	2,223	663	0	255	0	37,958	0	37,958
1050617	278	2,910	3,540	0	1,803	672	266	0	0	0	0	0	288	3,829	308	0	180	0	13,796	1,380	12,416
1050617	141	3,182	4,720	0	11,305	240	600	0	0	0	0	0	183	855	399	0	150	0	21,634	2,163	19,471
1050531	025	8,133	12,033	0	7,899	10,900	7,170	0	0	0	0	0	116	7,333	1,936	0	225	0	55,745	0	55,745
1050617	090	2,641	4,720	0	1,567	240	330	0	0	0	0	0	110	2,076	440	0	150	0	12,274	1,227	11,047
1050614	41601	3,742	8,260	2,090	5,829	240	5,435	0	0	0	0	0	265	912	663	0	225	0	27,661	2,766	24,895
1050616	278	2,743	5,020	0	2,028	240	625	0	0	0	0	0	272	2,424	443	0	75	0	13,870	1,387	12,483
1050611	08003	5,126	11,800	0	6,119	440	2,520	0	0	0	0	0	252	7,097	927	1,031	255	0	35,567	3,557	32,010
1050614	089	3,686	9,440	2,730	4,426	200	2,434	0	0	0	0	0	359	4,205	792	0	225	0	28,497	0	28,497
1050609	47701	6,143	14,160	0	6,424	480	850	0	0	0	0	0	488	5,553	1,191	0	300	0	35,589	3,559	32,030
1050618	17404	2,641	2,292	0	6,468	14,482	578	0	0	0	0	0	324	1,129	440	0	150	0	28,504	2,850	25,654
1050617	24802	2,274	2,019	0	2,846	240	300	0	0	0	0	0	183	530	399	0	150	0	8,941	894	8,047
1050614	207	4,608	4,311	0	4,954	920	630	0	0	0	0	0	334	1,742	707	0	225	0	18,431	1,843	16,588
1050604	089	8,138	9,741	6,240	8,386	6,795	19,413	0	0	0	0	0	706	11,919	1,587	0	405	0	73,330	7,333	65,997
1050618	20401	2,437	3,840	0	2,664	7,202	120	0	0	0	0	0	85	573	355	0	150	0	17,426	1,743	15,683
1050616	20401	3,449	3,438	0	5,632	240	420	0	0	0	0	0	247	645	616	0	150	0	14,837	1,484	13,353
1050621	YYY	2,817	573	0	3,595	240	3,765	0	0	0	0	0	235	1,093	179	0	225	0	12,722	0	12,722
1050621	278	2,176	3,540	0	3,234	240	210	0	0	0	0	0	231	1,848	311	0	180	0	11,970	1,197	10,773
1050617	180	3,888	7,080	0	5,272	7,602	705	0	0	0	0	0	276	5,523	663	1,031	225	0	32,265	3,227	29,038
1050618	321	3,521	7,080	0	6,934	240	390	0	0	0	0	0	305	2,013	616	0	225	0	21,324	0	21,324
1050617	090	3,874	8,260	0	2,293	0	1,500	0	0	0	0	0	347	3,220	704	0	150	0	20,348	2,035	18,313
1050613	20401	4,745	6,303	0	5,396	6,995	2,300	0	0	0	0	0	328	10,730	1,056	0	300	0	38,153	3,815	34,338
1050617	321	4,081	7,080	0	4,152	5,240	388	0	0	0	0	0	281	1,903	619	0	225	0	23,969	0	23,969
1050617	206	3,700	4,011	0	7,340	7,442	570	0	0	0	0	0	87	581	663	0	150	0	24,544	2,454	22,090
1050613	331	4,759	6,030	0	6,376	240	870	0	0	0	0	0	368	2,813	1,015	1,031	450	0	23,952	2,395	21,557
1050621	321	2,288	3,540	0	1,818	240	180	0	0	0	0	0	155	542	352	0	150	0	9,265	927	8,338
1050608	08801	7,555	19,180	0	19,094	12,380	13,104	0	1,440	3,960	0	0	1,007	28,384	1,543	0	405	0	108,052	0	108,052
1050619	278	4,448	3,438	0	3,409	672	898	0	0	0	0	0	265	4,046	575	0	255	0	18,006	1,801	16,205
1050618	320	3,874	8,260	0	4,576	4,040	570	0	1,840	0	0	0	306	3,121	704	2,062	225	0	29,578	2,958	26,620
1050609	089	7,221	10,620	0	6,586	1,360	6,652	0	0	0	0	0	420	11,414	971	0	330	0	45,574	4,557	41,017
1050617	41602	4,406	5,157	0	11,475	480	1,110	0	0	0	0	0	288	2,578	839	0	300	0	26,633	2,663	23,970
1050617	089	6,283	10,620	3,120	7,654	640	11,040	0	0	0	0	0	497	23,921	839	1,031	330	0	65,975	6,598	59,377
1050619	320	3,347	3,438	0	3,263	7,442	540	0	0	0	0	0	233	8,367	619	0	150	0	27,399	2,740	24,659
1050624	20201	1,921	3,540	0	3,520	240	450	0	0	0	0	0	147	1,237	352	0	150	0	11,557	0	11,557
1050619	369	3,700	4,311	0	2,882	7,442	360	0	0	0	0	0	377	8,855	751	0	225	0	28,903	2,890	26,013
1050619	20201	4,689	4,011	0	11,726	240	810	0	0	0	0	0	500	2,089	707	1,031	225	0	26,028	2,603	23,425
1050624	182	2,288	1,719	0	2,551	240	508	0	0	0	0	0	232	2,224	311	0	150	0	10,223	1,022	9,201
1050618	320	3,860	9,440	0	5,871	240	1,770	0	0	0	0	0	492	5,599	795	0	225	0	28,292	2,829	25,463
1050624	18905	3,022	3,540	0	1,555	7,442	270	0	0	0	0	0	280	1,580	311	0	180	0	18,180	1,818	16,362
1050617	321	4,759	11,800	0	2,895	240	1,020	0	0	0	0	0	332	2,714	968	0	300	0	25,028	2,503	22,525
1050621	178	3,714	7,080	0	12,061	3,800	1,560	0	0	0	0	0	123	761	616	0	150	0	29,865	2,987	26,878
1050622	18805	2,118	5,900	0	8,372	6,155	660	0	0	0	0	0	117	393	440	0	150	0	24,305	2,431	21,874
1050623	183	3,319	4,720	0	4,990	240	270	0	0	0	0	0	183	1,337	487	0	150	0	15,696	0	15,696
1050608	07902	8,162	22,720	7,020	7,901	640	15,208	0	0	0	0	0	753	17,123	1,807	0	555	0	81,889	0	81,889
1050617	278	5,479	6,303	0	2,468	240	5,289	0	0	0	0	0	443	7,557	1,015	0	330	0	29,124	2,912	26,212
1050622	321	3,816	3,438	0	14,295	480	2,100	0	0	0	0	0	297	12,129	575	0	225	0	37,355	3,736	33,619
1050610	08002	7,639	20,360	5,850	5,818	840	21,819	0	0	0	0	0	730	14,031	1,499	0	405	0	78,991	0	78,991
1050626	090	1,935	2,660	0	2,761	240	180	0	0	0	0	0	140	2,352	267	0	75	0	10,610	1,061	9,549
1050613	07903	7,300	18,000	5,460	10,054	640	13,915	0	0	2,640	32,800	0	472	16,981	1,411	0	405	0	110,078	0	110,078
1050616	07903	7,230	7,449	4,080	7,511	640	14,319	0	0	1,320	0	0	631	4,000	1,191	0	405	0	48,776	4,878	43,898
1050623	320	3,305	4,440	1,170	5,467	240	7,485	0	0	795	0	0	371	16,765	487	0	225	0	40,750	4,075	36,675
1050628	YYY	1,117	1,180	0	3,727	4,800	1,283	0	0	0	0	0	207	1,369	88	0	75	0	13,846	0	13,846
1050623	20401	3,463	6,200	0	8,467	680	540	0	0	0	12,300	0	143	411	531	0	225	0	32,960	0	32,960
1050527	01405	2,815	2,592	0	4,960	4,800	492	0	0	0	0	0	119	968	399	0	300	0	17,445	0	17,445
1050516	01405	10,379	52,992	6,240	27,240	13,300	20,201	0	5,960	0	0	0	2,380	14,655	1,455	0	1,080	0	155,882	0	155,882
1050523	24301	4,213	5,457	0	13,194	25,540	1,075	0	0	0	0	0	385	5,121	927	0	225	0	56,137	5,614	50,523
1050531	02001	1,412	3,540	0	0	0	60	0	0	0	0	0	64	3,076	352	0	150	0	8,654	0	8,654
1050528	01405	3,403	6,200	1,900	5,543	12,600	2,301	0	560	0	0	0	377	587	572	0	225	0	34,268	0	34,268
1050530	01406	2,288	2,019	0	7,443	12,600	60	0	0	0	0	0	76	330	399	2,062	150	0	27,427	0	27,427
1050522	01406	7,485	40,260	2,920	13,406	12,060	4,456	0	0	0	0	0	479	3,460	1,056	0	1,200	0	86,782	0	86,782
1050516	01405	8,138	20,360	0	6,843	12,600	1,410	0	5,440	0	0	0	209	1,914	1,631	0	450	0	58,995	0	58,995
1050505	01405	13,602	48,700	9,880	15,745	10,940	13,402	0	10,080	1,320	0	0	1,264	10,418	2,599	0	810	0	138,760	0	138,760
1050526	01405	4,903	8,560	0	14,251	11,300	210	0	2,280	0	0	0	144	1,692	751	0	150	0	44,241	0	44,241
1050527	01406	3,347	7,080	0	6,028	12,600	60	0	2,000	0	0	0	108	1,361	663	0	225	0	33,472	0	33,472
1050531	01505	2,095	3,540	0	7,239	11,300	270	0	0	0	0	0	76	161	311	0	150	0	25,142	0	25,142
1050531	01405	2,641	4,720	0	4,949	11,300	274	0	2,000	0	0	0	248	1,354	440	0	150	0	28,076	0	28,076
1050528	01406	3,714	3,465	0	11,738	12,600	910	0	2,040	0	0	0	87	533	575	0	150	0	35,812	0	35,812
1050601	01406	2,390	3,540	0	4,449	11,300	0	0	0	0	0	0	72	328	311	0	150	0	22,540	0	22,540
1050601	XXX	2,023	3,540	0	6,499	11,300	0	0	0	0	0	0	76	458	311	1,031	150	0	25,388	2,539	22,849
1050524	01406	5,493	12,100	0	4,978	12,840	270	0	1,840	0	0	0	201	2,069	1,015	0	150	0	40,956	0	40,956
1050528	XXX	4,123	3,192	0	8,917	11,300	772	0	0	0	0	0	294	5,803	575	0	225	0	35,201	3,520	31,681
1050520	01401	6,947	16,820	4,770	7,794	5,000	17,426	0	0	0	0	0	656	10,759	1,276	0	375	0	71,823	0	71,823
1050602	01506	1,670	2,360	0	5,250	11,300	0	0	0	0	0	0	87	492	223	0	75	0	21,457	0	21,457
1050601	13402	3,110	4,720	0	5,366	11,060	0	0	0	0	0	0	80	1,110	440	0	150	0	26,036	2,604	23,432
1050528	01406	3,333	4,038	0	9,385	13,942	310	0	0	0	0	0	87	1,791	707	0	150	0	33,743	0	33,743
1050604	142	1,389	573	0	8,779	11,300	430	0	0	0	0	0	48	224	135	0	75	0	22,953	2,295	20,658
1050528	XXX	4,241	4,311	0	13,392	16,300	1,090	0	0	0	0	0	397	7,549	751	1,031	225	0	49,287	4,929	44,358
1050415	01405	7,453	17,036	6,240	11,000	400	21,022	0	2,240	0	32,800	0	1,722	15,284	1,408	0	375	0	116,980	0	116,980
1050604	01406	1,935	2,360	0	4,107	11,300	390	0	0	0	0	0	58	393	223	0	75	0	20,841	0	20,841
1050528	01405	4,631	10,620	2,290	5,410	0	2,483	0	3,840	0	0	0	104	1,185	880	0	75	0	31,518	0	31,518
1050603	090	1,935	2,660	0	6,488	6,740	720	0	0	0	0	0	144	2,732	311	0	180	0	21,910	0	21,910
1050602	01406	2,743	2,292	0	5,797	11,300	210	0	1,400	0	0	0	68	744	440	0	150	0	25,144	0	25,144
1050603	01406	2,843	1,446	0	4,693	8,240	268	0	840	0	0	0	65	629	311	0	150	0	19,485	0	19,485
1050602	01401	2,529	2,292	0	708	16,300	100	0	0	0	0	0	83	375	487	0	150	0	23,024	0	23,024
1050602	01405	3,305	5,900	0	4,849	11,300	0	0	0	0	0	0	148	1,318	528	0	150	0	27,498	0	27,498
1050530	01405	3,700	8,260	0	5,425	11,300	450	0	4,760	0	0	0	106	1,392	751	0	150	0	36,294	0	36,294
1050602	01201	3,263	3,840	0	4,943	13,140	345	0	2,000	0	0	0	76	1,907	396	0	150	0	30,060	3,006	27,054
1050604	01406	2,476	2,660	0	5,610	16,300	250	0	1,440	0	0	0	73	571	311	0	75	0	29,766	0	29,766
1050522	01406	6,933	18,000	5,650	7,975	11,300	18,385	0	0	0	0	0	558	5,181	1,408	0	255	0	75,645	0	75,645
1050604	01406	2,109	1,446	0	4,410	12,600	1,200	0	0	0	0	0	62	715	311	0	75	0	22,928	0	22,928
1050601	01405	3,602	7,080	0	8,855	12,600	120	0	0	0	0	0	133	1,796	575	2,062	150	0	36,973	0	36,973
1050527	018	5,704	12,980	0	8,593	11,900	261	2,081	2,640	4,620	7,425	0	34,782	3,693	968	0	225	0	95,872	9,587	86,285
1050607	24302	1,470	573	0	5,874	11,750	0	0	0	0	0	0	47	712	176	0	75	0	20,677	2,068	18,609
1050607	01201	706	1,180	0	2,100	11,700	0	0	0	0	0	0	29	51	88	0	75	0	15,929	1,593	14,336
1050603	035	2,790	2,292	0	12,184	16,300	2,130	0	0	0	0	0	153	4,363	487	0	150	0	40,849	0	40,849
1050607	01406	2,109	2,360	0	4,575	6,740	30	0	0	0	0	0	105	274	223	0	75	0	16,491	0	16,491
1050607		2,190	3,540	0	10,203	11,260	469	0	0	0	0	0	130	1,254	264	0	75	0	29,385	0	29,385
1050606	44901	3,415	13,373	0	6,404	640	10,980	0	0	0	0	0	69	332	311	1,031	75	0	36,630	3,663	32,967
1050605	01201	2,641	5,020	0	5,135	12,600	238	0	1,400	0	0	0	113	1,551	487	0	150	0	29,335	2,934	26,401
1050603	01406	4,608	8,260	0	6,088	12,960	0	0	3,440	0	0	0	175	800	663	0	225	0	37,219	0	37,219
1050606	01406	2,655	3,840	0	4,968	8,040	150	0	840	0	0	0	88	608	311	0	150	0	21,650	0	21,650
1050530	01405	6,373	14,160	0	10,413	10,540	420	0	7,200	0	0	0	411	4,549	1,144	0	375	0	55,585	0	55,585
1050602	01405	4,875	10,620	0	10,645	11,840	315	0	2,560	0	0	0	297	2,594	839	0	300	0	44,885	0	44,885
1050609	01406	1,879	2,360	0	4,109	11,300	0	0	0	0	0	0	47	1,171	264	0	75	0	21,205	0	21,205
1050608	035	1,568	1,446	0	12,770	11,300	30	0	0	0	0	0	61	279	311	0	150	0	27,915	2,792	25,123
1050608	01505	1,412	1,719	0	3,845	6,700	120	0	0	0	0	0	43	1,150	352	0	150	0	15,491	0	15,491
1050609	019	1,317	1,180	0	4,035	8,040	60	0	0	0	0	0	52	389	223	0	75	0	15,371	1,537	13,834
1050605	321	4,095	3,165	0	3,436	240	410	0	1,320	0	0	0	273	1,352	575	0	225	0	15,091	0	15,091
1050603	01202	5,056	8,260	0	7,077	16,300	180	0	2,040	0	0	0	119	1,042	751	1,031	150	0	42,006	4,201	37,805
1050610	01405	2,302	2,360	0	7,550	11,300	30	0	0	0	0	0	47	319	264	0	75	0	24,247	0	24,247
1050611	065	1,742	2,360	0	4,010	5,250	60	0	0	0	0	0	66	274	264	0	75	0	14,101	1,410	12,691
1050610	01506	1,742	2,360	0	4,800	11,300	0	0	0	0	0	0	63	1,206	311	0	150	0	21,932	2,193	19,739
1050609	01401	4,258	4,720	0	9,882	23,737	120	0	840	0	0	0	526	393	440	0	150	0	45,066	0	45,066
1050604	01405	5,314	5,157	0	14,602	11,500	4,429	0	3,520	0	0	0	288	3,607	927	0	180	0	49,524	0	49,524
1050611	01202	2,146	3,540	0	5,465	6,700	0	0	0	0	0	0	25	819	352	2,062	0	0	21,109	2,111	18,998
1050610	01405	3,549	5,020	0	6,325	12,600	30	0	2,600	0	0	0	138	1,954	443	0	150	0	32,809	0	32,809
1050614	01406	1,389	1,180	0	5,664	8,040	30	0	0	0	0	0	79	245	135	0	75	0	16,837	0	16,837
1050602	01405	6,510	14,460	3,940	7,735	11,932	1,691	0	5,400	0	0	0	165	4,118	1,147	0	150	0	57,248	0	57,248
1050613	01406	3,876	4,720	0	15,921	11,300	0	0	0	0	0	0	136	933	440	0	75	0	37,401	0	37,401
1050611	01406	2,838	5,866	0	4,706	17,950	1,270	0	0	0	0	0	3,821	579	528	1,031	150	0	38,739	3,874	34,865
1050610	019	4,434	8,260	0	6,038	8,040	270	0	1,440	0	0	0	92	923	663	0	150	0	30,310	3,031	27,279
1050617	025	1,624	1,180	0	2,902	240	30	0	0	0	0	0	140	64	176	0	75	0	6,431	643	5,788
1050613	065	3,549	5,020	0	12,851	11,300	90	0	0	0	0	0	178	349	487	0	150	0	33,974	3,397	30,577
1050614	019	2,462	2,019	0	5,048	14,082	150	0	0	0	0	0	629	222	355	0	75	0	25,042	2,504	22,538
1050614	01506	1,921	1,719	0	5,995	11,300	90	0	0	0	0	0	76	1,528	399	0	150	0	23,178	0	23,178
1050608	01601	5,535	5,730	0	9,696	20,202	1,603	0	0	0	20,500	0	47	534	968	0	75	0	64,890	0	64,890
1050616	04502	1,059	2,360	0	3,109	11,700	0	0	0	0	0	0	15	125	88	0	0	0	18,456	1,846	16,610
1050615	24802	2,462	3,540	0	5,230	11,840	30	0	0	0	0	0	61	373	311	0	150	0	23,997	2,400	21,597
1050606	01406	5,832	6,876	0	6,653	11,840	630	0	3,480	0	0	0	130	1,063	1,103	0	225	0	37,832	0	37,832
1050607	01405	8,160	45,480	1,950	15,726	9,040	3,831	0	1,600	0	0	0	356	2,657	1,144	0	375	0	90,319	0	90,319
1050613	39706	3,535	6,200	0	4,218	8,025	330	0	0	1,320	0	0	161	574	575	0	75	0	25,013	2,501	22,512
1050602	01405	8,289	19,180	0	23,659	18,305	5,671	0	2,040	0	0	0	648	22,472	1,499	0	630	0	102,393	0	102,393
1050617	01702	1,215	573	0	5,375	12,600	0	0	0	0	0	0	47	58	179	0	75	0	20,122	2,012	18,110
1050617	01506	1,389	573	0	4,973	11,300	0	0	0	0	0	0	48	316	179	0	75	0	18,853	1,885	16,968
1050615	01506	2,743	4,720	0	8,663	11,660	60	0	0	0	0	0	77	352	311	0	150	0	28,736	2,874	25,862
1050612	01303	3,449	3,465	0	6,680	11,740	100	0	0	0	0	0	208	10,422	575	0	975	0	37,614	3,761	33,853
1050615	01405	2,743	4,720	0	4,997	11,300	346	0	840	0	0	0	121	576	440	0	150	0	26,233	0	26,233
1050616	01406	2,190	1,146	0	4,200	11,300	120	0	0	0	0	0	61	425	311	0	150	0	19,903	0	19,903
1050615	01406	3,672	5,900	0	6,022	11,300	315	0	840	0	0	0	76	945	399	0	150	0	29,619	0	29,619
1050617	025	1,742	2,660	0	3,500	690	30	0	0	0	0	0	202	1,178	311	0	225	0	10,538	1,054	9,484
1050617	01405	2,829	3,540	0	11,855	12,600	2,570	0	1,440	0	0	0	83	443	311	0	75	0	35,746	0	35,746
1050617	01505	1,935	2,660	0	8,983	11,840	70	0	0	0	0	0	139	235	311	0	75	0	26,248	2,625	23,623
1050527	01405	15,232	59,940	8,660	20,072	17,100	34,695	0	3,760	0	0	0	1,264	22,646	2,247	0	1,200	0	186,816	0	186,816
1050619	035	1,568	1,146	0	4,921	8,280	90	0	0	0	0	0	47	187	223	0	75	0	16,537	1,654	14,883
1050617	01405	2,288	1,719	0	5,019	8,040	60	0	560	0	0	0	76	955	355	0	150	0	19,222	0	19,222
1050617	019	2,641	2,292	0	9,388	6,740	150	0	2,240	0	0	0	260	1,112	399	0	150	0	25,372	2,537	22,835
1050603	02002	7,808	21,240	0	15,002	6,355	831	2,081	4,440	0	14,850	0	67,677	763	1,584	0	150	0	142,781	14,278	128,503
1050611	181	4,250	11,800	0	4,717	400	936	0	0	0	0	0	269	1,818	968	1,031	300	0	26,489	2,649	23,840
1050619	025	1,742	2,360	0	2,352	4,800	930	0	0	0	0	0	120	496	223	0	75	0	13,098	1,310	11,788
1050618	01203	1,935	1,446	0	9,728	11,660	90	0	0	0	0	0	152	414	267	0	75	0	25,767	2,577	23,190
1050617	01406	2,448	4,720	0	4,514	11,300	120	0	0	0	0	0	116	897	440	0	150	0	24,705	0	24,705
1050617	01405	3,182	4,720	0	5,519	11,300	120	0	0	0	0	0	87	694	487	0	150	0	26,259	0	26,259
1050620	01506	1,568	2,360	0	6,944	11,300	30	0	0	0	0	0	47	514	264	0	75	0	23,102	0	23,102
1050615	01405	3,333	8,260	0	6,224	11,300	0	0	0	0	0	0	151	998	663	0	225	0	31,154	0	31,154
1050528	018	11,879	38,544	0	26,433	23,860	3,676	2,081	1,520	0	12,375	0	56,969	3,702	2,159	1,031	825	0	185,054	18,505	166,549
1050616	065	3,082	7,080	0	2,732	4,800	60	0	0	0	0	0	195	687	616	0	225	0	19,477	1,948	17,529
1050609	01405	5,558	9,440	780	7,373	16,340	1,841	0	2,320	0	0	0	197	3,740	886	0	225	0	48,700	0	48,700
1050610	01303	5,479	13,280	0	1,977	14,240	1,205	2,081	2,640	0	12,375	0	56,958	6,288	1,103	0	300	0	117,926	11,793	106,133
1050617	01405	2,896	3,840	0	17,536	24,642	0	0	0	0	0	0	494	291	396	0	150	0	50,245	0	50,245
1050617	01202	3,510	5,900	0	7,737	11,540	342	0	0	0	0	0	210	737	528	0	150	0	30,654	3,065	27,589
1050619	025	2,801	5,900	0	4,824	4,800	120	0	0	0	0	0	105	931	528	0	75	0	20,084	0	20,084
1050613	01405	5,995	12,980	0	13,678	11,300	30	0	4,800	0	0	0	139	1,566	1,056	0	525	0	52,069	0	52,069
1050613	01405	6,269	6,030	2,730	12,340	8,040	1,407	0	6,240	0	0	0	80	913	1,015	0	150	0	45,214	0	45,214
1050618	01505	3,168	6,200	0	5,234	11,300	990	0	1,120	0	0	0	0	1,531	528	0	0	0	30,071	0	30,071
1050621	019	1,921	1,719	0	5,537	11,300	150	0	0	0	0	0	47	193	311	0	75	0	21,253	2,125	19,128
1050622	01601	1,670	2,360	0	2,882	4,800	94	0	0	0	0	0	64	1,030	135	0	75	0	13,110	1,311	11,799
1050619	04501	2,274	2,019	0	4,427	16,300	120	0	0	0	0	0	109	455	352	0	150	0	26,206	2,621	23,585
1050617	01405	4,081	3,738	0	10,775	11,300	270	0	2,040	0	0	0	279	5,298	663	0	255	0	38,699	0	38,699
1050617	01406	3,521	7,380	0	8,508	11,300	150	0	0	0	0	0	124	1,334	663	0	225	0	33,205	0	33,205
1050621	01203	1,412	3,540	0	780	6,900	120	0	0	0	0	0	0	225	264	0	0	0	13,241	0	13,241
1050624	065	1,215	1,180	0	5,738	12,600	0	0	0	0	0	0	48	148	135	0	75	0	21,139	2,114	19,025
1050622	019	2,232	3,540	0	4,669	11,300	90	0	0	0	0	0	61	613	352	0	150	0	23,007	2,301	20,706
1050622	019	2,023	3,540	0	3,824	11,840	0	0	0	0	0	0	61	307	352	0	150	0	22,097	2,210	19,887
1050618	01405	3,521	3,438	0	11,103	11,300	828	0	2,080	0	0	0	104	1,154	619	0	225	0	34,372	0	34,372
1050617	01405	4,241	4,311	0	7,141	16,400	180	0	840	0	0	0	108	1,687	751	0	225	0	35,884	0	35,884
1050611	320	7,272	16,520	0	14,058	11,500	4,266	0	0	1,320	24,600	0	1,176	7,978	1,320	0	300	0	90,310	0	90,310
1050620	01406	2,641	5,020	0	4,460	11,300	0	0	2,040	0	0	0	61	569	487	0	150	0	26,728	0	26,728
1050605	01405	9,813	22,720	7,410	21,685	11,500	20,884	0	6,840	0	0	0	719	17,005	1,807	0	450	0	120,833	0	120,833
1050622	01506	2,376	4,720	0	4,249	11,300	0	0	0	0	0	0	61	661	440	0	150	0	23,957	0	23,957
1050623	01405	2,404	1,446	0	8,318	11,300	30	0	840	0	0	0	65	676	311	0	75	0	25,465	0	25,465
1050620	01406	2,994	6,200	0	5,675	11,300	0	0	2,600	0	0	0	76	915	575	0	150	0	30,485	0	30,485
1050619	01406	3,863	7,080	0	6,480	12,600	150	0	1,440	0	0	0	80	1,820	663	0	150	0	34,326	0	34,326
1050620	01405	3,535	6,200	0	9,025	18,800	460	0	1,200	0	0	0	76	813	531	0	450	0	41,090	0	41,090
1050623	035	1,670	1,480	0	4,110	13,032	60	0	0	0	0	0	126	620	267	0	75	0	21,440	2,144	19,296
1050604	01405	9,878	12,606	7,750	15,605	19,140	9,244	0	11,760	0	0	0	939	11,433	2,024	0	660	0	101,039	0	101,039
1050625	01405	1,568	2,360	0	5,126	6,740	180	0	0	0	0	0	73	177	264	0	0	0	16,488	0	16,488
1050625	01601	2,476	2,360	0	4,960	8,040	30	0	0	0	0	0	51	452	264	0	75	0	18,708	1,871	16,837
1050625	01506	2,109	2,360	0	3,839	11,300	180	0	0	0	0	0	47	862	264	0	225	0	21,186	0	21,186
1050619	01405	4,067	4,618	0	6,783	12,600	270	0	2,640	0	0	0	142	826	751	0	225	0	32,922	0	32,922
1050625	142	1,059	2,360	0	9,315	6,700	0	0	0	0	0	0	0	28	176	0	0	0	19,638	1,964	17,674
1050620	01405	4,959	18,700	0	15,857	11,300	3,444	0	1,440	9,440	0	0	862	4,810	704	0	600	0	72,116	0	72,116
1050622	018	3,361	5,900	0	13,760	11,300	3,360	0	0	0	0	0	217	8,212	487	0	150	0	46,747	4,675	42,072
1050622	01406	3,361	5,900	0	5,020	11,060	0	0	0	0	0	0	83	523	399	0	150	0	26,496	2,650	23,846
1050624	065	1,568	2,660	0	4,839	8,040	120	0	0	0	0	0	59	518	311	0	75	0	18,190	1,819	16,371
1050624	01406	2,344	1,146	0	5,283	6,740	180	0	840	0	0	0	73	429	311	0	75	0	17,421	0	17,421
1050625	01502	1,059	2,360	0	5,905	11,700	0	0	0	1,320	0	0	47	914	264	0	75	0	23,644	2,364	21,280
1050618	29401	3,897	5,157	0	14,286	6,700	669	0	0	0	16,400	0	1,163	931	1,070	0	75	0	50,348	0	50,348
1050618	01601	4,759	11,800	3,510	7,861	4,800	8,166	0	320	0	0	0	297	1,401	927	0	600	0	44,441	4,444	39,997
1050624	01405	3,549	4,720	0	11,104	11,300	1,590	0	1,440	0	0	0	197	453	440	0	150	0	34,943	0	34,943
1050627	01304	1,073	1,180	0	350	0	160	0	0	0	0	0	0	19,790	176	0	0	0	22,729	0	22,729
1050623	01405	3,096	5,900	0	6,187	11,300	334	0	1,440	0	0	0	110	1,555	487	0	150	0	30,559	0	30,559
1050624	01406	2,462	3,840	0	5,391	12,600	0	0	0	0	0	0	61	403	355	0	150	0	25,262	0	25,262
1050611	01405	9,925	51,380	0	11,522	13,200	4,200	0	1,840	0	0	0	223	5,313	1,584	0	675	0	99,862	0	99,862
1050623	01406	3,305	3,165	0	4,128	6,740	330	0	1,440	0	0	0	76	1,007	531	0	150	0	20,872	0	20,872
1050627	065	1,935	1,146	0	6,582	11,300	130	0	0	0	0	0	47	536	264	0	75	0	22,015	2,202	19,813
1050626	24301	2,513	3,540	0	7,898	7,350	934	0	0	0	4,100	0	0	2,483	352	0	0	0	29,170	0	29,170
1050625	01505	2,462	3,840	0	5,919	11,300	240	0	0	0	0	0	88	518	399	0	150	0	24,916	0	24,916
1050622	01405	3,874	8,260	0	6,586	11,300	510	0	1,720	0	0	0	68	2,076	663	0	150	0	35,207	0	35,207
1050624	24802	3,728	2,865	0	12,191	6,950	645	0	840	0	0	0	145	1,220	487	0	150	0	29,221	2,922	26,299
1050625	01201	3,549	4,720	0	6,063	4,800	240	0	2,040	0	0	0	159	2,748	443	0	150	0	24,912	2,491	22,421
1050627	065	2,095	3,540	0	10,968	6,740	0	0	0	0	0	0	62	454	311	0	150	0	24,320	2,432	21,888
1050519	207	7,388	15,340	0	9,972	12,792	26,106	0	320	0	0	0	2,429	19,301	1,232	0	405	0	95,285	9,529	85,756
1050523	41601	5,655	9,440	0	6,219	480	4,264	0	0	3,340	0	0	2,963	6,564	748	0	375	0	40,048	4,005	36,043
1050527	41601	2,815	2,380	0	6,438	480	2,200	0	0	1,320	0	0	2,719	7,635	355	0	300	0	26,642	0	26,642
1050522	320	5,314	10,620	0	9,838	1,580	0	0	0	3,880	0	0	417	11,665	839	0	225	0	44,378	4,438	39,940
1050517	YYY	7,272	16,820	390	18,828	640	8,132	0	0	4,850	0	0	825	7,222	1,367	0	300	0	66,646	0	66,646
1050523	20201	6,389	35,840	0	9,926	440	7,778	0	0	0	0	0	2,824	29,724	839	0	750	0	94,510	0	94,510
1050527	205	3,182	4,140	390	5,019	5,280	765	2,818	0	0	12,300	0	48	682	399	0	0	0	35,023	0	35,023
1050512	20201	8,967	23,600	0	5,735	1,272	11,994	0	0	8,730	0	0	2,736	3,481	1,807	0	600	0	68,922	6,892	62,030
1050529	17404	2,451	2,660	0	7,502	7,682	1,135	0	0	0	0	0	138	3,082	267	0	75	0	24,992	2,499	22,493
1050523	182	5,563	9,740	5,210	5,279	640	2,401	0	960	0	0	0	392	5,367	839	0	225	0	36,616	0	36,616
1050505	41601	17,206	99,720	11,440	32,522	1,480	13,742	0	0	1,320	0	0	6,900	36,838	2,464	0	1,800	0	225,432	22,543	202,889
1050525	20201	4,025	7,380	0	7,056	440	1,500	0	0	0	0	0	249	3,233	663	0	255	0	24,801	2,480	22,321
1050516	206	7,799	17,120	0	9,966	7,202	540	0	0	0	0	0	390	3,364	1,279	0	375	0	48,035	4,804	43,231
1050524	20202	3,177	4,584	0	3,326	200	30	0	0	0	0	0	111	1,002	792	0	225	0	13,447	1,345	12,102
1050524		4,420	10,920	0	17,250	680	3,390	0	0	0	0	0	406	2,698	839	0	330	0	40,933	0	40,933
1050526	205	3,291	5,620	390	4,804	240	5,587	0	0	3,165	0	0	385	16,145	575	0	225	0	40,427	0	40,427
1050529	17404	2,462	1,746	780	4,914	240	1,512	0	0	0	0	0	129	1,689	355	0	150	0	13,977	1,398	12,579
1050521	20401	5,286	12,400	0	8,016	18,702	690	0	0	0	0	0	420	6,125	1,059	0	300	0	52,998	5,300	47,698
1050528	YYY	3,182	4,720	0	5,286	6,195	3,253	0	0	4,310	0	0	824	9,812	487	0	300	0	38,369	0	38,369
1050529	YYY	1,765	4,720	0	3,878	200	30	0	0	0	0	0	131	3,095	440	0	150	0	14,409	0	14,409
1050513	207	9,906	22,720	0	15,206	13,002	10,600	0	0	0	0	0	10,339	20,661	1,851	0	600	0	104,885	10,489	94,396
1050531	20401	2,437	3,540	0	3,453	240	180	0	0	0	0	0	68	625	352	0	150	0	11,045	1,105	9,940
1050531	17403	3,523	3,540	0	6,056	240	225	0	0	6,130	12,300	0	155	514	311	0	75	0	33,069	0	33,069
1050527	20201	3,521	7,380	0	5,594	0	1,334	0	0	0	0	0	274	3,195	663	0	225	0	22,186	0	22,186
1050601	20201	1,742	2,360	0	3,819	240	180	0	0	0	0	0	73	70	176	0	0	0	8,660	0	8,660
1050528	207	3,521	7,080	0	3,889	0	22,913	0	0	0	0	0	280	2,051	616	0	225	0	40,575	4,058	36,517
1050528	17404	2,627	5,020	0	1,334	240	435	0	0	970	0	0	349	1,404	531	0	225	0	13,135	1,314	11,821
1050517	17202	7,964	20,360	0	8,502	8,327	4,820	0	0	0	32,800	0	587	5,635	1,631	0	375	0	91,001	0	91,001
1050319		6,001	20,060	0	15,383	6,555	10,549	0	0	4,755	0	0	5,416	62,208	6,101	0	4,050	0	141,078	0	141,078
1050508	47501	14,400	78,840	8,580	15,672	440	31,547	0	0	1,320	0	0	2,363	21,507	2,464	0	1,755	0	178,888	17,889	160,999
1050601	20201	2,232	3,540	0	3,784	240	255	0	0	1,320	0	0	206	17,201	352	0	150	0	29,280	0	29,280
1050529	YYY	2,838	3,438	0	4,710	15,555	1,505	0	0	0	0	0	4,492	852	528	0	75	0	33,993	0	33,993
1050526	46801	4,731	9,740	0	5,926	8,122	10,181	18,360	0	1,590	0	6,075	10,596	13,621	839	0	300	0	90,081	0	90,081
1050525	18805	4,717	5,852	0	8,970	240	2,195	0	0	2,990	0	0	2,956	23,981	795	0	300	0	52,996	0	52,996
1050529	YYY	2,838	7,080	0	3,535	20,450	2,474	0	0	0	0	0	18,946	3,095	528	0	75	0	59,021	0	59,021
1050530	20201	2,815	5,020	0	1,696	240	4,871	0	0	2,290	0	0	352	23,707	399	0	150	0	41,540	0	41,540
1050530	178	2,994	2,892	0	3,500	240	0	0	0	0	0	0	326	2,924	443	0	150	0	13,469	1,347	12,122
1050529	182	3,888	5,620	0	3,171	440	0	0	0	0	0	0	360	7,514	487	0	150	0	21,630	2,163	19,467
1050601	20201	2,952	4,720	0	924	240	240	0	0	0	0	0	228	20,554	440	0	150	0	30,448	0	30,448
1050522	YYY	6,763	16,520	0	9,394	600	5,940	0	0	1,320	0	0	2,471	54,451	1,232	0	375	0	99,066	0	99,066
1050529	YYY	2,824	8,260	0	3,492	11,500	1,290	0	0	0	0	0	156	502	616	0	2,275	0	30,915	3,092	27,823
1050601	17404	2,232	1,719	0	5,814	240	550	0	0	5,010	0	0	321	3,274	399	0	150	0	19,709	1,971	17,738
1050525	206	4,919	12,980	0	2,688	240	0	0	0	0	0	0	162	993	1,056	0	300	0	23,338	2,334	21,004
1050601	183	3,110	4,720	0	3,909	480	0	0	0	0	0	0	207	2,870	440	0	150	0	15,886	1,589	14,297
1050526	207	5,437	12,100	0	7,609	13,846	27,833	0	0	0	0	0	2,414	11,321	1,015	0	300	0	81,875	8,188	73,687
1050602	177	2,599	3,840	0	4,016	720	2,993	0	0	3,960	0	0	355	1,500	311	0	150	0	20,444	2,044	18,400
1050604	YYY	1,059	2,360	0	1,350	11,600	0	0	0	0	0	0	23,356	37	88	0	75	0	39,925	0	39,925
1050603	208	2,302	2,660	0	3,782	0	0	0	0	0	0	0	193	3,963	311	0	150	0	13,361	1,336	12,025
1050531	YYY	2,838	7,080	0	7,092	5,400	2,395	0	0	0	0	0	6,162	5,397	528	0	150	0	37,042	0	37,042
1050527	13002	4,580	9,740	0	3,585	240	9,897	0	0	1,320	0	0	276	14,447	883	0	375	0	45,343	0	45,343
1050604	17503	2,084	2,360	0	4,788	240	4,555	0	0	4,930	0	0	3,969	1,071	264	0	75	0	24,336	0	24,336
1050602	183	2,543	3,540	0	3,674	7,202	0	0	0	0	0	0	136	2,373	399	0	150	0	20,017	2,002	18,015
1050527	207	5,681	10,040	0	8,348	11,980	0	0	0	0	0	0	597	5,424	883	0	300	0	43,253	4,325	38,928
1050531	17404	3,848	7,380	0	3,698	480	3,872	0	0	3,960	0	0	2,874	4,836	663	0	375	0	31,986	3,199	28,787
1050604	208	1,412	3,540	0	2,370	0	150	0	0	0	0	0	75	557	264	0	75	0	8,443	844	7,599
1050522	207	7,407	8,622	0	9,657	20,362	31,025	0	0	2,640	0	0	5,080	5,646	1,323	0	375	0	92,137	9,214	82,923
1050529	YYY	4,264	10,620	0	6,892	6,155	3,600	0	0	0	16,400	0	408	811	792	0	150	0	50,092	0	50,092
1050509		12,755	34,520	0	23,291	64,049	10,236	0	0	10,775	49,200	0	3,596	24,508	2,599	0	600	0	236,129	0	236,129
1050506	17203	12,892	18,363	0	24,516	27,060	18,216	0	0	5,980	0	0	17,440	7,288	2,860	0	825	0	135,440	14,368	121,072
1050605	18802	1,742	2,660	0	2,845	440	286	0	0	2,640	0	0	223	361	311	0	150	0	11,658	1,166	10,492
1050603	17404	2,529	2,960	0	1,914	240	338	0	0	0	0	0	322	1,524	399	0	75	0	10,301	0	10,301
1050514	320	11,169	28,320	6,040	12,839	19,582	3,889	0	7,000	0	0	0	1,295	32,223	2,247	0	600	0	125,204	0	125,204
1050601	183	4,745	8,260	0	6,233	680	420	0	0	0	0	0	348	8,006	704	0	225	0	29,621	2,962	26,659
1050601	17603	4,940	22,740	0	15,779	440	4,599	0	0	29,410	0	0	3,471	27,023	663	1,031	450	0	110,546	11,055	99,491
1050604	YYY	1,765	4,720	0	4,322	20,450	1,635	0	0	0	0	0	3,809	141	352	0	0	0	37,194	0	37,194
1050520	41601	11,598	63,000	2,720	17,605	19,102	22,015	0	0	4,620	0	0	7,382	33,161	1,719	0	705	0	183,627	18,363	165,264
1050517	20201	9,917	25,080	0	13,491	7,442	0	0	0	2,640	0	0	1,034	25,632	1,983	0	600	0	87,819	8,782	79,037
1050602	208	2,938	6,200	0	7,183	240	22,763	0	0	0	0	0	321	942	575	0	150	0	41,312	0	41,312
1050607	20201	1,568	2,360	0	2,604	0	0	0	0	0	0	0	115	863	311	0	75	0	7,896	0	7,896
1050530	20201	6,913	42,540	0	14,338	640	9,905	0	0	14,760	0	0	5,365	31,370	971	0	900	0	127,702	12,770	114,932
1050607	177	2,109	2,660	0	4,558	240	9,795	0	0	1,320	8,200	0	2,472	2,555	311	0	300	0	34,520	0	34,520
1050608	206	1,742	2,360	0	4,813	0	0	0	0	0	0	0	166	405	223	0	75	0	9,784	978	8,806
1050605	20202	2,815	3,840	0	5,262	240	5,216	0	0	4,930	0	0	4,664	38,485	443	0	150	0	66,045	6,605	59,440
1050606	17404	2,095	2,660	0	3,962	240	0	0	0	0	0	0	153	905	267	0	75	0	10,357	1,036	9,321
1050604	YYY	2,471	3,438	0	1,746	20,450	1,214	0	0	8,590	0	0	18,942	2,784	616	0	75	0	60,326	0	60,326
1050605	YYY	2,485	5,900	0	2,105	400	6,071	4,636	0	0	0	6,075	4,411	7,091	528	0	150	0	39,852	0	39,852
1050608	177	1,893	1,180	0	2,940	7,442	30	0	0	0	0	0	125	1,101	223	0	75	0	15,009	1,501	13,508
1050520	20201	9,376	24,780	0	16,554	840	15,097	0	0	9,335	0	0	1,270	6,950	1,936	0	450	0	86,588	0	86,588
1050603	17404	3,507	4,038	0	3,810	240	3,582	0	0	4,660	0	0	308	3,506	707	0	300	0	24,658	0	24,658
1050610	YYY	706	1,180	0	3,182	6,155	90	0	0	0	0	0	0	4	88	0	0	0	11,405	1,141	10,264
1050608	20401	2,232	3,540	0	4,831	600	870	0	0	0	0	0	131	1,026	352	0	150	0	13,732	1,373	12,359
1050606	20201	3,157	5,020	0	4,511	440	5,066	0	0	1,320	0	0	334	16,338	487	0	180	0	36,853	0	36,853
1050603	17404	3,955	8,260	0	15,693	7,015	2,136	0	0	0	0	0	939	1,141	704	0	375	0	40,218	4,022	36,196
1050528	41601	7,085	19,953	0	18,348	19,982	5,802	0	0	8,970	0	0	8,631	12,049	1,279	0	675	0	102,774	10,277	92,497
1050609	18905	1,670	2,360	0	3,210	240	0	0	0	0	0	0	136	960	264	0	75	0	8,915	892	8,023
1050605	17403	2,801	2,592	0	8,292	240	0	0	0	3,960	0	0	336	9,481	531	0	225	0	28,458	0	28,458
1050608	18802	3,523	3,540	0	2,790	240	240	0	0	4,660	0	0	2,727	1,287	352	0	75	0	19,434	0	19,434
1050606	20201	2,448	4,140	0	2,937	240	5,081	0	0	0	0	0	179	6,572	443	0	150	0	22,190	0	22,190
1050607	183	2,288	3,840	0	1,277	480	210	0	0	0	0	0	165	7,026	399	0	150	0	15,835	1,584	14,251
1050605	207	3,535	5,900	0	5,519	7,202	0	0	0	0	0	0	224	1,687	575	0	225	0	24,867	2,487	22,380
1050607	17404	2,789	3,840	0	4,838	240	695	0	0	2,370	0	0	170	2,166	399	0	75	0	17,582	1,758	15,824
1050607		2,655	4,720	0	5,850	7,442	120	0	0	1,320	0	0	147	479	399	0	150	0	23,282	0	23,282
1050605	182	2,994	5,900	0	8,847	480	0	0	0	0	0	0	235	1,560	575	0	225	0	20,816	2,082	18,734
1050610	YYY	1,426	2,360	0	1,190	11,600	1,180	0	0	0	0	0	24,383	367	176	0	75	0	42,757	0	42,757
1050606	177	3,168	5,900	0	7,452	0	90	0	0	0	0	0	258	1,728	531	0	150	0	19,277	1,928	17,349
1050609	17504	1,670	2,360	0	5,014	240	0	0	0	0	0	0	145	1,423	223	0	75	0	11,150	1,115	10,035
1050601	YYY	6,774	33,860	0	5,529	24,740	3,414	0	0	1,320	0	0	21,886	761	1,015	0	300	0	99,599	0	99,599
1050608	207	2,585	5,020	0	3,803	7,442	22,641	0	0	0	0	0	73	620	487	0	75	0	42,746	4,275	38,471
1050609	20401	2,232	2,960	0	3,624	240	60	0	0	0	0	0	95	911	355	0	75	0	10,552	1,055	9,497
1050610	17404	1,568	2,660	0	1,456	240	0	0	0	0	0	0	155	2,081	311	0	300	0	8,771	877	7,894
1050609	YYY	2,499	4,720	0	2,540	6,155	0	0	0	0	0	0	138	645	440	0	0	0	17,137	0	17,137
1050528	47501	10,700	65,860	1,920	31,026	5,000	21,607	2,081	0	2,640	3,960	0	18,385	78,406	1,496	0	1,800	0	244,881	24,488	220,393
1050605	20201	3,507	3,738	0	6,476	11,740	30	0	0	2,640	0	0	1,443	6,180	707	0	225	0	36,686	0	36,686
1050609	YYY	1,765	4,720	0	2,173	20,450	1,240	0	0	9,240	0	0	18,914	2,478	352	0	75	0	61,407	0	61,407
1050608	20201	3,496	3,438	0	2,836	240	5,336	0	0	3,340	0	0	388	21,461	616	0	75	0	41,226	0	41,226
1050609	YYY	2,118	5,900	0	2,350	8,000	2,120	0	0	0	0	0	23,811	646	528	0	75	0	45,548	0	45,548
1050609	178	2,585	5,020	0	4,700	240	0	0	0	1,320	0	0	129	724	399	0	150	0	15,267	1,527	13,740
1050607	YYY	3,888	7,080	0	6,781	7,640	60	0	0	3,960	0	0	193	2,014	572	0	150	0	32,338	0	32,338
1050608	182	4,230	7,080	0	8,295	240	2,243	0	0	1,320	0	0	478	3,477	616	0	225	0	28,204	2,820	25,384
1050610	YYY	2,132	2,292	0	4,732	200	0	0	0	0	0	0	29	42	88	0	75	0	9,590	0	9,590
1050606	208	4,583	7,380	0	7,335	18,942	1,050	0	0	0	0	0	302	1,588	572	0	225	0	41,977	4,198	37,779
1050612	17404	2,232	3,540	0	6,613	240	0	0	0	2,640	0	0	228	1,163	311	0	150	0	17,117	1,712	15,405
1050613	208	1,793	2,360	0	3,232	6,155	180	0	0	0	0	0	73	371	264	0	75	0	14,503	1,450	13,053
1050610	20201	3,894	11,120	0	6,395	240	6,551	0	0	9,280	0	0	797	35,962	528	0	225	0	74,992	7,499	67,493
1050609	YYY	3,863	7,080	0	9,436	27,692	1,427	0	0	1,320	0	0	20,637	4,685	616	0	600	0	77,356	0	77,356
1050612	YYY	1,412	3,540	0	1,100	1,400	990	0	0	0	0	0	1,510	581	264	0	75	0	10,872	1,087	9,785
1050610	20201	2,274	5,020	0	3,842	240	0	0	0	0	0	0	170	586	487	0	150	0	12,769	1,277	11,492
1050613	YYY	1,059	2,360	0	1,480	11,600	850	0	0	0	0	0	24,640	149	264	0	75	0	42,477	0	42,477
1050614	17403	2,098	1,180	0	1,304	240	30	0	0	0	0	0	85	191	135	0	75	0	5,338	534	4,804
1050612	YYY	1,779	3,540	0	0	7,600	1,120	0	0	0	4,100	0	1,298	173	352	0	75	0	20,037	0	20,037
1050612	20201	2,232	3,540	0	3,477	240	0	0	0	0	0	0	105	551	352	0	150	0	10,647	1,065	9,582
1050607	207	3,700	8,560	0	4,143	13,942	210	0	0	0	0	0	304	1,020	751	0	225	0	32,855	3,286	29,569
1050610	182	2,838	7,080	0	5,782	200	766	0	320	0	0	0	29	460	616	0	0	0	18,091	0	18,091
1050612	20401	1,765	4,720	0	2,841	200	30	12,544	0	0	0	6,075	111	2,071	440	0	150	0	30,947	3,095	27,852
1050610	178	3,154	7,380	0	8,317	240	30	0	0	1,320	0	0	329	2,064	663	0	225	0	23,722	2,372	21,350
1050615	20401	1,823	2,360	0	1,968	240	60	0	0	0	0	0	86	560	223	0	75	0	7,395	740	6,655
1050613	17403	2,095	3,840	0	9,099	1,710	300	0	0	2,640	0	0	181	1,550	399	0	225	0	22,039	2,204	19,835
1050611	17404	3,389	7,080	0	2,479	240	3,852	0	0	1,845	0	0	335	4,292	616	0	225	0	24,353	2,435	21,918
1050612	17404	2,585	5,020	0	7,686	240	0	0	0	2,115	0	0	206	2,354	487	0	150	0	20,843	0	20,843
1050612	17404	2,729	2,865	0	3,466	240	3,277	0	0	2,640	0	0	319	1,949	528	0	150	0	18,163	1,816	16,347
1050604	206	5,098	14,460	0	5,864	7,202	90	0	0	0	0	0	219	1,412	1,147	0	375	0	35,867	3,587	32,280
1050602	20401	6,673	17,700	0	8,608	6,195	2,550	0	0	0	0	0	434	2,955	1,408	0	375	0	46,898	4,690	42,208
1050610	207	4,067	8,260	0	4,111	240	22,583	0	0	0	0	0	393	4,649	751	0	225	0	45,279	4,528	40,751
1050615	20401	2,190	2,360	0	4,041	7,202	0	0	0	0	0	0	179	4,604	311	0	150	0	21,037	2,104	18,933
1050612	41601	2,938	4,140	0	6,049	6,435	0	0	0	0	0	0	289	1,488	443	0	225	0	22,007	2,201	19,806
1050615	177	1,921	3,540	0	2,809	240	2,997	0	0	1,320	0	0	174	1,521	264	0	150	0	14,936	1,494	13,442
1050614	YYY	2,095	1,719	0	9,944	6,435	120	0	0	1,320	0	0	216	243	399	0	150	0	22,641	0	22,641
1050615	17403	2,023	3,540	0	7,325	480	0	0	0	0	0	0	68	534	352	0	150	0	14,472	0	14,472
1050601	20401	6,264	11,220	0	6,759	480	120	0	0	0	0	0	269	905	886	0	375	0	27,278	2,728	24,550
1050613	178	2,790	3,840	0	4,370	240	195	0	0	0	0	0	212	2,150	311	0	75	0	14,183	1,418	12,765
1050615	YYY	2,146	3,540	0	2,822	6,155	180	0	0	0	0	0	43	391	264	0	150	0	15,691	0	15,691
1050618	17403	1,756	1,180	0	1,684	240	0	0	0	1,320	0	0	157	335	176	0	0	0	6,848	0	6,848
1050615	YYY	2,641	2,292	0	8,851	480	40	0	0	0	0	0	77	1,476	399	0	75	0	16,331	0	16,331
1050613	20201	2,801	2,892	0	3,292	480	0	0	0	970	0	0	47	1,144	531	0	75	0	12,232	1,223	11,009
1050617	182	2,451	2,360	0	3,820	480	30	0	0	0	0	0	222	1,030	264	0	75	0	10,732	0	10,732
1050617	20401	2,451	2,360	0	3,322	480	0	0	0	0	0	0	92	375	223	0	75	0	9,378	938	8,440
1050602	183	8,586	20,060	0	10,141	2,605	1,747	0	0	0	0	0	507	6,578	1,584	1,031	450	0	53,289	5,329	47,960
1050612	20201	4,011	8,260	0	6,278	6,195	0	0	0	0	0	0	159	15,860	663	0	75	0	41,501	4,150	37,351
1050616	182	2,613	2,360	0	3,007	480	150	0	0	0	0	0	315	3,863	311	0	150	0	13,249	0	13,249
1050617	YYY	1,059	2,360	0	12,920	200	1,540	0	0	0	0	0	666	19	176	0	0	0	18,940	0	18,940
1050610	YYY	4,420	9,440	0	10,545	240	2,332	0	0	0	0	0	239	4,655	839	0	525	0	33,235	0	33,235
1050612	41601	5,767	12,300	0	17,419	20,182	3,685	0	0	6,290	0	0	8,075	11,315	663	0	225	0	85,921	8,592	77,329
1050613	YYY	3,572	7,080	0	5,132	20,650	877	0	0	0	0	0	18,854	3,971	616	0	0	0	60,752	0	60,752
1050616	20201	2,437	3,540	0	3,255	240	4,871	0	0	1,320	0	0	4,399	14,651	352	0	150	0	35,215	0	35,215
1050617	YYY	1,059	2,360	0	1,300	200	510	0	0	0	0	0	29	18	88	0	75	0	5,639	0	5,639
1050614	YYY	2,641	5,020	0	7,131	7,202	0	0	0	795	0	0	162	1,084	487	0	150	0	24,672	0	24,672
1050614	YYY	2,118	5,900	0	1,690	11,600	1,000	0	0	0	0	0	23,842	182	528	0	75	0	46,935	0	46,935
1050613	208	3,521	6,500	0	7,520	240	30	0	0	0	0	0	434	3,073	531	0	225	0	22,074	2,207	19,867
1050613	18805	3,154	3,465	0	13,107	240	5,540	0	0	5,280	0	0	506	3,218	619	0	225	0	35,354	3,535	31,819
1050618	YYY	1,059	2,360	0	1,330	7,800	0	0	0	0	0	0	23,356	159	176	0	75	0	36,315	0	36,315
1050608	17403	4,546	5,900	0	14,740	720	870	0	0	6,600	0	0	358	2,468	663	0	150	0	37,015	3,702	33,313
1050617	183	2,288	3,540	0	2,283	480	90	0	0	0	0	0	229	2,552	352	0	150	0	11,964	1,196	10,768
1050619	YYY	706	1,180	0	1,190	11,700	30	0	0	0	0	0	0	0	0	0	0	0	14,806	1,481	13,325
1050615	207	2,896	4,720	0	4,650	7,442	22,853	0	0	0	0	0	191	2,230	487	0	150	0	45,619	4,562	41,057
1050613	18905	2,980	7,080	0	7,876	240	150	0	0	0	0	0	187	926	619	0	225	0	20,283	2,028	18,255
1050616	183	2,585	4,720	0	3,252	1,685	30	0	0	0	0	0	82	534	399	0	150	0	13,437	1,344	12,093
1050613	207	3,521	6,500	0	7,206	7,202	22,613	0	0	0	0	0	430	4,118	619	0	225	0	52,434	5,243	47,191
1050616	177	2,585	4,720	0	3,592	240	30	0	0	1,320	0	0	149	463	399	0	75	0	13,573	0	13,573
1050614	17403	3,154	3,738	0	3,554	2,605	240	0	0	0	0	0	175	327	619	0	150	0	14,562	1,456	13,106
1050619	18905	1,059	2,360	0	2,881	200	0	12,544	0	0	0	0	83	465	176	0	75	0	19,843	1,984	17,859
1050617	YYY	1,765	4,720	0	1,340	20,450	1,240	0	0	0	0	0	18,871	4,582	176	0	0	0	53,144	0	53,144
1050616	18905	3,463	5,900	0	6,576	7,402	400	0	0	0	0	0	310	3,575	487	0	150	0	28,263	2,826	25,437
1050616	191	2,485	5,900	0	2,904	7,800	1,000	0	0	0	4,100	0	64	343	528	0	75	0	25,199	0	25,199
1050616	20201	2,938	5,900	0	4,343	6,195	5,291	0	0	2,640	0	0	328	19,178	528	0	150	0	47,491	0	47,491
1050615	17504	3,291	7,080	0	4,662	240	3,537	0	0	1,320	0	0	341	3,392	575	0	225	0	24,663	2,466	22,197
1050618	YYY	1,779	3,540	0	2,626	20,450	1,270	0	0	0	0	0	18,885	2,312	352	0	75	0	51,289	0	51,289
1050619	17302	1,059	1,146	0	5,082	200	60	12,544	0	0	0	6,075	73	480	176	0	75	0	26,970	2,697	24,273
1050608	182	7,446	14,092	0	12,582	2,400	5,439	0	880	0	0	0	586	13,012	1,279	0	375	0	58,091	5,809	52,282
1050617	20201	2,815	4,720	0	2,788	240	180	0	0	0	8,200	0	226	1,442	443	0	150	0	21,204	2,120	19,084
1050618	208	2,910	3,840	0	3,837	12,386	577	0	0	0	0	0	1,988	3,996	399	0	150	0	30,083	0	30,083
1050614	208	4,608	8,260	0	9,347	11,762	3,010	0	0	0	0	0	3,321	4,017	751	0	225	0	45,301	4,530	40,771
1050620	YYY	1,059	2,360	0	1,150	0	0	0	0	0	0	0	137	56	264	0	2,275	0	7,301	0	7,301
1050618	17404	2,095	1,746	0	6,942	7,442	3,808	0	0	5,010	0	0	336	3,958	311	0	300	0	31,948	3,195	28,753
1050607	YYY	7,079	8,322	2,720	12,305	6,795	13,687	0	0	1,320	0	0	537	3,148	1,367	0	675	0	57,955	0	57,955
1050617	205	2,801	5,900	0	8,120	240	420	0	0	0	0	0	76	465	487	0	150	0	18,659	1,866	16,793
1050619	20201	2,448	2,019	0	2,066	480	5,081	0	0	0	0	0	270	3,739	443	0	75	0	16,621	0	16,621
1050616	207	4,889	9,440	0	4,987	4,760	2,210	0	0	0	0	0	2,212	3,181	751	0	225	0	32,655	3,266	29,389
1050606	18805	7,746	10,041	0	8,597	240	8,145	0	0	7,610	0	0	584	16,264	1,631	1,031	225	0	62,114	6,211	55,903
1050523	41601	18,475	89,474	0	50,674	9,442	9,625	0	0	10,130	0	0	17,844	118,398	2,904	0	2,505	0	329,471	0	329,471
1050621	183	2,437	3,540	0	3,221	7,202	30	0	0	0	0	0	47	1,106	311	0	75	0	17,969	1,797	16,172
1050622	182	1,742	2,360	0	5,276	7,442	0	0	0	0	0	0	196	1,205	264	0	75	0	18,560	1,856	16,704
1050619	20201	2,274	2,319	0	2,512	240	4,931	0	0	2,290	0	0	910	18,870	443	0	150	0	34,939	0	34,939
1050609	YYY	8,638	38,580	0	9,474	31,702	4,072	0	0	5,630	0	0	19,842	21,433	1,367	0	480	0	141,218	0	141,218
1050619	206	2,994	5,900	0	3,731	690	0	0	0	0	0	0	168	322	487	0	150	0	14,442	1,444	12,998
1050619	178	2,801	5,900	0	10,357	480	0	0	0	0	0	0	235	836	487	0	150	0	21,246	2,125	19,121
1050620	183	3,008	4,720	0	4,528	440	0	0	0	0	0	0	223	4,178	440	0	150	0	17,687	1,769	15,918
1050619	17504	2,448	5,020	0	5,557	7,442	120	0	0	0	0	0	96	1,335	487	0	150	0	22,655	2,266	20,389
1050616	17404	4,378	3,738	0	6,443	5,040	4,857	0	0	2,640	0	0	493	4,277	707	0	375	0	32,948	0	32,948
1050622	183	2,288	3,540	0	4,294	480	240	0	0	0	0	0	203	2,092	352	0	150	0	13,639	1,364	12,275
1050622	17404	1,921	3,540	0	4,761	1,300	746	0	0	0	0	0	175	596	311	0	150	0	13,500	0	13,500
1050619	YYY	3,168	6,200	0	17,010	7,202	1,840	0	0	0	0	0	958	3,826	531	0	300	0	41,035	0	41,035
1050620	07901	3,008	4,140	0	3,287	240	570	0	0	0	0	0	296	5,147	399	0	150	0	17,237	0	17,237
1050619	205	3,168	2,592	0	3,978	7,202	180	0	0	0	0	0	100	3,559	487	0	225	0	21,491	2,149	19,342
1050621	20201	2,655	1,719	0	5,382	240	1,594	0	0	1,320	0	0	365	2,807	399	0	180	0	16,661	1,666	14,995
1050620	17404	3,562	21,560	0	3,575	0	1,020	0	0	0	0	0	206	3,118	528	0	300	0	33,869	3,387	30,482
1050620	20201	3,168	3,165	0	8,651	240	1,178	0	0	2,020	0	0	493	29,626	575	0	255	0	49,371	4,937	44,434
1050624	YYY	1,059	2,360	0	970	200	60	0	0	0	0	0	122	2	176	0	2,200	0	7,149	0	7,149
1050601	41601	11,833	29,500	0	11,041	16,502	10,331	0	0	13,820	0	0	19,025	14,802	2,247	0	675	0	129,776	0	129,776
1050619	177	4,255	7,380	1,560	6,963	7,442	9,222	0	0	2,640	12,300	0	285	3,380	663	0	300	0	56,390	0	56,390
1050623	17404	2,084	1,446	0	5,284	240	930	0	0	2,370	0	0	310	3,228	267	0	150	0	16,309	1,631	14,678
1050624	YYY	1,059	2,360	0	1,560	7,800	77	0	0	4,620	0	0	23,376	57	176	0	75	0	41,160	0	41,160
1050624	206	1,059	2,360	0	8,158	0	520	0	0	0	0	0	708	20	176	0	75	0	13,076	1,308	11,768
1050620	178	3,168	2,892	1,360	6,158	240	1,732	0	0	0	0	0	288	13,072	531	0	150	0	29,591	2,959	26,632
1050621	YYY	3,008	4,720	0	3,338	440	960	0	0	0	0	0	164	4,159	487	0	150	0	17,426	0	17,426
1050621	208	2,641	3,199	0	4,835	6,962	25,373	0	0	0	0	0	9,642	6,593	487	0	150	0	59,882	5,988	53,894
1050624	YYY	1,059	2,360	0	1,590	11,700	0	0	0	0	0	0	29	0	0	0	0	0	16,738	0	16,738
1050622	17404	2,585	4,720	0	5,768	0	120	0	0	0	0	0	130	1,629	352	0	150	0	15,454	1,545	13,909
1050617	41601	4,947	10,920	0	8,321	240	390	0	0	0	0	0	447	11,419	883	0	330	0	37,897	3,790	34,107
1050620	207	3,888	3,738	0	8,117	22,722	1,295	0	0	0	0	0	4,949	4,645	663	0	150	0	50,167	5,017	45,150
1050622	20401	3,157	2,019	0	9,058	7,442	735	0	0	0	0	0	225	1,174	443	0	150	0	24,403	0	24,403
1050625	182	2,109	2,360	0	5,568	7,442	77	0	0	0	0	0	184	1,832	223	0	75	0	19,870	1,987	17,883
1050620	20201	3,154	3,738	0	3,934	240	5,171	0	0	0	0	0	388	21,142	663	0	525	0	38,955	0	38,955
1050619	207	4,936	4,584	0	5,293	7,442	153	0	0	0	0	0	264	6,889	792	0	225	0	30,578	3,058	27,520
1050625	207	1,389	1,480	0	8,489	240	0	0	0	1,320	0	0	163	821	132	0	75	0	14,109	1,411	12,698
1050623	20401	2,952	4,720	0	8,312	11,740	1,320	0	0	0	0	0	171	1,855	440	0	150	0	31,660	0	31,660
1050624	17203	1,921	3,540	0	1,874	6,435	30	0	0	0	0	0	61	186	352	0	150	0	14,549	1,455	13,094
1050625	YYY	1,059	1,146	0	11,156	200	520	0	0	0	0	0	720	88	176	0	75	0	15,140	1,514	13,626
1050623	YYY	3,686	4,720	0	2,496	6,195	1,650	0	0	0	0	0	175	858	440	0	150	0	20,370	2,037	18,333
1050623	178	2,585	4,720	0	3,500	480	270	0	0	0	0	0	235	1,371	440	0	150	0	13,751	1,375	12,376
1050620	207	3,602	7,080	0	4,184	0	0	0	0	0	0	0	291	8,675	616	0	225	0	24,673	2,467	22,206
1050626	17203	706	1,180	0	10,525	200	90	0	0	0	0	0	98	307	88	0	75	0	13,269	1,327	11,942
1050622	208	3,714	3,438	0	4,389	480	30	0	0	0	0	0	346	8,183	616	0	225	0	21,421	2,142	19,279
1050626	YYY	1,059	2,360	0	2,511	200	30	12,544	0	0	0	6,075	97	2,238	264	0	75	0	27,453	0	27,453
1050625	17404	2,330	3,540	0	3,148	240	3,442	0	0	1,320	0	0	194	2,802	311	0	450	0	17,777	1,778	15,999
1050618	331	6,048	10,920	0	4,949	5,040	40	0	0	0	0	0	482	8,805	927	0	300	0	37,511	3,751	33,760
1050626	18805	1,059	2,360	0	2,841	200	30	12,544	0	0	0	6,075	63	473	264	0	75	0	25,984	2,598	23,386
1050625	20201	1,742	2,660	0	3,602	7,202	0	0	0	0	0	0	62	957	311	1,031	75	0	17,642	1,764	15,878
1050626	17403	1,935	2,660	0	4,006	240	0	0	0	0	0	0	72	292	267	0	75	0	9,547	955	8,592
1050619	41601	5,916	10,920	0	9,609	5,280	7,860	0	320	0	0	0	2,990	11,743	927	0	330	0	55,895	5,590	50,305
1050626	208	2,190	1,146	0	2,374	7,442	90	0	0	0	0	0	120	780	311	0	75	0	14,528	1,453	13,075
1050624	YYY	2,471	7,080	0	5,019	20,450	1,210	0	0	0	0	0	18,969	3,100	440	0	150	0	58,889	5,889	53,000
1050628	183	1,742	2,360	0	3,998	480	127	0	0	0	0	0	189	474	264	0	75	0	9,709	971	8,738
1050523	12201	6,750	31,500	0	17,080	640	5,535	0	3,240	2,640	0	0	908	6,718	880	0	900	0	76,791	7,679	69,112
1050529	12202	2,813	13,980	0	20,408	1,160	1,050	0	0	0	0	0	5,460	2,010	311	0	225	0	47,417	4,742	42,675
1050529	12101	5,595	20,380	0	13,192	440	2,978	0	0	0	8,200	0	283	2,961	399	1,031	300	0	55,759	0	55,759
1050527	07801	4,827	15,665	0	14,500	7,202	2,730	0	0	0	0	0	163	2,634	663	0	225	0	48,609	4,861	43,748
1050528	12702	3,168	6,200	0	7,666	5,000	2,670	0	0	0	0	0	120	1,883	575	0	225	0	27,507	0	27,507
1050526	13903	3,644	7,680	0	16,991	240	370	0	0	0	0	0	467	2,011	619	0	225	0	32,247	3,225	29,022
1050531	12201	2,829	3,840	0	21,569	1,160	240	0	0	0	4,100	0	7,387	1,716	399	0	600	0	43,840	4,384	39,456
1050602	47803	1,426	1,146	0	1,450	28,778	707	0	0	0	0	0	66,811	1,119	264	0	75	0	101,776	0	101,776
1050601	143	2,514	3,540	0	7,642	240	1,000	0	0	0	0	0	59	138	311	0	0	0	15,444	1,544	13,900
1050602	00501	1,412	3,540	0	12,334	34,850	917	0	0	0	0	0	80,397	2,684	352	0	75	0	136,561	13,656	122,905
1050604	13002	1,426	1,146	0	2,571	13,450	1,067	0	0	0	0	0	22,594	1,072	264	0	75	0	43,665	4,367	39,298
1050528	07903	5,695	9,440	0	8,076	12,350	2,850	0	0	0	0	0	2,169	4,430	839	0	300	0	46,149	4,615	41,534
1050530	12702	4,216	7,380	0	8,620	440	2,340	0	0	2,640	0	0	740	3,400	660	0	750	0	31,186	3,119	28,067
1050604	08801	2,843	2,660	0	6,599	440	1,480	0	0	0	0	0	107	4,482	223	0	300	0	19,134	1,913	17,221
1050602	24002	2,585	4,720	0	7,121	240	270	0	0	0	0	0	93	1,522	487	0	225	0	17,263	0	17,263
1050531	01502	3,521	7,380	0	15,370	600	120	0	0	0	0	0	152	1,559	663	0	225	0	29,590	2,959	26,631
1050603	11802	1,765	2,292	0	1,100	200	450	8,391	0	0	0	0	75,812	1,066	440	0	150	0	91,666	9,167	82,499
1050603	39502	3,219	5,900	0	6,560	200	1,230	0	0	5,010	0	0	158	732	528	0	150	0	23,687	2,369	21,318
1050519	47802	10,427	28,820	1,170	30,053	7,540	9,800	23,803	0	9,105	4,100	3,224	3,037	16,614	1,807	0	705	0	150,205	15,021	135,184
1050604	116	1,765	2,292	0	2,225	400	540	10,976	0	0	0	0	123,856	408	440	0	150	0	143,052	14,305	128,747
1050604	12701	2,095	2,960	0	7,166	480	2,010	0	0	0	0	0	610	1,924	355	0	900	0	18,500	1,850	16,650
1050605	20202	2,109	2,360	0	7,005	7,442	1,410	0	0	0	0	0	97	383	311	0	0	0	21,117	2,112	19,005
1050529	47501	11,062	70,400	3,120	38,291	1,640	15,641	0	0	1,320	0	0	5,705	42,244	1,103	0	1,155	0	191,681	0	191,681
1050607	01405	3,582	19,200	1,170	6,665	6,500	3,355	0	0	0	0	0	810	3,867	352	0	480	0	45,981	0	45,981
1050606	14402	1,921	3,840	0	7,056	880	1,260	0	0	0	0	0	311	917	399	0	375	0	16,959	1,696	15,263
1050607	14502	1,921	3,540	0	8,440	240	150	0	0	0	0	0	91	49	47	0	75	0	14,553	1,455	13,098
1050602	13102	4,308	9,440	0	7,222	7,059	210	0	0	0	0	0	157	1,240	839	0	900	0	31,375	0	31,375
1050607	XXX	1,921	3,540	0	13,409	240	60	0	0	0	0	0	50	221	589	0	75	0	20,105	2,011	18,094
1050524	277	7,404	8,922	0	19,681	980	10,591	0	0	0	0	0	41,977	4,540	1,499	0	555	0	96,149	9,615	86,534
1050607	14403	3,064	3,840	0	5,664	480	3,355	0	0	0	0	0	2,558	791	399	0	750	0	20,901	2,090	18,811
1050607	09902	3,535	6,200	0	8,464	440	2,218	0	0	0	0	0	456	2,763	575	0	450	0	25,101	2,510	22,591
1050607	12701	6,752	27,960	0	16,251	840	6,972	0	0	4,620	0	0	1,068	11,957	616	0	300	0	77,336	7,734	69,602
1050606	116	3,154	6,200	0	10,888	1,360	12,913	10,976	0	0	0	0	126,007	717	619	0	225	0	173,059	17,306	155,753
1050609	089	3,319	2,019	0	7,673	690	2,933	0	0	0	0	0	884	3,567	443	0	450	0	21,978	2,198	19,780
1050613	12101	2,709	6,400	0	6,896	240	5,007	0	0	0	0	0	2,845	794	176	0	255	0	25,322	0	25,322
1050610	12701	2,095	2,019	0	10,200	240	3,100	0	0	0	0	0	221	3,483	311	0	375	0	22,044	2,204	19,840
1050612	13102	1,059	2,360	0	1,300	13,450	1,210	0	0	0	0	0	2,012	779	264	0	75	0	22,509	2,251	20,258
1050610	14403	2,529	4,720	0	5,282	240	480	0	0	1,940	0	0	131	363	440	0	150	0	16,275	1,628	14,647
1050608	142	4,025	7,380	0	9,282	4,040	1,470	0	0	0	0	0	90	958	663	0	150	0	28,058	2,806	25,252
1050612	09601	2,757	3,540	0	11,181	440	1,980	0	0	2,640	0	0	265	1,745	311	0	150	0	25,009	2,501	22,508
1050611	018	2,448	4,720	0	10,390	240	600	0	0	0	0	0	47	463	440	0	75	0	19,423	0	19,423
1050616	12301	1,737	6,400	0	6,520	6,482	2,022	0	0	1,320	0	0	3,969	2,830	88	0	225	0	31,593	3,159	28,434
1050615	14001	2,244	6,400	0	5,106	240	810	0	0	0	0	0	412	865	135	0	375	0	16,587	1,659	14,928
1050605	29401	5,653	6,030	0	15,371	440	6,147	0	0	1,320	0	0	596	2,986	1,059	0	300	0	39,902	3,990	35,912
1050611	141	4,255	7,080	0	15,037	4,800	1,312	0	320	0	0	0	309	1,593	575	344	375	0	36,000	3,600	32,400
1050612	116	2,118	2,865	0	1,250	400	781	10,976	0	0	0	0	121,988	923	528	0	150	0	141,979	14,198	127,781
1050613	14002	2,641	5,020	0	7,740	480	390	0	0	0	0	0	134	508	443	0	150	0	17,506	0	17,506
1050614	132	1,921	3,840	0	7,649	240	1,380	0	0	0	0	0	620	2,233	399	0	300	0	18,582	1,858	16,724
1050516	126	14,167	38,060	0	25,967	13,757	2,790	0	0	0	0	0	1,339	24,159	2,907	0	480	0	123,626	13,487	110,139
1050613	WWW	2,118	5,900	0	1,340	400	1,080	0	0	0	0	0	246	3,178	528	0	450	0	15,240	1,524	13,716
1050616	14001	2,232	3,840	0	12,826	240	1,710	0	0	0	0	0	355	1,919	589	0	525	0	24,236	2,424	21,812
1050615	12701	3,535	5,900	0	5,520	640	2,890	0	0	0	0	0	379	2,465	528	0	225	0	22,082	2,208	19,874
1050611	47501	10,332	57,600	3,510	14,625	1,080	18,955	0	0	1,320	0	0	851	11,404	880	0	750	0	121,307	12,131	109,176
1050612	018	3,644	8,560	0	15,876	640	927	0	0	1,320	0	0	106	7,883	707	0	75	0	39,738	0	39,738
1050617	13903	1,742	2,660	0	8,036	7,202	3,105	0	0	0	0	0	218	939	267	0	375	0	24,544	2,454	22,090
1050617	141	2,462	3,540	0	7,338	4,800	150	0	0	0	0	0	105	153	311	0	150	0	19,009	1,901	17,108
1050619	12202	1,624	1,480	0	23,644	1,160	490	0	0	0	0	0	7,580	920	223	0	225	0	37,346	3,735	33,611
1050606	39803	9,226	20,249	0	23,779	8,402	11,887	0	0	0	0	0	664	6,065	1,408	0	555	0	82,235	0	82,235
1050614	132	3,849	4,011	0	10,404	6,282	1,360	0	0	0	0	0	862	2,869	704	0	375	0	30,716	0	30,716
1050607	17404	6,029	12,271	0	10,046	200	4,280	0	0	3,960	0	0	261	3,876	1,320	0	375	0	42,618	4,262	38,356
1050613	13002	3,507	7,380	0	7,870	12,195	571	0	0	0	0	0	691	1,491	707	0	1,050	0	35,462	3,546	31,916
1050620	12201	2,204	1,480	0	27,216	1,160	490	0	0	0	0	0	5,160	871	223	0	75	0	38,879	3,888	34,991
1050618	11501	2,491	9,940	0	1,450	1,000	5,309	10,976	0	0	0	0	247,498	760	440	0	150	0	280,014	28,001	252,013
1050618	142	2,462	3,840	0	10,735	6,282	460	0	0	0	0	0	387	162	308	0	75	0	24,711	2,471	22,240
1050605	13803	11,251	65,860	680	24,877	640	10,586	0	320	3,960	0	0	1,811	7,304	1,543	0	1,680	0	130,512	13,051	117,461
1050619	11502	2,448	5,020	0	10,381	880	1,904	10,976	0	0	0	0	273,450	2,101	487	0	300	0	307,947	30,795	277,152
1050625	24002	2,089	6,400	0	2,604	6,042	1,220	0	0	0	0	0	4,662	3,554	88	0	225	0	26,884	0	26,884
1050623	47903	1,059	1,146	780	1,800	16,750	1,446	0	0	0	0	0	14,072	657	264	0	75	0	38,049	3,805	34,244
1050622	12202	2,462	1,719	0	4,164	240	2,180	0	0	0	0	0	340	2,373	352	0	225	0	14,055	1,406	12,649
1050618	11701	3,917	13,480	1,360	5,188	400	9,940	8,391	0	0	0	0	8,926	2,420	704	0	225	0	54,951	0	54,951
1050622	14001	2,952	4,720	0	8,649	440	1,770	0	0	0	0	0	214	7,861	440	0	75	0	27,121	0	27,121
1050623	133	2,232	3,540	0	8,298	432	28	0	0	0	0	0	130	203	352	0	0	0	15,215	1,522	13,693
1050620	454	2,801	3,165	0	7,761	240	990	0	0	0	0	0	74	492	575	0	0	0	16,098	0	16,098
1050620	13002	4,608	8,560	0	14,180	6,195	510	0	0	0	0	0	525	3,225	707	0	930	0	39,440	3,944	35,496
1050614	116	10,527	76,332	0	30,995	2,360	11,454	10,976	0	0	0	0	132,990	9,440	1,320	0	1,605	0	287,999	28,800	259,199
1050625	116	1,765	2,292	0	1,980	400	550	10,976	0	0	0	0	121,902	1,075	440	0	150	0	141,530	14,153	127,377
1050626	12202	3,180	13,980	0	24,776	1,160	2,194	0	840	0	0	0	5,554	1,668	352	0	75	0	53,779	5,378	48,401
1050627	142	2,084	2,360	0	11,648	4,800	180	0	0	0	0	0	49	235	311	0	75	0	21,742	2,174	19,568
1050528	089	2,829	1,746	0	3,746	440	358	0	0	0	0	0	237	1,643	355	0	180	0	11,534	0	11,534
1050524	08003	4,067	8,560	0	3,823	640	1,920	0	0	0	0	0	311	4,990	751	0	75	0	25,137	2,514	22,623
1050524	090	4,594	9,440	0	3,441	440	1,940	0	0	0	0	0	303	7,310	792	0	255	0	28,515	2,852	25,663
1050530	082	1,059	2,360	0	7,150	400	180	0	0	0	0	0	35	370	264	0	75	0	11,893	0	11,893
1050520	08802	5,653	6,603	0	4,871	240	8,110	0	0	0	0	0	439	4,437	1,103	0	300	0	31,756	3,520	28,236
1050530	YYY	1,059	2,360	0	11,953	6,315	30	0	0	0	0	0	35	121	176	0	75	0	22,124	0	22,124
1050509	YYY	10,351	26,260	0	15,904	99,809	22,900	0	0	5,805	0	0	1,080	38,494	2,071	0	630	0	223,304	0	223,304
1050514	089	8,138	9,495	0	12,564	1,440	8,850	0	0	0	0	0	2,622	9,807	1,543	0	300	0	54,759	5,476	49,283
1050528	090	3,361	5,020	0	4,901	7,402	530	0	0	0	0	0	163	7,862	531	0	225	0	29,995	3,000	26,995
1050530		3,196	2,319	0	7,751	440	2,870	0	0	0	0	0	262	3,398	355	0	180	0	20,771	2,077	18,694
1050526	29901	4,583	8,260	0	5,277	6,395	3,180	0	0	0	0	0	301	5,412	751	0	225	0	34,384	3,438	30,946
1050502	41501	13,814	33,845	11,000	20,108	1,680	20,285	5,026	0	3,690	0	2,550	4,973	57,346	2,863	0	930	0	178,110	0	178,110
1050514	48301	10,166	23,600	6,800	7,649	840	21,623	0	6,240	0	0	6,075	1,609	7,110	1,807	0	480	0	93,999	9,400	84,599
1050529	10003	2,801	5,320	0	5,890	6,195	130	0	0	0	0	0	195	539	399	0	150	0	21,619	2,162	19,457
1050528	07903	3,191	4,011	0	2,725	400	990	0	0	0	0	0	228	4,842	616	0	180	0	17,183	1,718	15,465
1050601	08801	2,390	3,540	0	6,742	240	823	0	0	0	0	0	107	1,253	352	0	150	0	15,597	1,560	14,037
1050526	46801	5,242	10,013	2,380	7,670	5,000	15,160	14,902	0	0	0	2,850	4,816	3,298	880	0	375	0	72,586	7,259	65,327
1050521	07903	6,712	15,940	4,680	5,436	840	5,892	0	0	1,320	0	0	589	27,595	1,323	0	405	0	70,732	7,073	63,659
1050601	08802	4,053	4,720	0	2,828	240	730	0	0	0	0	0	131	6,670	399	0	150	0	19,921	1,992	17,929
1050605	09702	353	1,180	0	2,720	0	70	0	0	0	0	0	35	45	88	0	75	0	4,566	457	4,109
1050409	08701	3,971	7,080	2,340	2,650	400	8,309	0	960	0	0	0	372	2,196	616	0	225	0	29,119	0	29,119
1050601	08001	2,132	4,720	0	5,591	8,450	1,420	0	0	0	0	0	1,613	1,524	440	0	0	0	25,890	2,589	23,301
1050518	47501	12,775	73,440	6,240	17,227	5,800	27,657	0	0	0	0	0	3,096	23,192	1,672	1,031	1,335	0	173,465	17,347	156,118
1050514	07903	10,110	25,080	0	19,797	1,440	20,660	0	0	1,320	0	0	1,015	33,466	1,895	0	150	0	114,933	12,803	102,130
1050416	07903	20,403	56,940	18,670	22,953	2,440	65,072	0	11,320	19,530	0	0	3,545	25,127	4,315	0	930	0	251,245	0	251,245
1050603	YYY	1,059	2,360	0	870	3,699	150	0	0	0	0	0	34	62,322	1,185	0	450	0	72,129	0	72,129
1050521	47501	10,617	55,784	5,850	24,092	1,280	27,807	0	0	1,320	0	0	3,391	24,388	1,496	0	1,380	0	157,405	15,741	141,664
1050602	08802	3,263	4,720	0	3,592	240	2,600	0	0	0	0	0	125	6,674	440	0	150	0	21,804	2,180	19,624
1050604	YYY	1,059	1,146	0	1,220	3,293	180	0	0	0	0	0	165	27,959	1,185	0	300	0	36,507	0	36,507
1050602	08801	2,023	2,019	0	5,538	6,195	330	0	0	0	0	0	103	592	399	0	150	0	17,349	0	17,349
1050530	08802	3,888	3,738	0	3,986	240	4,500	0	0	0	0	0	278	4,727	663	0	225	0	22,245	2,225	20,020
1050602	089	2,966	3,840	780	6,256	680	2,869	0	0	0	0	0	282	1,559	399	0	150	0	19,781	0	19,781
1050528	07903	5,154	4,611	0	10,682	7,842	2,785	0	0	1,320	0	0	454	15,669	795	0	255	0	49,567	4,957	44,610
1050603	41601	2,711	2,660	680	5,791	240	3,720	0	0	0	0	0	132	9,151	311	0	180	0	25,576	2,558	23,018
1050604	YYY	1,426	2,360	0	1,320	5,458	150	0	0	0	0	0	97	7,553	1,185	0	450	0	19,999	0	19,999
1050513	08701	6,747	26,960	1,700	1,780	560	9,685	0	2,240	0	0	0	469	14,390	1,320	0	225	0	66,076	0	66,076
1050606	41601	1,807	1,180	0	3,970	200	2,490	0	0	0	0	0	147	709	176	0	75	0	10,754	0	10,754
1050601	07903	3,888	7,080	0	4,793	640	300	0	0	0	0	0	339	8,052	575	0	150	0	25,817	2,582	23,235
1050529	08002	4,998	10,620	0	15,151	6,555	2,536	2,573	1,200	0	0	6,075	410	15,169	880	0	300	0	66,467	0	66,467
1050525	07903	7,460	15,340	0	6,333	840	8,134	0	0	1,320	0	0	1,245	29,304	1,232	0	375	0	71,583	0	71,583
1050605	YYY	1,059	2,360	0	6,903	4,200	1,030	0	0	0	0	0	1,642	20	264	0	0	0	17,478	0	17,478
1050607	YYY	353	573	0	770	1,434	60	0	0	0	0	0	92	19,339	395	0	150	0	23,166	0	23,166
1050606	YYY	706	573	0	820	2,262	120	0	0	0	0	0	81	12,303	790	0	300	0	17,955	0	17,955
1050606	YYY	706	573	0	770	1,231	90	0	0	0	0	0	47	58,800	483	0	75	0	62,775	0	62,775
1050531	07903	3,888	3,438	2,340	7,169	4,800	5,911	2,081	0	795	12,300	0	1,746	2,087	663	0	180	0	47,398	0	47,398
1050601	07903	3,954	3,560	780	5,457	720	5,075	0	0	0	0	0	475	3,587	396	0	105	0	24,109	0	24,109
1050602	YYY	2,118	5,900	0	1,100	4,102	6,122	0	0	0	0	6,075	8,241	25,922	1,361	0	375	0	61,316	0	61,316
1050516	07903	10,979	26,260	7,110	13,120	1,240	12,863	0	0	0	41,000	0	631	15,816	2,071	0	525	0	131,615	0	131,615
1050524	089	7,079	8,322	0	9,866	840	10,757	0	0	0	0	0	2,503	5,135	1,367	1,031	300	0	47,200	4,720	42,480
1050524	YYY	6,749	17,700	0	11,249	61,168	900	0	0	1,320	0	0	295	20,268	1,408	0	300	0	121,357	0	121,357
1050525	08801	7,813	16,520	0	5,175	640	8,152	0	0	0	0	0	487	6,754	1,320	0	405	0	47,266	4,727	42,539
1050521	08003	8,505	19,480	5,650	7,283	400	14,223	0	0	1,320	0	0	560	24,972	1,587	1,031	450	0	85,461	0	85,461
1050606	YYY	2,451	2,360	0	2,416	240	4,106	0	0	0	0	0	155	8,375	264	0	105	0	20,472	0	20,472
1050522	07903	9,446	22,420	5,930	9,565	1,040	21,166	0	0	0	0	0	726	37,440	1,719	0	480	0	109,932	0	109,932
1050531	08801	4,815	10,920	0	6,798	240	6,110	0	0	0	0	0	447	9,496	839	0	300	0	39,965	0	39,965
1050602	08802	4,936	9,440	0	4,471	240	3,760	0	0	0	0	0	417	3,944	792	0	1,125	0	29,125	2,913	26,212
1050608	089	2,476	2,360	0	3,640	240	1,030	0	0	0	0	0	163	6,879	223	0	75	0	17,086	1,709	15,377
1050511	47501	17,737	92,820	11,700	26,268	1,840	36,426	0	0	1,320	0	0	1,597	31,222	2,728	1,031	1,425	0	226,114	0	226,114
1050602	07603	4,745	7,380	0	3,721	640	3,461	0	0	0	0	0	282	5,996	707	0	225	0	27,157	2,716	24,441
1050531	07903	5,182	10,620	0	7,183	640	6,430	0	0	0	0	0	371	9,983	927	0	330	0	41,666	4,167	37,499
1050529	182	6,362	13,280	0	7,205	440	904	0	0	0	0	0	296	33,649	1,103	0	225	0	63,464	0	63,464
1050606	090	3,008	4,720	0	7,565	440	880	0	0	0	0	0	138	6,116	487	0	150	0	23,504	2,350	21,154
1050606	277	2,485	2,865	0	1,770	560	7,290	0	0	0	0	0	208	4,186	440	0	150	0	19,954	1,995	17,959
1050611	089	2,005	1,180	0	3,225	240	910	0	0	0	0	0	97	130	88	0	75	0	7,950	0	7,950
1050610	YYY	706	1,180	0	770	1,231	60	0	0	0	0	0	92	58,732	395	0	150	0	63,316	0	63,316
1050608	08802	2,818	2,360	0	2,291	240	1,460	0	0	0	0	0	185	3,532	311	0	180	0	13,377	1,338	12,039
1050606	08801	2,815	2,592	0	8,275	440	2,920	0	0	0	0	0	194	2,036	487	0	75	0	19,834	1,983	17,851
1050610	47501	1,389	1,180	0	5,768	2,020	5,283	0	0	0	0	0	2,193	1,999	135	0	225	0	20,192	0	20,192
1050525	YYY	8,519	9,195	0	10,168	41,529	10,448	15,409	0	0	0	2,550	2,939	14,517	1,806	0	300	0	117,380	0	117,380
1050610	YYY	1,073	573	0	1,045	1,231	465	0	0	0	0	0	92	59,377	483	0	150	0	64,489	0	64,489
1050603	089	4,975	6,500	0	6,711	680	1,478	0	0	0	0	0	314	4,914	663	0	225	0	26,460	0	26,460
1050531	08701	8,425	33,860	1,560	11,993	1,040	9,558	0	320	0	0	0	355	23,336	1,056	0	630	0	92,133	9,213	82,920
1050606	089	3,509	2,592	0	4,237	440	1,950	0	0	0	0	0	239	11,275	487	0	150	0	24,879	2,488	22,391
1050518	41501	11,127	25,380	0	11,485	50,759	9,806	0	4,320	0	0	0	1,059	18,323	2,071	0	525	0	134,855	0	134,855
1050605	12701	3,205	7,080	1,950	12,548	600	2,382	0	0	0	0	0	20	585	616	0	0	0	28,986	2,899	26,087
1050602	07903	6,185	10,620	2,580	9,303	5,440	12,858	0	0	1,320	0	0	523	5,707	880	0	330	0	55,746	5,575	50,171
1050606	08802	2,815	5,020	0	3,481	440	1,200	0	0	0	0	0	92	6,037	487	0	150	0	19,722	1,972	17,750
1050602	089	5,962	11,800	3,060	9,571	19,385	2,815	0	0	0	0	0	456	5,441	927	0	330	0	59,747	5,975	53,772
1050420	07904	5,654	11,349	1,560	1,045	800	9,403	0	3,760	0	0	0	88	3,760	1,276	0	0	0	38,695	0	38,695
1050608	089	4,053	2,592	0	3,744	200	2,668	0	0	0	0	0	272	12,700	487	0	600	0	27,316	0	27,316
1050610	47501	5,601	19,200	0	19,094	2,080	9,096	2,081	0	2,370	2,640	0	20,068	21,167	352	0	480	0	104,229	10,423	93,806
1050610	08802	1,779	3,540	0	2,952	200	900	0	0	0	0	0	29	193	352	0	75	0	10,020	1,002	9,018
1050608	090	3,463	5,900	0	5,011	440	1,820	0	0	0	0	0	186	2,127	487	0	150	0	19,584	0	19,584
1050607	YYY	3,535	6,200	0	6,615	480	870	0	0	0	0	0	230	1,587	575	0	150	0	20,242	0	20,242
1050601	07903	5,653	13,280	3,900	7,491	880	16,228	0	0	0	0	0	739	6,022	1,103	0	300	0	55,596	5,560	50,036
1050607	07903	3,535	6,200	1,510	3,899	240	3,780	0	0	0	0	0	407	6,704	575	0	150	0	27,000	2,700	24,300
1050607	089	4,244	6,200	0	5,576	7,642	780	0	0	0	0	0	203	8,448	575	0	255	0	33,923	3,392	30,531
1050607	089	3,728	6,200	0	11,667	7,402	520	0	0	0	0	0	252	5,029	575	0	180	0	35,553	3,555	31,998
1050610	09102	2,288	3,840	0	2,298	440	210	0	0	0	0	0	156	931	311	0	150	0	10,624	1,062	9,562
1050612	331	2,613	2,360	0	9,362	240	1,260	0	0	0	0	0	44	121	176	0	0	0	16,176	0	16,176
1050608	08801	4,255	7,080	0	4,480	240	3,050	0	0	0	0	0	237	5,351	616	0	225	0	25,534	2,553	22,981
1050610	07903	2,852	5,900	1,950	1,730	600	5,971	0	0	0	0	0	205	1,586	528	0	150	0	21,472	0	21,472
1050603	07903	6,622	12,980	4,290	15,980	640	14,054	0	0	0	0	0	4,069	7,023	1,103	0	525	0	67,286	6,729	60,557
1050530	YYY	7,799	18,000	0	1,850	600	15,061	0	0	0	0	0	2,575	4,594	1,367	0	450	0	52,296	0	52,296
1050607	07903	4,568	8,260	2,630	4,741	440	7,239	0	0	0	0	0	515	10,772	751	0	180	0	40,096	4,010	36,086
1050615	07903	1,907	1,180	0	3,749	240	867	0	0	0	0	0	155	1,168	88	0	75	0	9,429	0	9,429
1050525	YYY	9,601	24,780	0	22,598	69,078	1,524	0	0	0	0	0	562	11,884	1,936	0	480	0	142,443	0	142,443
1050612	089	3,124	1,719	0	4,108	440	90	0	0	0	0	0	197	3,171	311	0	180	0	13,340	1,334	12,006
1050609	08802	3,463	2,592	0	9,459	7,442	1,120	0	0	0	0	0	242	7,613	531	0	225	0	32,687	3,269	29,418
1050604	090	6,376	5,757	0	6,999	680	6,220	0	0	0	0	0	445	13,927	971	0	330	0	41,705	4,171	37,534
1050529	47501	11,604	62,184	5,890	21,205	1,480	27,025	0	2,160	0	0	0	4,384	31,114	1,584	1,031	1,080	0	170,741	0	170,741
1050612	089	2,980	2,660	0	3,279	240	1,560	0	0	0	4,100	0	151	3,988	311	0	150	0	19,419	0	19,419
1050608	090	5,112	8,260	1,950	2,788	640	2,775	0	0	0	0	0	420	4,074	663	0	225	0	26,907	0	26,907
1050610	08802	3,050	5,020	0	4,800	240	2,160	0	0	0	0	0	212	2,195	487	0	150	0	18,314	1,831	16,483
1050608	090	4,903	8,260	2,040	4,765	640	1,932	0	0	0	0	0	258	2,757	663	0	255	0	26,473	0	26,473
1050608	08802	4,378	8,260	0	4,620	440	3,510	0	0	0	0	0	186	10,323	663	0	225	0	32,605	3,261	29,344
1050611	YYY	6,519	32,000	1,020	17,097	8,642	14,545	2,081	0	8,310	1,320	0	10,716	20,402	528	0	930	0	124,110	0	124,110
1050612	089	4,596	5,900	1,950	10,511	440	6,920	0	0	0	0	0	373	1,467	528	0	180	0	32,865	3,287	29,578
1050611	08801	4,611	5,900	0	11,431	440	4,130	0	0	2,640	0	0	567	2,525	575	0	150	0	32,969	0	32,969
1050612	09701	3,110	5,020	0	2,561	240	910	0	0	0	0	0	132	7,024	487	0	150	0	19,634	1,963	17,671
1050531	07903	8,112	9,168	5,850	9,832	640	17,241	0	0	0	0	0	517	21,369	1,543	0	375	0	74,647	7,465	67,182
1050610	090	4,081	7,080	0	5,236	640	240	0	0	0	0	0	143	8,571	663	0	255	0	26,909	2,691	24,218
1050612	08802	3,830	5,900	0	4,618	440	810	0	0	0	0	0	241	7,187	528	0	180	0	23,734	2,373	21,361
1050611	08802	4,255	7,080	0	5,260	440	3,650	0	0	0	0	0	262	6,050	616	0	225	0	27,838	2,784	25,054
1050607	YYY	3,883	11,800	0	1,515	4,730	630	0	0	0	0	0	247	29,772	2,196	0	825	0	55,598	0	55,598
1050611	08801	4,081	7,080	0	4,373	440	1,540	0	0	0	0	0	256	4,757	616	0	255	0	23,398	2,340	21,058
1050606	07903	5,860	12,100	3,510	4,716	640	8,810	0	0	0	0	0	414	4,325	971	0	300	0	41,646	0	41,646
1050611	08801	4,241	8,260	0	5,365	440	2,540	0	0	0	0	0	333	4,312	616	0	150	0	26,257	2,626	23,631
1050611	08802	3,558	8,260	0	6,781	200	1,770	0	0	0	0	0	276	2,459	704	0	150	0	24,158	2,416	21,742
1050612	YYY	2,838	7,080	0	14,566	10,355	2,090	0	0	0	0	0	1,676	322	718	0	150	0	39,795	0	39,795
1050615	090	2,390	3,540	0	2,076	440	240	0	0	0	0	0	224	3,106	311	0	180	0	12,507	1,251	11,256
1050617	47501	2,709	6,400	0	6,750	720	5,429	0	0	1,320	1,320	0	9,401	2,822	176	0	405	0	37,452	0	37,452
1050606	07903	6,255	6,603	4,240	10,451	640	14,336	0	0	0	0	0	506	20,813	1,103	0	630	0	65,577	6,558	59,019
1050612	08002	3,983	5,900	0	3,702	840	870	0	0	0	0	0	259	2,792	531	0	255	0	19,132	1,913	17,219
1050606	08003	5,639	7,176	4,290	4,380	1,080	14,850	0	0	0	0	0	431	13,536	1,191	0	300	0	52,873	5,287	47,586
1050520	07903	12,976	33,340	10,530	8,774	840	31,129	0	0	0	0	0	1,365	21,702	2,643	0	675	0	123,974	12,534	111,440
1050617	YYY	1,059	2,360	0	810	4,239	60	0	0	0	0	0	93	13,913	1,185	0	300	0	24,019	0	24,019
1050617	YYY	1,059	2,360	0	0	3,499	30	0	0	0	0	0	32	14,545	1,185	0	450	0	23,160	0	23,160
1050525	47501	18,647	106,040	11,450	21,359	13,340	44,160	0	2,080	0	0	0	7,689	51,689	2,203	0	1,380	0	280,037	0	280,037
1050615	08802	2,499	4,720	0	2,684	400	300	0	0	0	0	0	131	3,058	440	0	150	0	14,382	1,438	12,944
1050610	090	4,675	9,740	0	9,021	1,120	5,530	0	0	0	0	0	362	11,592	839	0	300	0	43,179	4,318	38,861
1050611	090	4,067	4,011	0	3,384	640	900	0	0	0	0	0	345	2,905	663	0	225	0	17,140	1,714	15,426
1050609	08801	6,086	12,100	0	9,367	680	6,235	0	320	0	0	0	472	9,570	1,015	0	300	0	46,145	4,615	41,530
1050618	YYY	1,059	2,360	0	770	3,699	150	0	0	0	0	0	99	12,053	1,185	0	450	0	21,825	0	21,825
1050520	41501	13,461	17,217	10,920	24,264	1,840	31,437	0	0	2,385	0	0	4,044	38,483	2,687	0	855	0	147,593	0	147,593
1050603	YYY	2,838	5,900	0	15,802	10,355	1,600	0	0	0	0	0	1,656	481	630	0	75	0	39,337	0	39,337
1050604	47501	13,256	68,440	3,060	25,291	2,120	28,141	0	0	10,600	0	0	9,199	53,681	1,367	0	1,605	0	216,760	21,676	195,084
1050618	YYY	1,059	2,360	0	770	3,902	880	0	0	0	0	0	99	22,839	1,185	0	300	0	33,394	0	33,394
1050614	090	3,728	6,200	0	3,709	440	450	0	0	0	0	0	286	5,816	575	0	150	0	21,354	2,135	19,219
1050616	08802	3,876	4,720	0	5,043	440	3,070	0	0	0	0	0	227	3,853	440	0	150	0	21,819	2,182	19,637
1050518	089	14,304	18,363	0	8,170	1,240	18,308	0	0	5,280	0	0	2,091	16,919	2,860	0	900	0	88,435	0	88,435
1050618	YYY	1,059	1,146	0	1,060	3,902	307	0	0	0	0	0	97	4,541	1,185	0	450	0	13,747	0	13,747
1050617	08802	2,829	1,746	0	3,091	240	3,030	0	0	0	0	0	70	7,318	355	0	150	0	18,829	1,883	16,946
1050606	07903	10,196	43,800	5,260	19,629	1,040	16,219	0	320	0	0	0	4,672	24,413	1,408	0	855	0	127,812	0	127,812
1050618	089	2,880	1,719	0	5,935	0	1,630	0	0	0	0	0	78	1,733	264	0	105	0	14,344	1,434	12,910
1050507		706	1,146	2,020	1,375	200	2,977	0	320	0	0	0	224	3,069	176	0	75	0	12,288	0	8,698
1050619	YYY	1,059	1,146	0	770	3,902	210	0	0	0	0	0	99	23,427	1,185	0	450	0	32,248	0	32,248
1050619	YYY	1,059	2,360	0	2,539	10,369	2,670	0	0	0	0	0	1,950	70,222	1,185	0	450	0	92,804	0	92,804
1050620	YYY	706	1,180	0	570	1,434	60	0	0	0	0	0	93	14,860	790	0	225	0	19,918	0	19,918
1050603	07904	8,505	10,041	6,190	11,230	6,835	17,222	0	0	0	0	0	932	27,809	1,631	0	480	0	90,875	0	90,875
1050620	28302	706	1,180	0	770	200	90	0	0	0	0	0	0	788	176	0	0	0	3,910	0	3,910
1050610	YYY	1,412	1,146	0	1,540	4,930	450	0	0	0	0	0	223	27,431	1,580	0	450	0	39,162	0	39,162
1050615	47501	5,870	27,926	1,360	12,577	16,100	13,224	0	960	0	0	0	3,323	10,341	663	0	825	0	93,169	9,317	83,852
1050617	090	3,375	3,233	0	2,483	920	600	0	0	0	0	0	155	6,992	443	0	150	0	18,351	1,835	16,516
1050614	08001	3,724	28,576	2,730	2,162	200	5,141	0	0	0	0	0	379	3,890	792	0	255	0	47,849	4,785	43,064
1050620	YYY	1,059	2,360	0	770	3,902	120	0	0	0	0	0	99	27,491	1,185	0	450	0	37,436	0	37,436
1050615	08801	5,394	8,260	0	4,459	440	4,470	0	2,640	0	0	0	362	8,715	704	0	255	0	35,699	3,570	32,129
1050616	47701	4,039	6,200	0	11,424	640	3,905	12,121	0	0	0	6,075	2,626	5,584	531	0	210	0	53,355	0	53,355
1050610	07903	6,975	9,911	4,290	12,621	840	17,428	0	0	0	0	0	2,350	22,610	1,144	0	405	0	78,574	7,857	70,717
1050613	47501	9,851	64,000	1,950	21,476	1,080	12,786	2,489	0	21,885	10,700	0	14,601	16,497	927	0	1,650	0	179,892	0	179,892
1050619	089	3,549	3,840	0	7,832	980	3,757	0	0	0	0	0	304	11,717	399	0	180	0	32,558	3,256	29,302
1050610		7,695	16,820	3,700	14,964	7,842	14,609	0	0	2,640	0	0	726	28,994	1,279	0	405	0	99,674	0	99,674
1050617	089	5,316	3,438	390	5,398	6,395	9,237	0	0	0	0	0	405	11,755	663	0	705	0	43,702	0	43,702
1050615	08802	4,773	10,620	0	3,724	440	350	0	0	0	0	0	478	7,390	839	0	330	0	28,944	2,894	26,050
1050619	08802	3,549	5,020	0	2,571	240	2,360	0	0	0	0	0	206	4,826	443	0	150	0	19,365	1,937	17,428
1050530	07903	11,682	14,898	10,090	12,920	1,640	27,713	0	0	0	0	0	3,097	43,538	2,335	0	705	0	128,618	0	128,618
1050603	YYY	2,118	3,540	0	1,890	7,395	210	0	0	0	0	0	141	22,973	2,370	0	750	0	41,387	0	41,387
1050607	47501	13,407	87,920	5,460	14,332	1,480	33,840	0	1,200	0	0	0	1,343	22,484	1,631	0	2,055	0	185,152	18,515	166,637
1050622	090	2,599	1,719	0	4,085	680	120	0	0	0	0	0	155	4,111	352	0	150	0	13,971	1,397	12,574
1050614	YYY	4,759	12,100	0	13,012	11,402	7,197	0	0	0	0	0	3,717	983	1,015	0	75	0	54,260	5,426	48,834
1050618	08801	3,888	7,380	0	9,526	8,542	3,840	0	0	0	0	0	574	8,018	663	0	825	0	43,256	4,326	38,930
1050613	07901	6,229	13,280	0	13,936	6,595	8,837	0	0	0	0	0	2,257	3,957	1,103	0	375	0	56,569	0	56,569
1050624	YYY	1,059	1,146	0	770	3,699	210	0	0	0	0	0	26	9,518	1,185	0	450	0	18,063	0	18,063
1050603	07903	9,771	12,060	7,800	5,759	840	25,386	0	0	0	0	0	1,608	10,146	1,983	0	375	0	75,728	0	75,728
1050624	YYY	1,059	2,360	0	770	3,902	962	0	0	0	0	0	32	27,627	1,185	0	450	0	38,347	0	38,347
1050623	17603	1,879	2,660	0	2,160	6,282	3,102	0	0	1,320	0	0	1,014	8,037	267	0	150	0	26,871	0	26,871
1050621	089	3,728	5,900	0	3,847	440	340	0	0	0	0	0	287	2,591	528	0	255	0	17,916	1,792	16,124
1050625	YYY	706	1,180	0	770	6,986	30	0	0	0	0	0	38	66,540	395	0	150	0	76,795	0	76,795
1050624	YYY	1,426	2,360	0	2,413	9,654	60	0	0	0	0	0	63	62,265	1,185	0	450	0	79,876	0	79,876
1050621	YYY	2,852	5,900	0	1,090	31,702	3,754	0	0	1,320	0	6,075	8,218	15,255	1,449	0	525	0	78,140	0	78,140
1050622	090	3,008	2,292	0	3,706	680	270	0	0	0	0	0	183	7,406	440	0	150	0	18,135	1,814	16,321
1050617	089	5,521	8,860	0	8,547	7,362	150	0	0	0	0	0	221	12,043	795	0	300	0	43,799	4,380	39,419
1050624	YYY	1,059	1,146	0	3,872	9,654	150	0	0	0	0	0	114	62,286	1,375	0	450	0	80,106	0	80,106
1050617	07903	5,641	9,740	0	7,905	640	7,280	0	0	0	0	0	645	6,214	883	0	1,230	0	40,178	0	40,178
1050619	YYY	3,544	5,798	0	14,175	15,910	4,990	0	0	0	0	0	1,894	5,700	894	0	1,005	0	53,910	5,391	48,519
1050625	YYY	1,059	2,360	0	700	3,699	90	0	0	0	0	0	107	13,566	1,185	0	450	0	23,216	0	23,216
1050624	089	1,935	2,660	0	3,386	440	90	0	0	0	0	0	168	991	267	0	450	0	10,387	1,039	9,348
1050622	07903	4,406	5,900	0	8,004	440	3,350	0	0	0	0	0	280	3,016	399	0	180	0	25,975	0	25,975
1050622	090	4,773	5,900	0	9,276	440	970	0	0	0	0	0	179	5,311	440	0	180	0	27,469	0	27,469
1050621	089	3,510	6,200	0	5,356	6,395	30	0	0	0	0	0	535	2,305	575	0	150	0	25,056	2,506	22,550
1050624	YYY	1,412	3,540	0	8,707	4,200	1,270	0	0	0	0	0	1,613	28	352	0	0	0	21,122	0	21,122
1050625	YYY	1,059	1,146	0	1,170	3,699	150	0	0	0	0	0	122	13,439	1,185	0	450	0	22,420	0	22,420
1050626	08701	1,762	6,400	0	4,634	480	1,506	0	0	17,940	0	0	2,249	7,031	135	0	225	0	42,362	0	42,362
1050530	47501	19,502	104,872	10,920	15,935	8,642	47,516	0	0	0	0	0	2,136	36,670	2,640	0	705	0	249,538	24,954	224,584
1050612	07903	7,759	8,322	0	5,296	840	9,720	0	0	0	0	0	668	9,205	1,367	0	375	0	43,552	4,355	39,197
1050624	09903	1,921	3,233	0	2,473	240	150	0	0	0	0	0	95	424	308	0	150	0	8,994	899	8,095
1050625	YYY	1,412	3,540	0	770	650	120	0	0	0	0	0	92	669	352	0	75	0	7,680	0	7,680
1050619	089	4,594	9,440	0	7,350	880	5,820	0	0	0	0	0	1,939	8,321	795	0	480	0	39,619	3,962	35,657
1050627	07901	706	1,180	0	1,100	200	0	0	0	0	0	0	29	105	88	0	75	0	3,483	0	3,483
1050621	08802	4,597	7,380	0	5,972	640	6,280	0	0	0	0	0	401	14,985	663	0	405	0	41,323	4,132	37,191
1050619	07903	4,594	4,884	0	4,461	640	6,330	0	0	0	0	0	469	10,622	795	0	330	0	33,125	0	33,125
1050625	YYY	1,412	3,540	0	12,276	5,955	520	0	0	0	0	0	209	239	264	0	75	0	24,490	2,449	22,041
1050605	YYY	2,485	1,719	0	2,710	7,395	150	0	0	0	0	0	428	31,660	2,370	0	900	0	49,817	0	49,817
1050627	YYY	1,059	2,360	0	770	3,699	150	0	0	0	0	0	99	63,887	1,185	0	300	0	73,509	0	73,509
1050621	089	5,342	8,560	0	8,888	7,942	1,414	0	0	0	0	0	396	6,147	751	0	255	0	39,695	3,970	35,725
1050622	08801	4,378	8,260	0	3,474	440	3,160	0	0	0	0	0	310	3,755	704	0	225	0	24,706	2,471	22,235
1050623	47501	5,737	23,920	1,510	16,535	1,040	11,429	0	560	0	0	0	339	2,018	704	0	75	0	63,867	6,387	57,480
1050623	YYY	4,011	8,260	0	4,355	4,225	1,870	0	0	0	0	0	213	4,013	663	0	180	0	27,790	0	27,790
1050529	31501	1,779	3,540	0	1,090	200	201	9,954	0	0	0	0	125	1,409	352	0	75	0	18,725	1,873	16,852
1050529	31502	1,779	3,540	0	1,574	200	47	11,303	0	0	0	0	157	456	352	0	75	0	19,483	1,948	17,535
1050526	444	3,305	6,200	0	4,672	5,232	5,941	0	0	0	0	0	278	590	575	0	375	0	27,168	0	27,168
1050527	30001	2,274	5,020	0	5,839	11,740	1,580	0	0	0	0	0	243	1,467	399	0	450	0	29,012	2,901	26,111
1050528	05301	2,471	3,438	0	4,177	200	112	27,096	0	0	0	0	142	636	616	0	150	0	39,038	0	39,038
1050531	29701	1,742	2,360	0	3,430	4,800	90	0	0	0	0	0	50	238	311	0	75	0	13,096	0	13,096
1050530	31603	1,921	2,960	0	4,607	480	0	0	0	0	0	0	169	401	267	0	75	0	10,880	1,088	9,792
1050525	41501	6,048	10,620	0	12,841	6,395	1,260	14,166	0	0	0	6,075	2,879	4,814	880	0	300	0	66,278	6,628	59,650
1050529	31604	2,448	5,020	0	6,859	240	0	0	0	0	0	0	120	384	487	0	150	0	15,708	1,571	14,137
1050529	320	2,274	2,960	0	5,843	480	0	0	0	0	0	0	219	1,953	399	0	150	0	14,278	1,428	12,850
1050529	32201	2,641	4,140	0	3,541	240	30	0	0	0	0	0	232	1,032	443	0	150	0	12,449	1,245	11,204
1050526	068	3,644	6,800	0	2,905	240	360	0	0	0	12,300	0	205	1,159	663	0	225	0	28,501	0	28,501
1050515	46801	12,318	57,503	2,340	21,950	1,000	18,537	12,443	0	10,020	41,000	0	4,353	10,555	1,760	0	1,050	0	194,829	19,483	175,346
1050527	47803	4,950	5,920	0	6,409	13,200	2,624	0	0	0	20,500	0	16,956	2,942	619	0	300	0	74,420	0	74,420
1050529	31603	2,801	4,140	0	5,668	240	60	0	0	0	0	0	259	521	487	0	225	0	14,401	1,440	12,961
1050602	45002	2,451	2,360	0	2,643	0	440	0	0	0	0	0	153	754	264	1,031	75	0	10,171	1,017	9,154
1050526	320	4,731	6,800	0	4,620	7,202	210	0	0	0	16,400	0	354	1,623	707	0	225	0	42,872	4,287	38,585
1050525	29901	5,667	11,800	0	9,559	4,880	5,210	0	0	0	0	0	347	1,421	968	1,031	600	0	41,483	4,148	37,335
1050517	44901	12,653	85,060	3,070	11,959	840	26,744	0	0	0	0	0	937	5,230	1,760	1,031	1,080	0	150,364	15,036	135,328
1050531	WWW	2,448	2,592	0	3,031	240	0	0	0	0	8,200	0	107	296	399	0	0	0	17,313	0	17,313
1050527	320	3,860	9,740	0	3,962	480	1,163	0	0	0	0	0	282	3,084	839	0	675	0	24,085	2,409	21,676
1050602	320	2,232	3,540	0	2,256	480	30	0	0	0	0	0	136	396	311	0	225	0	9,606	0	9,606
1050530	41601	3,521	6,500	0	8,835	480	94	0	0	0	0	0	266	2,547	619	0	225	0	23,087	2,309	20,778
1050525	41601	6,715	14,160	0	10,570	640	210	0	0	0	0	0	291	9,280	1,144	0	375	0	43,385	4,339	39,046
1050516	07903	9,197	23,020	7,020	16,307	680	7,243	0	0	7,920	0	0	819	8,564	1,851	0	1,455	0	84,076	8,408	75,668
1050603	31603	2,095	3,540	0	9,486	240	1,394	0	0	1,320	0	0	397	1,424	311	0	375	0	20,582	2,058	18,524
1050531	320	3,510	5,900	0	2,693	7,202	1,498	0	0	0	0	0	252	3,958	575	0	225	0	25,813	2,581	23,232
1050602	320	2,952	2,319	0	4,603	240	77	0	0	0	0	0	251	842	443	0	150	0	11,877	1,188	10,689
1050603	320	2,641	5,020	0	4,750	4,800	0	0	0	0	0	0	231	1,098	487	1,031	150	0	20,208	2,021	18,187
1050604	31502	2,132	2,292	0	960	200	141	9,954	0	0	0	0	139	170	264	0	75	0	16,327	1,633	14,694
1050405		9,302	30,344	6,240	8,192	600	16,243	0	0	0	16,400	0	659	5,121	1,144	0	675	0	94,920	0	94,920
1050518	31601	9,023	13,581	2,730	11,664	640	15,414	4,162	0	2,640	24,600	0	4,111	9,636	1,895	0	780	0	100,876	10,088	90,788
1050605	320	2,344	2,660	0	6,429	240	889	0	0	2,115	0	0	249	2,685	311	0	330	0	18,252	1,825	16,427
1050524	41601	7,079	13,000	3,210	8,222	240	24,116	0	0	0	0	0	598	18,676	1,191	0	450	0	76,782	7,678	69,104
1050512	31603	13,174	33,040	6,580	16,579	2,240	29,806	0	3,120	2,640	0	0	4,622	13,774	2,511	1,031	930	0	130,047	13,005	117,042
1050608	12701	2,711	2,360	0	8,683	680	2,952	0	0	0	0	0	2,587	943	264	0	375	0	21,555	2,156	19,399
1050603	41501	4,434	8,260	0	4,824	16,642	702	14,166	0	0	0	2,550	6,214	2,697	663	0	225	0	61,377	6,138	55,239
1050530	41601	6,020	12,980	0	9,837	480	345	0	0	0	0	0	313	12,730	1,056	0	300	0	44,061	5,463	38,598
1050604	31603	2,627	6,200	0	4,975	240	0	0	0	0	0	0	69	643	575	0	0	0	15,329	1,533	13,796
1050530	321	5,667	11,220	0	4,091	7,202	0	0	0	0	0	0	443	4,616	971	0	300	0	34,510	3,451	31,059
1050605	320	3,182	5,020	0	4,510	240	94	0	0	0	0	0	253	1,346	487	0	150	0	15,282	1,528	13,754
1050607	321	2,462	3,840	0	2,373	7,202	204	0	0	0	0	0	185	5,618	399	0	150	0	22,433	2,243	20,190
1050603	320	3,700	5,920	0	5,479	720	360	0	0	0	4,100	0	470	2,716	619	0	375	0	24,459	0	24,459
1050606	41601	2,815	2,019	0	3,839	480	330	0	0	0	0	0	250	1,451	443	0	150	0	11,777	0	11,777
1050520	31501	10,718	25,960	0	22,363	7,355	7,197	15,868	0	0	47,170	6,075	12,267	8,092	2,024	0	525	0	165,614	0	165,614
1050602	31501	5,790	6,303	0	4,888	240	419	16,028	320	0	24,600	0	20,012	1,939	1,056	0	150	0	81,745	8,175	73,570
1050531	31501	5,309	15,340	0	2,630	400	7,581	12,035	0	1,320	20,500	0	2,719	482	1,144	0	150	0	69,610	0	69,610
1050604	320	4,594	9,740	0	3,264	440	4,314	0	0	0	0	0	443	9,514	798	0	330	0	33,437	0	33,437
1050605	320	4,583	7,380	0	5,381	7,442	3,630	0	0	0	0	0	339	8,184	660	0	150	0	37,749	3,775	33,974
1050606	41601	3,714	7,380	0	8,495	240	154	0	0	1,320	0	0	255	3,906	663	0	225	0	26,352	2,635	23,717
1050608	41601	2,627	5,900	0	3,616	480	150	0	0	0	0	0	294	1,138	528	0	150	0	14,883	1,488	13,395
1050527	31601	8,138	17,659	0	12,757	12,840	11,747	0	0	0	36,900	0	308	8,408	1,499	0	225	0	110,481	0	110,481
1050609	321	2,952	5,020	0	3,466	240	180	0	0	0	0	0	251	678	399	0	150	0	13,336	0	13,336
1050526	07903	9,644	19,780	6,240	11,934	5,600	22,430	0	0	0	0	0	1,198	30,295	1,543	0	825	0	109,489	0	109,489
1050610	320	3,182	5,020	0	3,414	240	214	0	0	0	0	0	250	1,333	487	0	150	0	14,290	1,429	12,861
1050610	320	3,182	5,020	0	3,696	7,442	810	0	0	0	0	0	197	3,453	443	0	150	0	24,393	2,439	21,954
1050612	321	2,543	3,540	0	3,520	480	30	0	0	0	0	0	137	1,479	352	0	150	0	12,231	1,223	11,008
1050609	320	3,672	5,900	0	4,681	480	120	0	0	0	0	0	317	2,707	575	0	150	0	18,602	1,860	16,742
1050607	31604	3,874	8,260	0	6,296	11,540	360	0	0	0	0	0	105	462	704	0	75	0	31,676	3,168	28,508
1050610	321	3,157	5,020	0	5,493	240	844	0	0	0	0	0	291	1,848	399	0	180	0	17,472	1,747	15,725
1050528	41501	13,533	85,060	5,020	31,536	25,132	32,133	14,166	0	6,220	0	2,550	13,542	36,497	1,672	0	1,755	0	268,816	0	0
1050531	31501	6,345	15,640	0	48,047	240	2,275	9,954	0	2,640	24,600	0	1,641	1,002	1,232	0	375	0	113,991	11,399	102,592
1050607	320	4,067	8,560	0	2,882	7,202	300	0	0	0	0	0	461	10,433	751	0	225	0	34,881	3,488	31,393
1050611	321	2,288	3,840	0	3,401	240	40	0	0	0	0	0	225	3,462	399	0	150	0	14,045	1,405	12,640
1050614	30102	1,568	2,360	0	1,911	240	0	0	0	0	0	0	47	127	264	0	75	0	6,592	659	5,933
1050612	31603	2,023	2,960	0	4,330	240	180	0	0	0	0	0	62	140	223	0	75	0	10,233	1,023	9,210
1050610	320	3,535	5,900	0	5,262	240	797	0	0	0	8,200	0	273	5,507	531	0	180	0	30,425	3,043	27,382
1050608	31501	4,568	8,260	0	6,089	1,080	2,874	12,443	0	0	16,400	0	2,886	489	751	0	75	0	55,915	0	55,915
1050610	31601	3,389	3,738	0	3,491	240	520	0	0	0	16,400	0	183	1,319	663	0	375	0	30,318	0	30,318
1050611	320	4,230	7,080	1,950	5,319	240	3,781	0	0	0	12,300	0	320	5,901	616	1,031	225	0	42,993	0	42,993
1050530	31601	7,964	9,768	0	8,515	1,885	1,699	2,489	0	0	32,800	0	1,888	1,675	1,543	0	300	0	70,526	0	70,526
1050608	321	4,155	8,560	0	7,925	7,442	620	0	0	0	0	0	314	3,431	795	0	225	0	33,467	3,347	30,120
1050606	305	6,376	10,920	0	5,936	20,842	3,532	0	0	0	0	0	2,301	8,594	971	0	255	0	59,727	5,973	53,754
1050609	47701	4,522	9,440	0	11,290	440	213	8,726	0	1,320	0	6,075	3,512	901	751	0	150	0	47,340	4,734	42,606
1050616	31601	2,098	1,180	0	3,957	480	800	0	0	1,320	4,100	0	173	477	223	0	0	0	14,808	0	14,808
1050608	089	5,762	4,611	0	7,916	480	3,520	0	0	0	0	0	413	10,387	839	0	450	0	34,378	3,438	30,940
1050615	320	2,543	3,540	0	3,125	240	60	0	0	0	0	0	201	1,588	352	0	150	0	11,799	1,180	10,619
1050612	321	3,816	7,080	0	3,361	240	948	0	0	0	0	0	334	1,107	616	0	225	0	17,727	1,773	15,954
1050607	31601	6,009	5,730	0	7,252	1,440	3,679	2,489	0	0	12,300	0	6,957	18,582	1,015	0	300	0	65,753	0	65,753
1050612	41601	3,449	7,080	0	3,293	240	90	0	0	0	0	0	218	5,510	616	0	225	0	20,721	0	20,721
1050612	331	3,249	2,592	0	2,776	240	90	0	0	1,320	0	0	81	794	484	0	75	0	11,701	1,170	10,531
1050614	41601	3,524	4,720	0	8,036	4,800	930	0	0	0	0	0	391	1,144	487	0	150	0	24,182	2,418	21,764
1050615	41601	3,171	3,540	0	4,617	240	136	0	0	0	4,100	0	227	682	399	0	75	0	17,187	0	17,187
1050615	41601	3,997	4,720	0	4,700	240	390	0	0	0	0	0	226	1,996	440	0	150	0	16,859	1,686	15,173
1050614	29601	2,801	3,165	0	11,319	480	450	0	0	1,320	0	0	155	885	575	0	75	0	21,225	2,123	19,102
1050617	42303	2,084	1,480	0	2,958	240	0	0	0	0	0	0	64	445	267	0	0	0	7,538	0	7,538
1050526	41501	12,403	39,060	1,560	25,241	920	10,525	2,489	0	13,265	55,370	6,075	8,539	21,250	2,247	0	900	0	199,844	0	199,844
1050616	41601	2,952	2,292	0	3,443	7,202	180	0	0	0	0	0	185	3,206	399	0	150	0	20,009	2,001	18,008
1050611		10,250	59,960	1,560	18,877	5,680	12,283	0	0	0	20,500	0	2,534	10,735	968	0	480	0	143,827	0	143,827
1050617	31502	2,132	4,720	0	1,100	200	210	9,954	0	0	0	0	164	62	440	0	75	0	19,057	1,906	17,151
1050618	321	1,935	2,660	0	3,091	480	30	0	0	0	0	0	203	587	267	0	75	0	9,328	933	8,395
1050612	41501	6,175	22,972	0	12,473	4,880	7,934	14,166	0	1,320	0	5,955	4,686	15,717	795	0	1,380	0	98,453	9,845	88,608
1050605	47802	7,065	16,820	5,070	12,983	240	10,902	15,849	0	0	28,700	0	5,855	5,745	1,367	0	375	0	110,971	0	110,971
1050608	320	6,301	6,603	0	7,357	680	2,730	0	0	0	0	0	378	3,484	1,147	0	525	0	29,205	2,921	26,284
1050528	41601	15,651	90,960	5,020	33,131	25,132	37,469	14,166	2,040	6,220	0	2,550	13,841	41,568	2,200	0	1,905	0	291,853	2,304	289,549
1050616	31603	3,877	5,900	0	4,653	440	540	0	0	0	0	0	297	838	575	0	300	0	17,420	0	17,420
1050618	320	2,288	3,840	0	3,161	240	0	0	0	0	0	0	222	644	355	0	150	0	10,900	1,090	9,810
1050614	31501	4,067	4,311	0	8,158	240	4,527	12,443	0	1,320	4,100	6,075	1,628	758	751	0	150	0	48,528	4,853	43,675
1050617	452	2,274	5,020	0	5,393	240	317	0	0	0	0	0	127	521	487	0	0	0	14,379	0	14,379
1050616	331	3,449	3,438	0	8,130	690	2,082	0	0	0	0	0	236	19,190	616	0	255	0	38,086	3,809	34,277
1050611	WWW	5,521	8,260	0	3,115	240	30	0	0	0	8,200	0	242	7,613	839	0	300	0	34,360	0	34,360
1050522	46801	12,553	34,520	0	24,111	1,352	9,186	23,333	6,400	25,310	36,900	0	8,912	45,489	2,731	1,031	705	0	232,533	0	232,533
1050510	47701	21,271	112,200	16,180	36,184	2,840	34,831	5,585	2,160	10,345	61,500	0	12,849	45,090	3,977	0	1,335	0	366,347	0	366,347
1050622	29601	1,317	1,180	0	3,878	240	0	0	0	0	0	0	54	235	135	1,031	225	0	8,295	0	8,295
1050619	321	3,182	5,020	0	3,971	240	1,249	0	0	2,640	0	0	365	631	487	0	150	0	17,935	0	17,935
1050606	320	6,882	13,580	0	10,954	7,922	150	0	0	0	0	0	675	4,674	1,238	0	375	0	46,450	4,645	41,805
1050619	331	2,529	4,720	0	3,045	240	240	0	0	0	0	0	122	234	440	0	300	0	11,870	0	11,870
1050624	332	353	573	0	4,620	200	0	0	0	0	0	0	0	201	88	0	0	0	6,035	604	5,431
1050619	31601	3,510	5,900	0	5,660	240	2,010	0	0	0	12,300	0	195	661	575	0	75	0	31,126	3,113	28,013
1050620	31603	4,269	5,900	0	8,097	240	250	0	0	1,320	0	0	252	10,858	528	0	150	0	31,864	3,186	28,678
1050620	320	3,182	4,720	0	9,784	400	1,980	0	0	0	0	0	262	986	443	0	150	0	21,907	2,191	19,716
1050621	320	2,462	3,540	0	2,483	7,202	30	0	0	0	0	0	230	819	399	0	150	0	17,315	1,732	15,583
1050616	31501	4,508	10,620	0	8,150	240	899	0	0	0	6,170	6,075	5,046	5,896	880	0	150	0	48,634	4,863	43,771
1050526	31601	17,742	106,420	10,530	16,551	1,480	27,820	2,081	2,480	0	32,800	0	3,488	8,883	2,643	0	825	0	233,743	23,602	210,141
1050622	321	2,462	3,540	0	3,215	480	180	0	0	0	0	0	181	927	311	0	150	0	11,446	1,145	10,301
1050604	31601	10,273	23,600	7,800	17,772	640	15,813	2,081	0	2,640	24,600	0	2,557	5,008	1,895	0	600	0	115,279	0	115,279
1050621	41601	2,641	4,720	0	4,324	480	90	0	0	0	0	0	275	479	399	0	150	0	13,558	1,356	12,202
1050621	331	2,815	4,720	0	7,572	240	1,250	0	0	0	0	0	307	612	399	0	225	0	18,140	1,814	16,326
1050621	07903	3,361	5,900	0	3,720	480	0	0	0	0	0	0	235	4,643	528	0	630	0	19,497	1,950	17,547
1050621	31603	3,182	2,292	0	5,834	240	300	0	0	0	0	0	326	1,568	487	0	150	0	14,379	0	14,379
1050613	31502	6,006	13,280	0	6,100	240	1,253	18,129	0	2,270	28,700	0	6,537	2,698	1,100	0	150	0	86,463	8,646	77,817
1050620	29601	2,801	6,200	0	8,549	480	550	0	0	0	0	0	368	1,336	575	0	300	0	21,159	2,116	19,043
1050623	321	2,037	2,360	0	2,831	240	0	0	0	0	0	0	173	312	311	0	75	0	8,339	834	7,505
1050623	29601	2,451	2,660	0	6,481	5,040	460	0	0	0	0	0	98	977	311	1,031	300	0	19,809	1,981	17,828
1050623	31603	1,670	1,446	0	2,542	480	180	0	0	0	0	0	1,007	269	311	0	150	0	8,055	806	7,249
1050621	320	3,969	3,438	0	4,460	240	4,095	0	0	1,320	0	0	256	2,429	575	0	150	0	20,932	2,093	18,839
1050526	31501	13,584	34,820	5,850	19,377	1,040	14,164	2,081	0	2,910	51,270	6,075	8,036	42,174	2,775	0	675	0	204,831	0	204,831
1050609	170	8,175	21,240	0	35,393	11,900	5,902	8,750	0	2,990	16,400	6,075	10,153	846	1,862	0	225	0	129,911	12,991	116,920
1050617	320	4,773	6,671	0	5,489	480	480	0	0	0	0	0	424	12,661	883	0	330	0	32,191	0	32,191
1050621	331	4,622	7,080	0	7,607	240	420	0	0	0	12,300	0	277	1,701	616	0	150	0	35,013	0	35,013
1050623	321	2,952	4,720	0	4,124	240	0	0	0	0	0	0	212	1,079	440	0	75	0	13,842	0	13,842
1050604	41501	10,245	25,380	0	19,194	1,980	3,313	2,489	0	0	51,270	6,075	10,936	7,467	1,983	0	525	0	140,857	0	140,857
1050622	31603	3,902	2,865	0	7,674	240	2,490	0	0	0	0	0	379	1,241	528	0	225	0	19,544	1,954	17,590
1050611	320	8,138	20,060	5,800	13,476	640	3,500	0	0	2,640	0	0	1,398	23,645	1,543	0	480	0	81,320	0	81,320
1050617	31601	4,566	10,340	0	12,849	440	6,994	2,489	0	0	24,600	0	7,494	2,020	1,026	0	75	0	72,893	7,289	65,604
1050625	29601	1,742	873	0	3,226	240	30	0	0	0	0	0	80	231	267	0	375	0	7,064	706	6,358
1050621	08801	4,448	7,080	0	5,010	240	1,735	0	0	0	0	0	281	12,085	663	0	225	0	31,767	3,177	28,590
1050624	089	2,829	2,660	0	12,939	240	77	0	0	0	0	0	288	2,523	311	0	150	0	22,017	0	22,017
1050622		3,521	8,260	0	3,081	240	1,650	0	0	0	0	0	317	1,556	487	0	75	0	19,187	0	19,187
1050624	321	3,375	5,020	0	4,135	480	220	0	640	0	0	0	253	6,647	487	0	150	0	21,407	2,141	19,266
1050623	320	4,025	7,080	0	2,466	240	720	0	320	0	0	0	357	1,797	616	0	225	0	17,846	1,785	16,061
1050617	271	6,199	14,160	4,240	3,766	240	5,643	0	0	0	0	0	47	367	1,103	0	75	0	35,840	3,584	32,256
1050620	320	4,787	9,440	0	3,894	240	630	0	0	0	0	0	503	2,066	839	0	225	0	22,624	2,262	20,362
1050620	44901	6,548	5,900	0	5,592	480	7,037	0	0	0	0	0	432	1,645	622	2,062	300	0	30,618	3,062	27,556
1050619	31502	4,617	5,730	0	7,160	400	2,931	0	0	1,320	6,170	6,075	6,702	4,456	968	1,031	150	0	47,710	4,771	42,939
1050624	320	3,862	6,200	1,700	4,281	240	5,641	0	0	0	0	0	342	1,276	531	0	150	0	24,223	2,422	21,801
1050528	24101	2,499	2,292	0	49,784	560	360	0	0	0	0	0	720	6,494	440	1,031	150	0	64,330	0	64,330
1050524	24003	4,773	5,157	0	6,322	440	0	0	0	1,320	0	0	342	3,820	927	0	255	0	23,356	0	23,356
1050523	27201	5,112	6,303	0	22,265	240	2,401	0	0	0	0	0	160	1,867	1,056	0	75	0	39,479	3,948	35,531
1050514	27201	9,197	11,760	0	7,103	1,232	480	0	0	0	0	0	446	7,098	1,895	0	330	0	39,541	3,954	35,587
1050531	29701	2,815	5,020	0	6,597	672	0	0	0	0	0	0	214	2,358	487	0	180	0	18,343	1,834	16,509
1050531	245	2,641	2,592	0	9,120	0	56	0	0	0	0	0	225	1,966	399	0	180	0	17,179	1,718	15,461
1050528	24002	3,530	5,157	0	2,762	5,031	423	0	0	0	0	0	109	2,856	1,187	0	300	0	21,355	2,136	19,219
1050605	29701	2,462	3,540	0	3,655	672	0	0	0	0	0	0	176	1,817	352	0	180	0	12,854	1,285	11,569
1050603	277	2,118	5,900	0	2,862	200	28	0	0	0	0	0	232	2,588	440	0	180	0	14,548	1,455	13,093
1050606	24001	1,059	1,146	0	1,360	1,231	0	0	0	0	0	0	86	2,712	571	0	225	0	8,390	0	8,390
1050527	23901	6,359	9,297	0	5,688	6,740	314	0	0	0	0	0	139	2,775	1,235	1,375	75	0	33,997	3,400	30,597
1050531	17404	4,773	10,920	0	11,489	680	1,708	0	0	0	0	0	255	2,091	927	0	225	0	33,068	3,307	29,761
1050601	24202	4,522	4,884	0	3,872	672	0	0	0	0	0	0	333	5,172	839	0	330	0	20,624	2,062	18,562
1050609	28401	1,317	1,480	0	2,473	240	0	0	0	0	0	0	64	437	223	0	75	0	6,309	631	5,678
1050601	41601	6,009	5,730	0	10,760	240	0	0	0	0	0	0	346	5,244	924	0	300	0	29,553	0	29,553
1050613	24003	706	1,180	0	725	0	0	0	0	0	0	0	75	78,879	176	0	75	0	81,816	0	81,816
1050611	28401	1,921	2,019	0	828	240	0	0	0	0	0	0	119	818	399	0	150	0	6,494	649	5,845
1050609	29601	3,672	3,165	0	12,137	840	1,514	0	0	0	0	0	231	1,609	531	0	285	0	23,984	2,398	21,586
1050611	27202	3,022	3,840	0	2,010	5,790	0	0	0	0	0	0	984	15,718	1,013	0	555	0	32,932	0	32,932
1050514	47501	19,775	95,233	4,720	41,595	9,282	25,589	8,760	0	134,590	2,640	5,955	44,982	61,305	3,080	0	2,130	0	459,636	0	459,636
1050615	24101	1,412	3,540	0	2,360	1,231	0	0	0	0	0	0	43	2,391	659	0	225	0	11,861	0	11,861
1050612	24001	3,463	2,619	0	11,322	240	120	0	0	19,530	0	0	3,800	5,826	443	0	150	0	47,513	0	47,513
1050611	178	4,216	4,011	0	6,180	680	80	0	0	0	0	0	318	2,072	663	0	225	0	18,445	1,845	16,600
1050526	24003	10,231	12,660	0	8,751	15,480	160	0	1,520	0	0	0	265	5,789	2,027	0	300	0	57,183	0	57,183
1050615	24101	2,132	2,292	0	1,958	11,700	0	0	0	0	0	0	33	297	264	0	0	0	18,676	0	18,676
1050618	24003	2,084	1,146	0	1,643	1,722	28	0	0	0	0	0	69	376	223	0	75	0	7,366	0	7,366
1050617	245	2,095	3,540	0	2,523	780	270	0	0	0	0	0	138	655	311	0	75	0	10,387	1,039	9,348
1050619	321	3,347	7,080	0	6,336	240	300	0	0	0	0	0	310	10,756	616	0	225	0	29,210	2,921	26,289
1050621	24103	2,118	5,900	0	1,735	1,010	0	0	0	0	0	0	71	1,532	528	0	150	0	13,044	1,304	11,740
1050623	44702	3,157	2,292	0	5,138	780	210	0	0	0	0	0	180	1,258	440	0	150	0	13,605	1,361	12,244
1050625	24101	1,779	1,719	0	2,355	200	60	0	0	0	0	0	80	2,778	352	0	150	0	9,473	0	9,473
1050628	24103	706	1,180	0	345	200	0	0	0	0	0	0	89	77,968	88	0	75	0	80,651	0	80,651
1050527	YYY	2,448	4,140	0	8,226	7,442	5,390	0	0	0	0	0	102	654	355	0	300	0	29,057	0	29,057
1050521	YYY	4,603	12,980	0	5,323	0	180	0	0	0	0	0	88	769	1,056	1,031	75	0	26,105	0	26,105
1050530	YYY	1,059	2,360	0	450	4,822	60	0	0	0	0	0	136	22,807	878	0	450	0	33,022	0	33,022
1050523	YYY	4,998	10,620	0	2,585	15,519	3,460	0	720	0	0	0	2,193	7,014	880	0	255	0	48,244	0	48,244
1050519	41601	5,934	12,700	0	23,040	8,422	3,375	0	0	1,320	0	0	1,297	10,418	1,103	0	375	0	67,984	0	67,984
1050531	YYY	706	1,180	0	0	1,234	0	0	0	0	0	0	105	48,856	483	0	150	0	52,714	0	52,714
1050531	YYY	706	1,180	0	100	1,434	90	0	0	0	0	0	106	1,675	483	0	150	0	5,924	0	5,924
1050531	YYY	706	1,180	0	270	1,234	60	0	0	0	0	0	107	25,992	483	0	150	0	30,182	0	30,182
1050529	YYY	1,412	3,540	0	550	21,131	60	0	0	0	0	0	153	15,418	966	0	450	0	43,680	0	43,680
1050527	YYY	2,485	5,900	0	3,142	13,048	3,634	0	0	0	0	0	8,243	15,650	747	0	225	0	53,074	0	53,074
1050530	YYY	1,059	1,146	0	0	1,234	2,560	0	0	0	0	0	111	14,765	571	0	150	0	21,596	0	21,596
1050531	YYY	706	1,180	0	0	9,539	0	0	0	0	0	0	95	3,103	483	0	150	0	15,256	0	15,256
1050528	YYY	1,765	4,720	0	4,560	4,822	120	0	0	0	0	0	163	62,483	1,054	0	600	0	80,287	0	80,287
1050530	YYY	1,059	2,360	0	0	4,822	120	0	0	0	0	0	126	12,504	878	0	450	0	22,319	0	22,319
1050529	YYY	1,412	3,540	0	420	1,234	60	0	0	1,320	0	0	148	3,812	659	0	375	0	12,980	0	12,980
1050517	YYY	7,079	16,520	0	12,820	25,946	7,276	0	0	1,320	0	6,075	8,733	24,951	2,785	1,031	825	0	115,361	0	115,361
1050531	39903	706	1,180	0	148	5,955	0	0	0	0	0	0	29	20	176	0	0	0	8,214	821	7,393
1050522	39802	5,314	10,040	0	8,483	9,042	7,289	0	0	8,970	0	0	3,442	22,963	883	0	330	0	76,756	0	76,756
1050531	YYY	1,059	2,360	0	450	4,822	30	0	0	0	0	0	115	34,435	878	0	300	0	44,449	0	44,449
1050531	YYY	1,059	2,360	0	200	4,822	90	0	0	0	0	0	117	16,346	878	0	300	0	26,172	0	26,172
1050529	YYY	1,765	4,720	0	450	6,370	60	0	0	0	0	0	128	9,625	1,975	0	600	0	25,693	0	25,693
1050531	YYY	1,059	2,360	0	0	4,822	120	0	0	0	0	0	137	12,431	878	0	300	0	22,107	0	22,107
1050418	YYY	17,706	25,785	730	17,877	54,087	30,471	2,081	0	11,610	0	0	2,437	142,133	5,466	0	1,905	0	312,288	0	312,288
1050517	YYY	9,627	18,880	0	5,699	8,334	12,280	0	0	0	0	0	2,146	16,219	1,850	0	300	0	75,335	0	75,335
1050601	YYY	1,059	2,360	0	730	2,611	90	0	0	0	0	0	114	62,896	571	0	225	0	70,656	0	70,656
1050601	YYY	1,059	2,360	0	0	4,822	40	0	0	0	0	0	201	27,605	878	0	300	0	37,265	0	37,265
1050531	YYY	1,412	3,540	0	750	4,822	150	0	0	0	0	0	173	63,870	966	0	525	0	76,208	0	76,208
1050527	YYY	2,824	8,260	0	2,127	26,205	1,630	0	0	2,640	0	0	3,372	3,373	704	0	225	0	51,360	0	51,360
1050531	YYY	1,412	3,540	0	9,083	360	610	0	0	0	0	0	719	138	352	0	75	0	16,289	0	16,289
1050531	YYY	1,412	3,540	0	4,350	7,389	2,000	0	0	0	0	0	163	16,559	659	0	225	0	36,297	0	36,297
1050516	YYY	8,730	19,480	0	2,618	1,080	3,366	0	0	0	0	0	1,008	6,309	1,587	0	1,275	0	45,453	0	45,453
1050528	YYY	3,403	4,140	1,170	5,196	240	8,029	0	0	970	0	0	528	5,071	487	0	150	0	29,384	0	29,384
1050531	20401	2,095	2,019	0	4,317	7,442	60	0	0	0	0	0	221	409	355	0	150	0	17,068	0	17,068
1050527	YYY	3,911	9,440	0	6,540	4,822	3,904	0	0	0	0	0	8,245	27,871	1,318	0	600	0	66,651	0	66,651
1050531	YYY	1,765	4,720	0	450	15,599	270	0	0	0	0	0	174	5,041	1,668	0	600	0	30,287	0	30,287
1050519	YYY	6,735	9,168	0	6,512	32,897	3,495	0	0	1,320	0	0	6,582	19,159	2,022	0	825	0	88,715	0	88,715
1050507	YYY	11,861	27,031	10,090	3,157	12,233	8,309	0	0	0	0	0	9,101	12,204	3,388	1,031	1,050	0	99,455	0	99,455
1050601	YYY	1,779	3,540	0	7,164	7,189	3,711	0	0	0	0	0	8,158	13,175	761	0	300	0	45,777	0	45,777
1050603	YYY	706	1,180	0	450	1,234	0	0	0	0	0	0	103	18,915	483	0	225	0	23,296	0	23,296
1050603	YYY	706	1,180	0	0	1,234	0	0	0	0	0	0	140	14,008	483	0	225	0	17,976	0	17,976
1050531	YYY	2,132	4,720	0	0	33,957	0	0	0	0	0	0	171	5,174	1,668	0	600	0	48,422	0	48,422
1050521	YYY	7,695	13,580	0	10,242	1,474	5,980	0	560	1,320	0	0	513	68,884	1,498	0	825	0	112,571	0	112,571
1050530	YYY	2,485	5,900	0	5,893	7,233	3,784	8,750	0	0	0	0	8,205	10,166	1,449	0	675	0	54,540	0	54,540
1050603	YYY	1,059	2,360	0	200	4,822	30	0	0	0	0	0	182	54,711	878	0	300	0	64,542	0	64,542
1050603	089	2,358	1,480	0	5,257	4,800	2,745	0	0	0	0	0	143	553	135	0	75	0	17,546	0	17,546
1050603	YYY	1,059	2,360	0	0	4,822	120	0	0	0	0	0	126	16,662	878	0	300	0	26,327	0	26,327
1050603	YYY	1,059	2,360	0	3,731	4,822	120	0	0	0	0	0	117	16,355	878	0	300	0	29,742	0	29,742
1050604	YYY	706	1,180	0	0	1,234	60	0	0	0	0	0	92	23,962	483	0	225	0	27,942	0	27,942
1050526	320	4,922	8,860	0	9,307	480	0	0	0	0	0	0	304	1,377	839	0	225	0	26,314	0	26,314
1050604	YYY	1,073	1,180	0	0	2,411	0	0	0	0	0	0	111	5,620	483	0	150	0	11,028	0	11,028
1050604	YYY	706	1,180	0	100	1,234	0	0	0	0	0	0	96	13,220	483	0	225	0	17,244	0	17,244
1050603	YYY	1,426	2,360	0	600	4,822	180	0	0	0	0	0	129	23,034	878	0	300	0	33,729	0	33,729
1050603	YYY	1,059	2,360	0	0	4,822	0	0	0	0	0	0	148	20,096	878	0	450	0	29,813	0	29,813
1050515		9,234	25,960	7,410	8,431	12,905	19,285	0	1,520	0	0	11,355	16,430	21,058	1,936	0	555	0	136,079	0	136,079
1050603	YYY	1,426	2,360	0	0	4,822	150	0	0	0	0	0	121	16,291	878	0	300	0	26,348	0	26,348
1050604	YYY	706	1,180	0	0	1,234	0	0	0	0	0	0	100	13,071	483	0	225	0	16,999	0	16,999
1050603	YYY	1,059	2,360	0	450	10,977	120	0	0	0	0	0	138	16,438	878	0	300	0	32,720	0	32,720
1050603	YYY	1,059	2,360	0	0	4,822	0	0	0	0	0	0	127	54,670	878	0	375	0	64,291	0	64,291
1050419	YYY	19,109	30,300	0	15,758	273,803	10,144	0	0	5,280	0	0	5,314	13,960	5,791	0	1,725	0	381,184	0	381,184
1050601	YYY	3,265	2,292	0	8,515	7,389	40	0	0	0	0	0	181	30,043	659	0	225	0	52,609	0	52,609
1050603	YYY	1,779	3,540	0	9,706	1,634	3,208	0	0	0	0	0	8,178	41,726	849	0	300	0	70,920	0	70,920
1050528	320	5,328	9,740	0	6,310	200	60	0	0	0	0	0	263	6,484	839	0	225	0	29,449	0	29,449
1050604	17303	1,059	2,360	0	9,702	0	490	0	0	0	0	0	724	55	176	0	75	0	14,641	0	14,641
1050605	YYY	706	1,180	0	204	1,858	30	0	0	0	0	0	96	16,684	483	0	225	0	21,466	0	21,466
1050605	YYY	706	1,180	0	180	1,234	60	0	0	0	0	0	104	41,539	483	0	225	0	45,711	0	45,711
1050604	YYY	1,426	2,360	0	2,720	1,231	120	0	0	1,320	0	0	106	4,665	571	0	375	0	14,894	0	14,894
1050604	YYY	1,059	2,360	0	650	5,022	30	0	0	0	0	0	131	4,629	878	0	300	0	15,059	0	15,059
1050605	YYY	706	1,180	0	2,763	1,234	3,743	0	0	0	0	0	3,871	12,305	585	0	0	0	26,387	0	26,387
1050418	YYY	18,714	56,060	0	14,431	1,000	6,721	0	0	126,990	0	0	37,631	43,614	4,315	0	1,305	0	310,781	0	310,781
1050604	YYY	1,059	2,360	0	330	4,822	120	0	0	0	0	0	162	16,203	878	0	300	0	26,234	0	26,234
1050525	YYY	7,276	14,160	0	4,235	1,820	2,290	0	0	0	0	0	171	4,186	1,103	0	300	0	35,541	0	35,541
1050528	13002	3,941	8,860	0	3,299	6,195	470	0	0	0	0	0	219	2,849	795	0	180	0	26,808	0	26,808
1050605	YYY	706	1,180	0	0	1,234	60	0	0	0	0	0	151	30,706	483	0	225	0	34,745	0	34,745
1050603	YYY	1,779	3,540	0	5,574	1,434	3,694	0	0	0	0	0	8,150	13,283	761	0	225	0	38,440	0	38,440
1050528	YYY	4,264	8,799	0	450	13,911	360	0	3,960	0	0	0	106	14,437	1,494	0	750	0	48,531	0	48,531
1050525	09601	4,942	15,340	0	2,670	200	1,990	0	0	0	0	0	59	3,110	1,144	0	0	0	29,455	0	29,455
1050524		6,171	17,700	0	5,701	39,033	3,560	0	0	0	0	0	389	2,782	1,320	0	300	0	76,956	0	76,956
1050602	YYY	3,319	5,020	0	3,298	7,442	430	0	0	0	0	0	311	2,017	487	0	150	0	22,474	0	22,474
1050605	YYY	1,059	2,360	0	270	2,411	120	0	0	0	0	0	186	11,230	571	0	375	0	18,582	0	18,582
1050528		4,213	10,920	0	4,623	7,742	4,468	0	0	0	0	0	398	2,270	883	0	225	0	35,742	0	35,742
1050603	YYY	1,765	4,720	1,560	2,542	10,480	1,010	0	0	0	0	0	148	7,969	1,361	0	600	0	32,155	0	32,155
1050605	YYY	1,059	2,360	0	925	5,022	60	0	0	0	0	0	235	16,380	878	0	450	0	27,369	0	27,369
1050531	YYY	3,235	7,080	0	3,221	240	370	0	0	0	0	0	114	667	663	0	375	0	15,965	0	15,965
1050604	YYY	1,412	3,540	0	570	4,822	100	0	0	0	0	0	198	53,301	966	0	450	0	65,359	0	65,359
1050606	YYY	706	1,180	0	3,169	200	0	0	0	0	0	0	33	33	176	0	75	0	5,572	0	5,572
1050529	YYY	3,897	10,620	0	10,923	400	1,669	13,596	0	0	0	6,075	4,275	1,019	704	0	75	0	53,253	0	53,253
1050605	YYY	1,059	2,360	0	450	4,822	60	0	0	0	0	0	148	10,329	878	0	450	0	20,556	0	20,556
1050509	41601	17,408	102,080	10,920	24,540	10,995	7,918	0	0	5,670	0	0	4,421	59,297	2,640	0	2,130	0	248,019	0	248,019
1050605	YYY	1,059	2,360	0	9,392	200	1,197	0	0	0	0	0	679	7	88	0	0	0	14,982	0	14,982
1050605	YYY	1,426	2,360	0	450	5,382	60	0	0	0	0	0	163	20,364	878	0	450	0	31,533	0	31,533
1050605	YYY	1,059	2,360	0	570	4,269	120	0	0	0	0	0	134	54,925	878	0	375	0	64,690	0	64,690
1050607	YYY	706	573	0	0	1,858	30	0	0	0	0	0	104	28,078	483	0	150	0	31,982	0	31,982
1050419	YYY	19,627	58,120	0	9,802	217,034	3,260	0	0	0	0	0	1,464	13,081	5,675	1,031	1,875	0	330,969	0	330,969
1050524	YYY	5,648	17,700	0	3,351	7,389	1,625	0	0	0	0	0	416	33,487	1,627	0	375	0	71,618	0	71,618
1050606	YYY	1,059	2,360	0	270	10,777	60	0	0	0	0	0	133	34,470	878	0	450	0	50,457	0	50,457
1050422		18,201	54,880	0	10,141	154,053	14,655	0	0	1,320	0	0	2,027	21,967	4,139	0	1,260	0	282,643	0	282,643
1050528	41601	4,970	12,980	0	7,247	5,222	550	0	0	1,320	0	0	637	35,494	1,670	0	600	0	70,690	0	70,690
1050606	YYY	1,059	2,360	0	600	4,822	90	0	0	0	0	0	140	14,478	878	0	450	0	24,877	0	24,877
1050605	182	1,742	2,360	0	1,851	240	0	0	0	0	0	0	174	967	311	0	150	0	7,795	0	7,795
1050527	182	5,272	14,160	0	4,811	1,511	420	0	0	1,320	0	0	363	8,080	1,451	0	375	0	37,763	0	37,763
1050606	YYY	1,059	2,360	0	0	4,822	30	0	0	0	0	0	120	54,639	878	0	300	0	64,208	0	64,208
1050605	41601	2,451	1,173	0	6,549	2,160	1,137	0	0	0	0	0	4,227	1,078	267	0	150	0	19,192	0	19,192
1050410	48301	23,524	35,594	12,820	11,609	29,480	46,037	7,708	0	5,280	0	18,570	16,222	38,852	5,894	0	1,800	0	253,390	0	253,390
1050607	YYY	706	1,180	0	0	1,234	0	0	0	0	0	0	106	15,234	483	0	225	0	19,168	0	19,168
1050528	YYY	6,401	11,220	0	8,510	150,272	3,255	0	320	0	0	0	672	6,449	971	0	750	0	188,820	0	188,820
1050607	YYY	1,059	2,360	0	0	1,234	120	0	0	0	0	0	149	38,095	571	0	225	0	43,813	0	43,813
1050608	YYY	706	573	0	0	1,234	30	0	0	0	0	0	95	24,747	483	0	225	0	28,093	0	28,093
1050605	YYY	1,765	4,720	0	984	9,644	210	0	0	0	0	0	175	4,861	1,668	0	450	0	24,477	0	24,477
1050607	YYY	1,059	2,360	0	0	10,777	60	0	0	0	0	0	69	54,614	878	0	300	0	70,117	0	70,117
1050606	YYY	1,412	3,540	0	0	4,822	120	0	0	0	0	0	146	12,547	966	0	525	0	24,078	0	24,078
1050607	YYY	1,059	2,360	0	0	4,822	30	0	0	0	0	0	116	16,090	878	0	450	0	25,805	0	25,805
1050604	YYY	2,118	5,900	0	0	5,155	240	0	0	0	0	0	181	46,305	2,063	0	600	0	62,562	0	62,562
1050607	YYY	1,059	2,360	0	1,070	10,977	30	0	0	1,320	0	0	159	7,195	878	0	525	0	25,573	0	25,573
1050516	YYY	9,889	27,440	0	6,402	80,899	5,302	0	0	0	0	0	718	5,757	2,349	0	600	0	139,356	0	139,356
1050502		15,565	44,260	9,750	18,295	119,560	21,947	0	0	0	0	0	1,929	4,608	3,347	0	450	0	239,711	0	239,711
1050425	39803	18,103	53,100	0	23,472	6,195	2,820	0	0	169,440	0	0	53,032	39,807	4,095	0	1,200	0	371,264	51,761	319,503
1050608	YYY	1,059	2,360	0	250	1,234	2,000	0	0	0	0	0	100	12,326	571	0	150	0	20,050	0	20,050
1050508	18805	13,103	38,940	0	1,110	0	1,170	0	0	0	0	0	363	21,807	2,992	0	525	0	80,010	0	80,010
1050513	YYY	10,971	33,040	0	11,936	27,555	60	0	0	70,680	0	0	24,966	81,988	3,999	0	1,455	0	266,650	0	266,650
1050608	YYY	1,059	2,360	0	0	4,822	30	0	0	0	0	0	134	16,205	878	0	300	0	25,788	0	25,788
1050608	YYY	1,059	2,360	0	700	4,822	90	0	0	0	0	0	126	65,607	878	0	300	0	75,942	0	75,942
1050608	YYY	1,059	2,360	0	450	1,858	60	0	0	0	0	0	108	19,218	571	0	225	0	25,909	0	25,909
1050608	YYY	1,059	2,360	0	450	10,777	0	0	0	0	0	0	134	16,269	878	0	450	0	32,377	0	32,377
1050607	YYY	1,412	3,540	0	450	4,822	1,800	0	0	0	0	0	206	53,986	966	0	525	0	67,707	0	67,707
1050607	YYY	1,412	3,540	680	0	1,031	1,095	0	0	0	0	0	117	703	659	0	375	0	9,612	0	9,612
1050605	29601	2,274	5,020	0	2,132	16,789	237	0	0	0	0	0	243	1,343	487	0	150	0	28,675	0	28,675
1050521	YYY	7,780	23,600	0	6,616	7,832	960	0	0	24,930	0	0	9,545	68,934	3,076	0	1,275	0	154,548	0	154,548
1050606	YYY	1,765	4,720	0	450	7,189	274	0	0	0	0	0	172	76,758	747	0	300	0	92,375	0	92,375
1050429	YYY	26,313	166,976	6,460	34,584	13,118	44,873	0	2,400	23,610	0	0	10,515	71,967	5,322	0	3,855	0	409,993	0	409,993
1050610	YYY	1,440	1,180	0	3,702	2,484	0	0	0	0	0	0	177	90,028	673	0	225	0	99,909	0	99,909
1050603	41601	3,874	8,560	0	8,774	5,060	4,031	0	0	0	0	0	2,300	1,961	751	0	225	0	35,536	0	35,536
1050528	YYY	7,286	14,760	0	5,036	1,271	718	0	320	1,320	0	0	785	9,678	1,542	0	480	0	43,196	0	43,196
1050607	YYY	1,765	2,292	0	0	26,444	47	0	0	0	0	0	176	4,684	1,668	0	600	0	37,676	0	37,676
1050610	YYY	706	1,180	0	4,280	1,339	0	0	0	0	0	0	139	5,454	483	0	225	0	13,806	0	13,806
1050607	YYY	2,132	4,720	0	2,419	1,434	3,484	0	0	0	0	0	8,228	57,664	747	0	375	0	81,203	0	81,203
1050527	YYY	7,681	15,060	0	9,050	880	12,095	0	1,200	0	0	0	3,993	21,489	1,279	0	150	0	72,877	0	72,877
1050610	YYY	706	1,180	0	550	1,234	0	0	0	0	0	0	98	24,032	483	0	150	0	28,433	0	28,433
1050531	20201	8,166	47,092	0	11,842	440	8,381	0	0	2,290	0	0	2,688	22,521	1,056	0	1,200	0	105,676	0	105,676
1050605	39902	3,535	6,200	0	2,681	240	0	0	0	0	0	0	287	20,343	575	0	225	0	34,086	0	34,086
1050611	YYY	706	1,180	0	0	1,234	0	0	0	0	0	0	196	35,476	483	0	225	0	39,500	0	39,500
1050610	YYY	1,426	2,360	0	0	1,858	60	0	0	0	0	0	108	12,365	571	0	225	0	18,973	0	18,973
1050604	YYY	6,450	8,260	0	6,760	800	6,610	0	0	5,980	0	0	470	2,618	751	0	225	0	38,924	0	38,924
1050610	YYY	1,059	2,360	0	200	4,822	0	0	0	0	0	0	121	27,179	878	0	450	0	37,069	0	37,069
1050610	YYY	1,059	2,360	0	0	1,234	60	0	0	0	0	0	124	17,788	571	0	225	0	23,421	0	23,421
1050518	07903	9,178	29,500	0	3,772	0	2,726	0	0	0	0	0	330	6,071	2,288	0	675	0	54,540	0	54,540
1050610	YYY	1,059	2,360	0	450	10,777	60	0	0	0	0	0	135	16,088	878	0	450	0	32,257	0	32,257
1050611	YYY	1,073	1,180	0	0	1,234	60	0	0	0	0	0	96	12,209	483	0	150	0	16,485	0	16,485
1050607	YYY	2,838	7,080	0	770	53,368	90	0	0	0	0	0	158	1,508	2,151	0	1,125	0	69,088	0	69,088
1050611	YYY	1,059	2,360	0	450	4,822	0	0	0	0	0	0	120	26,914	878	0	450	0	37,053	0	37,053
1050608	39802	3,535	5,900	0	3,208	240	60	0	0	0	0	0	307	6,825	528	0	150	0	20,753	0	20,753
1050611	YYY	1,059	2,360	0	0	4,822	2,210	0	0	0	0	0	130	54,676	878	0	300	0	66,435	0	66,435
1050609		5,115	4,720	0	6,218	3,000	3,044	0	0	1,320	0	0	1,207	4,270	399	0	180	0	29,473	0	29,473
1050530	YYY	6,396	8,022	0	1,610	5,022	900	0	0	1,320	0	0	773	19,264	1,934	0	705	0	45,946	0	45,946
1050606	YYY	2,824	8,260	0	1,160	16,833	120	0	0	0	0	0	179	7,620	2,151	0	1,050	0	40,197	0	40,197
1050610	YYY	1,412	3,540	0	0	7,233	60	0	0	0	0	0	142	8,331	1,273	0	450	0	22,441	0	22,441
1050613		1,403	1,180	0	2,316	240	1,289	0	0	0	0	0	81	402	88	0	75	0	7,074	0	7,074
1050609	YYY	1,765	4,720	0	1,370	6,994	120	0	0	0	0	0	142	9,205	1,975	0	750	0	27,041	0	27,041
1050607	YYY	3,558	8,260	0	12,002	6,355	3,484	0	0	0	0	0	8,147	471	704	0	75	0	43,056	0	43,056
1050612	YYY	1,059	2,360	0	1,030	3,702	555	0	0	1,320	0	0	170	11,606	1,185	0	450	0	23,437	0	23,437
1050611	YYY	1,412	1,719	0	40	13,188	120	0	0	0	0	0	234	6,358	1,273	0	600	0	24,944	0	24,944
1050519	YYY	2,485	2,865	1,950	1,730	0	3,948	0	0	0	0	0	225	603	528	0	75	0	14,409	0	14,409
1050611	YYY	1,412	1,719	0	3,362	7,189	180	0	0	0	0	0	132	24,004	849	0	225	0	39,072	0	39,072
1050608	39902	3,672	5,020	0	2,688	240	0	0	0	0	0	0	291	6,970	443	0	150	0	19,474	0	19,474
1050531	YYY	7,093	15,640	0	5,354	7,802	3,300	2,081	0	0	0	0	1,394	27,934	1,232	0	300	0	72,130	0	72,130
1050613	YYY	706	1,180	0	0	1,234	30	0	0	0	0	0	95	21,945	483	0	225	0	25,898	0	25,898
1050613	YYY	706	1,180	0	450	1,234	30	0	0	0	0	0	104	8,255	483	0	225	0	12,667	0	12,667
1050531	04004	7,802	14,460	0	31,942	240	4,014	1,473	0	12,520	0	0	8,741	7,577	1,191	0	405	0	90,365	0	90,365
1050613	YYY	706	1,180	0	500	1,234	30	0	0	0	0	0	101	4,100	483	0	225	0	8,559	0	8,559
1050610	YYY	2,118	5,900	0	680	7,233	140	0	0	0	0	0	103	21,902	1,449	0	525	0	40,050	0	40,050
1050527	YYY	7,794	22,420	0	6,436	12,426	7,728	0	0	11,610	0	0	9,217	107,364	3,119	0	1,050	0	189,164	0	189,164
1050610	12202	4,612	21,560	0	11,384	6,682	2,520	0	0	560	0	0	684	4,249	528	0	600	0	53,379	5,338	48,041
1050603	YYY	4,956	6,876	3,060	3,018	6,155	7,311	0	0	0	0	0	1,229	3,539	1,056	0	300	0	37,500	0	37,500
1050614	YYY	1,073	1,180	0	800	9,600	90	0	0	1,320	0	0	141	3,133	483	0	225	0	18,045	0	18,045
1050614	YYY	706	1,180	0	0	2,411	60	0	0	0	0	0	104	10,499	483	0	300	0	15,743	0	15,743
1050602	YYY	7,643	13,580	0	5,207	680	12,032	0	0	0	0	0	543	4,129	1,103	0	300	0	45,217	0	45,217
1050610	YYY	2,485	5,900	0	1,620	2,058	3,634	0	0	0	0	0	8,179	16,493	747	0	300	0	41,416	0	41,416
1050613	YYY	1,059	2,360	0	0	1,234	0	0	0	0	0	0	42	51,190	571	0	375	0	56,831	0	56,831
1050610	YYY	2,118	5,900	0	3,987	7,189	210	0	0	10,290	0	0	403	4,353	835	0	450	0	35,735	0	35,735
1050613	YYY	1,059	2,360	0	450	10,977	90	0	0	0	0	0	252	16,180	878	0	450	0	32,696	0	32,696
1050529	YYY	4,580	9,440	0	3,893	8,700	320	0	0	2,640	0	0	371	8,163	1,541	0	1,125	0	40,773	0	40,773
1050614	YYY	706	573	0	0	1,234	60	0	0	0	0	0	104	11,561	483	0	225	0	14,946	0	14,946
1050613	YYY	1,059	1,146	0	0	4,822	90	0	0	0	0	0	141	4,702	878	0	300	0	13,138	0	13,138
1050611	YYY	1,765	4,720	1,360	0	25,953	60	0	0	0	0	0	172	4,844	1,668	0	600	0	41,142	0	41,142
1050517		13,450	35,700	11,060	17,348	17,500	25,920	0	320	3,960	0	0	1,463	21,765	2,687	0	1,005	0	152,178	0	152,178
1050612	41601	2,867	2,292	0	3,597	0	6,764	0	0	0	0	0	396	2,449	399	0	450	0	19,214	0	19,214
1050615	YYY	706	1,180	0	0	1,234	30	0	0	0	0	0	101	16,044	483	0	150	0	19,928	0	19,928
1050614	YYY	1,426	2,360	780	200	4,822	1,417	0	0	0	0	0	211	16,171	878	0	300	0	28,565	0	28,565
1050614	YYY	1,426	2,360	0	0	4,822	60	0	0	0	0	0	113	26,978	878	0	300	0	36,937	0	36,937
1050614	YYY	1,059	2,360	0	750	3,702	30	0	0	1,320	0	0	137	5,119	1,185	0	450	0	16,112	0	16,112
1050609	YYY	4,025	7,380	0	7,842	680	3,060	0	0	0	0	0	360	6,288	663	0	225	0	30,523	0	30,523
1050613	YYY	1,779	3,540	0	600	5,022	90	0	0	0	0	0	150	16,847	966	0	375	0	29,369	0	29,369
1050616		1,893	1,146	0	2,264	240	1,007	0	0	0	0	0	176	274	135	0	75	0	7,210	0	7,210
1050614	YYY	1,412	1,719	0	450	5,022	60	0	0	0	0	0	141	71,264	966	0	525	0	81,559	0	81,559
1050530	YYY	2,824	7,080	0	900	15,799	300	0	0	0	0	0	349	151,714	1,932	0	1,050	0	181,948	0	181,948
1050615	YYY	1,059	2,360	0	0	1,234	30	0	0	0	0	0	126	13,412	571	0	225	0	19,017	0	19,017
1050531	YYY	6,354	9,741	0	1,700	3,293	480	0	0	0	0	0	447	49,725	2,505	0	825	0	75,070	0	75,070
1050531	YYY	2,118	3,506	0	900	15,599	120	0	0	0	0	0	194	108,855	1,756	0	750	0	133,798	0	133,798
1050601	YYY	2,118	4,720	0	0	9,644	0	0	0	0	0	0	247	32,327	1,756	0	600	0	51,412	0	51,412
1050605	YYY	5,112	13,280	0	4,376	720	1,610	0	0	0	0	0	618	4,092	1,103	0	375	0	31,286	0	31,286
1050530	YYY	9,464	20,360	1,070	16,801	4,480	15,580	0	0	1,320	0	0	548	41,139	1,631	0	525	0	112,918	0	112,918
1050615	YYY	1,059	2,360	0	0	10,777	0	0	0	0	0	0	132	16,094	878	0	300	0	31,600	0	31,600
1050515	41601	13,626	36,880	0	43,192	6,795	4,950	0	0	29,160	0	0	11,370	26,627	2,907	0	855	0	176,362	18,655	157,707
1050611	YYY	3,558	8,260	0	10,443	7,189	3,604	0	0	0	0	0	9,430	60,434	1,011	0	300	0	104,229	0	104,229
1050521	YYY	12,483	30,400	0	20,818	42,490	15,723	0	0	6,910	0	0	5,361	71,966	2,423	0	780	0	209,354	0	209,354
1050617	YYY	706	1,180	340	0	1,234	574	0	0	0	0	0	94	14,239	483	0	225	0	19,075	0	19,075
1050615	YYY	1,412	3,540	0	450	4,822	0	0	0	0	0	0	146	16,208	966	0	525	0	28,069	0	28,069
1050615	YYY	1,779	3,540	0	0	1,234	60	0	0	0	0	0	77	67,459	571	0	225	0	74,945	0	74,945
1050601	YYY	2,118	4,720	0	0	9,844	0	0	0	0	0	0	298	32,245	1,756	0	600	0	51,581	0	51,581
1050617	YYY	1,073	573	0	560	1,434	60	0	0	0	0	0	93	28,810	483	0	225	0	33,311	0	33,311
1050617	YYY	706	1,180	0	0	1,234	30	0	0	0	0	0	32	12,988	483	0	225	0	16,878	0	16,878
1050617	YYY	1,059	2,360	0	0	1,234	0	0	0	0	0	0	110	13,868	571	0	375	0	19,577	0	19,577
1050618	YYY	706	1,180	0	0	1,234	30	0	0	0	0	0	104	11,614	483	0	225	0	15,576	0	15,576
1050606	41601	6,566	14,460	0	10,959	680	9,310	0	0	2,640	0	0	585	19,848	1,191	0	555	0	66,794	0	66,794
1050610	ZZZ	4,227	9,740	0	3,113	240	2,850	0	880	970	0	0	189	3,062	839	0	75	0	26,185	0	26,185
1050617	YYY	1,059	2,360	0	450	10,777	60	0	0	0	0	0	173	12,593	878	0	300	0	28,650	0	28,650
1050617	YYY	1,426	2,360	0	0	21,030	120	0	0	0	0	0	149	15,250	878	0	450	0	41,663	0	41,663
1050609	YYY	4,617	11,800	0	5,825	6,034	8,294	0	0	0	0	0	10,070	3,346	1,275	0	150	0	51,411	0	51,411
1050616	YYY	1,412	3,540	0	0	7,233	30	0	0	0	0	0	171	5,905	1,273	0	450	0	20,014	0	20,014
1050515	YYY	14,848	39,240	7,210	19,128	18,935	25,379	0	0	0	0	0	1,556	17,246	3,036	0	855	0	147,433	0	147,433
1050619	YYY	353	1,180	0	0	1,234	30	0	0	0	0	0	121	33,479	395	0	150	0	36,942	0	36,942
1050617	YYY	1,059	2,360	0	0	4,822	150	0	0	0	0	0	123	12,446	878	0	300	0	22,138	0	22,138
1050603	YYY	2,118	4,720	0	1,250	9,644	30	0	0	0	0	0	262	32,362	1,756	0	750	0	52,892	0	52,892
1050614	YYY	2,485	5,900	0	1,070	11,787	60	0	0	0	0	0	211	21,907	1,756	0	675	0	45,851	0	45,851
1050604	YYY	2,118	4,720	0	0	9,644	210	0	0	0	0	0	243	179,388	1,756	0	750	0	198,829	0	198,829
1050615	YYY	1,765	4,720	0	1,220	7,433	655	0	0	1,320	0	0	282	21,845	1,361	0	600	0	41,201	0	41,201
1050620	YYY	353	1,180	0	50	1,234	0	0	0	0	0	0	93	12,347	395	0	150	0	15,802	0	15,802
1050618	YYY	1,059	2,360	0	0	0	0	0	0	0	0	0	85	91	264	0	75	0	3,934	0	3,934
1050517	YYY	14,153	38,940	0	24,890	151,221	11,808	0	0	0	0	0	19,766	24,809	6,416	0	2,400	0	294,403	0	294,403
1050617	YYY	1,412	1,719	0	1,350	1,234	90	0	0	11,340	0	0	213	4,539	659	0	225	0	22,781	0	22,781
1050610	YYY	5,535	11,800	0	4,301	7,673	2,110	0	0	0	0	0	455	17,623	1,889	0	705	0	52,091	0	52,091
1050615	YYY	2,118	5,900	0	216	1,434	2,450	0	0	0	0	0	165	8,129	835	0	600	0	21,847	0	21,847
1050531	YYY	3,544	8,260	0	900	15,799	330	0	560	0	0	0	440	9,301	2,020	0	975	0	42,129	0	42,129
1050603	YYY	2,118	4,720	0	1,050	9,844	240	0	0	0	0	0	250	32,353	1,756	0	600	0	52,931	0	52,931
1050618	YYY	1,059	2,360	0	1,954	7,389	120	0	0	0	0	0	139	12,092	571	0	225	0	25,909	0	25,909
1050618	YYY	1,059	2,360	0	0	4,822	60	0	0	0	0	0	172	45,653	878	0	450	0	55,454	0	55,454
1050604	YYY	2,118	3,506	0	0	9,644	120	0	0	0	0	0	248	109,353	1,756	0	600	0	127,345	0	127,345
1050619	YYY	706	1,180	0	0	2,411	60	0	0	0	0	0	52	11,922	483	0	300	0	17,114	0	17,114
1050618	39706	1,215	1,480	0	3,919	240	60	0	0	4,620	0	0	147	467	179	0	75	0	12,402	1,240	11,162
1050619	YYY	706	1,180	0	0	1,858	0	0	0	0	0	0	100	26,640	483	0	150	0	31,117	0	31,117
1050619	YYY	1,059	2,360	0	450	4,822	90	0	0	0	0	0	114	26,924	878	0	450	0	37,147	0	37,147
1050619	YYY	1,059	2,360	0	3,352	4,822	30	0	0	0	0	0	77	14,689	1,068	0	450	0	27,907	0	27,907
1050618	YYY	1,412	3,540	0	0	7,233	60	0	0	0	0	0	145	5,998	1,273	0	600	0	20,261	0	20,261
1050523	YYY	6,368	17,700	0	10,506	21,554	4,563	0	0	0	0	0	4,062	33,087	2,914	0	1,200	0	101,954	0	101,954
1050605	YYY	2,824	7,080	0	1,150	9,644	210	0	0	0	0	0	730	95,039	1,932	0	1,050	0	119,659	0	119,659
1050605	YYY	2,471	5,900	0	1,050	15,799	180	0	0	0	0	0	358	29,014	1,844	0	975	0	57,591	0	57,591
1050620	YYY	706	1,180	0	450	1,031	60	0	0	0	0	0	85	113	483	0	225	0	4,333	0	4,333
1050619	YYY	1,059	2,360	0	450	1,234	0	0	0	0	0	0	53	21,341	571	0	300	0	27,368	0	27,368
1050621	YYY	706	1,180	0	880	3,431	1,160	0	0	0	0	0	4,596	3,748	483	0	150	0	16,334	0	16,334
1050531	YYY	4,617	5,764	0	10,538	8,823	3,484	0	0	0	0	0	9,535	109,539	1,582	0	600	0	154,482	0	154,482
1050620	YYY	1,059	2,360	0	0	4,822	90	0	0	0	0	0	194	16,605	878	0	300	0	26,308	0	26,308
1050619	YYY	1,412	3,540	0	4,402	8,623	60	0	0	2,640	0	0	1,453	15,229	1,156	0	375	0	38,890	0	38,890
1050621	YYY	1,073	1,180	0	0	1,234	30	0	0	0	0	0	170	48,877	483	0	150	0	53,197	0	53,197
1050622	YYY	353	573	0	0	1,234	30	0	0	0	0	0	105	67,574	395	0	150	0	70,414	0	70,414
1050528	YYY	10,651	23,600	0	21,514	8,629	15,187	0	0	3,960	0	0	6,917	123,889	2,243	0	855	0	217,445	0	217,445
1050611	320	5,653	12,980	3,850	2,267	5,340	11,542	0	0	0	0	0	573	3,663	1,056	0	300	0	47,224	0	47,224
1050620	YYY	1,426	2,360	0	600	5,022	3,964	0	0	0	0	0	8,168	16,157	878	0	300	0	38,875	0	38,875
1050621	YYY	706	573	0	0	1,234	30	0	0	0	0	0	95	3,399	483	0	150	0	6,670	0	6,670
1050603	07902	8,124	21,240	6,580	9,897	4,440	20,048	0	0	0	0	0	4,559	9,004	1,865	0	480	0	86,237	0	86,237
1050621	YYY	706	1,180	0	0	1,234	120	0	0	0	0	0	104	85,024	483	0	150	0	89,001	0	89,001
1050620	YYY	1,059	1,146	0	0	4,822	60	0	0	0	0	0	124	16,212	878	0	450	0	24,751	0	24,751
1050621	YYY	706	573	0	0	1,234	60	0	0	0	0	0	293	10,906	483	0	150	0	14,405	0	14,405
1050620	YYY	1,059	2,360	0	0	4,822	30	0	0	0	0	0	122	54,634	878	0	300	0	64,205	0	64,205
1050617	YYY	2,118	5,900	0	0	12,055	460	0	0	0	0	0	68	2,934	2,063	0	900	0	26,498	0	26,498
1050621	YYY	706	1,180	0	450	1,234	30	0	0	0	0	0	104	63,009	483	0	225	0	67,421	0	67,421
1050620	YYY	1,426	2,360	0	0	4,822	3,544	0	0	0	0	0	8,224	16,306	878	0	450	0	38,010	0	38,010
1050621	YYY	1,059	2,360	0	200	4,822	150	0	0	0	0	0	128	54,664	878	0	300	0	64,561	0	64,561
1050622	YYY	706	1,180	0	0	1,858	0	0	0	0	0	0	107	32,440	483	0	225	0	36,999	0	36,999
1050607	YYY	2,118	4,720	0	900	9,644	270	0	0	0	0	0	241	97,480	1,756	0	825	0	117,954	0	117,954
1050607	YYY	2,118	4,720	0	1,425	9,644	60	0	0	0	0	0	177	60,413	1,756	0	750	0	81,063	0	81,063
1050621	YYY	1,059	2,360	0	450	10,777	150	0	0	0	0	0	136	12,428	878	0	450	0	28,688	0	28,688
1050621	YYY	1,059	2,360	0	820	4,822	150	0	0	0	0	0	121	4,495	878	0	450	0	15,155	0	15,155
1050522		13,080	18,363	0	7,247	240	11,980	14,978	0	5,280	0	6,075	4,892	25,717	2,819	0	825	0	111,496	0	111,496
1050621	YYY	1,059	2,360	0	450	4,822	60	0	0	0	0	0	123	22,780	878	0	450	0	32,982	0	32,982
1050619	YYY	1,765	4,720	0	890	9,644	270	0	0	1,320	0	0	211	5,828	1,668	0	750	0	27,066	0	27,066
1050620	YYY	1,412	3,540	0	1,890	5,022	150	0	0	0	0	0	198	14,613	966	0	525	0	28,316	0	28,316
1050621	YYY	1,059	2,360	0	450	4,822	90	0	0	0	0	0	114	16,132	878	0	525	0	26,430	0	26,430
1050621	YYY	1,059	2,360	0	450	4,822	150	0	0	0	0	0	120	16,139	878	0	450	0	26,428	0	26,428
1050607	YYY	2,118	4,720	0	1,300	9,844	120	0	0	0	0	0	255	47,058	1,756	0	750	0	67,921	0	67,921
1050617	YYY	3,888	6,200	0	805	5,422	30	0	0	0	0	0	445	62,747	1,233	0	630	0	81,400	0	81,400
1050616	41601	6,598	9,440	0	3,331	680	11,447	0	320	1,320	0	0	464	3,159	751	0	225	0	37,735	0	37,735
1050607	YYY	6,721	20,060	0	8,092	200	10,105	0	0	2,640	0	0	2,702	8,088	1,584	0	630	0	60,822	0	60,822
1050606	YYY	2,471	4,079	0	130	15,599	90	0	0	0	0	0	312	32,609	1,844	0	825	0	57,959	0	57,959
1050622	YYY	1,059	2,360	0	0	4,822	30	0	0	0	0	0	133	16,474	878	0	300	0	26,056	0	26,056
1050622	YYY	1,059	2,360	0	500	1,234	150	0	0	1,320	0	0	129	24,097	571	0	225	0	31,645	0	31,645
1050620	YYY	1,765	4,720	0	490	1,234	240	0	0	0	0	0	249	4,070	747	0	375	0	13,890	0	13,890
1050622	YYY	1,059	2,360	0	0	4,822	90	0	0	0	0	0	122	54,646	878	0	300	0	64,277	0	64,277
1050611	YYY	6,043	11,091	3,310	5,082	14,655	2,136	11,677	880	1,320	0	6,075	454	1,603	1,422	0	375	0	66,123	0	66,123
1050602	01405	9,320	24,780	6,630	11,134	15,500	2,960	0	8,120	0	0	0	744	9,535	1,983	0	930	0	91,636	0	91,636
1050622	YYY	1,059	2,360	0	450	4,822	450	0	0	0	0	0	121	4,566	878	0	450	0	15,156	0	15,156
1050621	YYY	1,412	1,719	0	0	4,822	150	0	0	0	0	0	143	62,014	966	0	375	0	71,601	0	71,601
1050606	YYY	2,118	4,720	0	940	9,644	210	0	0	0	0	0	247	32,859	1,756	0	900	0	53,394	0	53,394
1050613	089	5,535	11,220	0	10,116	6,195	3,913	0	0	8,700	0	0	1,811	5,237	927	0	330	0	53,984	0	53,984
1050622	YYY	1,059	1,146	0	270	4,822	90	0	0	0	0	0	125	52,919	878	0	450	0	61,759	0	61,759
1050621	YYY	1,765	4,720	0	470	4,822	180	0	0	0	0	0	139	71,338	1,054	0	525	0	85,013	0	85,013
1050624	YYY	706	1,180	0	0	1,234	60	0	0	0	0	0	102	56,312	483	0	225	0	60,302	0	60,302
1050624	YYY	706	1,180	0	0	1,234	90	0	0	0	0	0	104	12,402	483	0	225	0	16,424	0	16,424
1050529	089	11,856	24,500	0	10,003	1,360	4,558	0	0	2,640	0	0	1,017	22,164	2,074	0	885	0	81,057	0	81,057
1050606	YYY	7,794	22,420	0	6,416	8,032	600	0	0	23,610	0	0	7,841	59,162	2,988	0	1,155	0	140,018	0	140,018
1050614	320	5,126	6,030	0	5,308	440	815	0	0	1,320	0	0	809	27,492	971	0	300	0	48,611	0	48,611
1050607	YYY	3,530	9,440	0	900	9,644	180	0	0	0	0	0	456	33,192	2,108	0	1,050	0	60,500	0	60,500
1050624	YYY	706	1,180	0	0	1,234	30	0	0	0	0	0	28	46,769	483	0	375	0	50,805	0	50,805
1050612	YYY	5,567	14,160	0	4,215	8,876	4,134	0	0	0	0	0	8,725	30,332	1,498	0	525	0	78,032	0	78,032
1050624	YYY	706	1,180	0	270	1,234	30	0	0	0	0	0	98	16,722	483	0	225	0	20,948	0	20,948
1050607	YYY	2,118	4,720	0	270	9,644	180	0	0	0	0	0	276	32,501	1,756	0	900	0	52,365	0	52,365
1050609	YYY	2,471	5,900	0	1,858	9,644	150	0	0	0	0	0	232	9,260	1,756	0	600	0	31,871	0	31,871
1050605	YYY	3,530	9,440	0	900	9,844	1,140	0	0	0	0	0	336	19,625	2,108	0	1,050	0	47,973	0	47,973
1050610	320	7,065	17,700	0	9,531	4,440	9,020	0	320	0	0	0	2,060	6,711	1,455	0	450	0	58,752	0	58,752
1050618	YYY	4,645	9,440	0	29,655	4,520	448	2,081	0	0	0	0	2,840	36,266	792	1,031	450	0	92,168	0	92,168
1050616	YYY	1,412	2,360	0	180	2,468	30	0	0	0	0	0	187	1,548	966	0	375	0	9,526	0	9,526
1050624	YYY	1,059	2,360	0	0	10,777	30	0	0	0	0	0	127	34,416	878	0	300	0	49,947	0	49,947
1050621	YYY	2,118	2,865	0	0	4,822	90	0	0	0	0	0	76	16,164	1,142	0	375	0	27,652	0	27,652
1050625	YYY	706	1,180	0	0	1,234	30	0	0	0	0	0	99	13,180	483	0	225	0	17,137	0	17,137
1050625	YYY	706	1,180	0	450	1,031	60	0	0	0	0	0	99	4,552	483	0	225	0	8,786	0	8,786
1050622	YYY	1,765	4,720	0	0	13,188	210	0	0	0	0	0	173	5,169	1,361	0	675	0	27,261	0	27,261
1050624	YYY	1,059	2,360	0	0	14,577	90	0	0	0	0	0	147	16,087	878	0	450	0	35,648	0	35,648
1050613	YYY	3,618	3,506	0	1,520	10,977	90	0	0	0	0	0	295	17,955	1,142	0	525	0	39,628	0	39,628
1050625	YYY	706	1,180	0	0	1,234	90	0	0	0	0	0	34	13,065	483	0	150	0	16,942	0	16,942
1050609	YYY	7,088	10,348	3,600	2,597	41,955	2,009	0	0	0	0	0	841	8,988	1,891	0	630	0	79,947	0	79,947
1050625	YYY	706	1,180	0	450	1,234	30	0	0	0	0	0	103	18,872	483	0	150	0	23,208	0	23,208
1050623	182	2,390	3,540	0	4,556	480	0	0	0	0	0	0	169	3,027	311	0	150	0	14,623	0	14,623
1050624	YYY	1,059	2,360	0	0	4,822	60	0	0	0	0	0	118	31,868	878	0	450	0	41,615	0	41,615
1050610	YYY	7,102	18,880	0	19,653	8,213	7,388	0	0	2,640	0	0	16,926	19,025	1,803	0	1,530	0	103,160	0	103,160
1050611	YYY	6,320	16,520	0	13,445	27,692	2,017	0	0	0	0	0	19,617	5,649	1,323	0	150	0	92,733	0	92,733
1050625	YYY	706	573	0	0	1,234	60	0	0	0	0	0	53	68,962	483	0	375	0	72,446	0	72,446
1050624	YYY	1,059	2,360	0	80	10,777	90	0	0	0	0	0	154	64,040	878	0	450	0	79,888	0	79,888
1050608	YYY	2,118	4,720	0	1,656	15,799	150	0	0	0	0	0	266	29,453	1,756	0	900	0	56,818	0	56,818
1050624	YYY	1,059	2,360	0	450	4,822	60	0	0	0	0	0	131	16,205	878	0	300	0	26,265	0	26,265
1050609	YYY	2,118	4,720	0	900	9,644	120	0	0	0	0	0	309	29,818	1,756	0	750	0	50,135	0	50,135
1050531	YYY	11,765	14,898	0	6,547	9,644	5,530	0	0	7,500	0	0	1,392	104,604	3,604	0	1,830	0	167,314	0	167,314
1050624	YYY	1,059	2,360	0	500	10,777	30	0	0	1,320	0	0	312	2,912	878	0	450	0	20,598	0	20,598
1050622	YYY	3,948	4,720	0	5,471	480	3,930	0	0	6,870	0	0	311	1,383	440	0	150	0	27,703	0	27,703
1050617	YYY	5,314	5,457	0	9,872	18,525	3,790	0	0	2,640	0	0	4,140	4,681	883	0	375	0	55,677	0	55,677
1050626	YYY	706	573	0	100	7,813	0	0	0	0	0	0	113	8,446	483	0	150	0	18,384	0	18,384
1050626	YYY	706	573	0	270	1,234	0	0	0	0	0	0	144	33,039	483	0	150	0	36,599	0	36,599
1050627	YYY	353	1,180	0	0	1,234	0	0	0	0	0	0	88	10,886	395	0	150	0	14,286	0	14,286
1050625	YYY	1,059	2,360	0	700	4,822	60	0	0	0	0	0	126	61,876	878	0	300	0	72,181	0	72,181
1050626	YYY	706	1,180	0	0	2,411	30	0	0	0	0	0	111	3,965	483	0	150	0	9,036	0	9,036
1050626	YYY	706	1,180	0	50	1,234	0	0	0	0	0	0	101	13,843	483	0	150	0	17,747	0	17,747
1050610	YYY	6,354	20,060	0	5,380	7,632	570	0	0	14,640	0	0	5,993	42,829	2,724	0	1,050	0	107,232	0	107,232
1050619	089	4,227	9,440	0	1,739	240	660	0	0	1,320	0	0	429	12,368	751	0	225	0	31,399	0	31,399
1050614		9,841	46,660	0	13,807	880	14,224	0	0	8,970	0	0	5,118	25,554	1,191	0	1,305	0	127,550	0	127,550
1050625	YYY	1,059	2,360	0	0	4,822	90	0	0	0	0	0	112	13,474	878	0	300	0	23,095	0	23,095
1050524	YYY	15,653	39,240	8,820	17,610	2,074	15,671	0	4,320	3,435	0	0	2,571	26,068	5,802	0	2,820	0	144,084	0	144,084
1050610	YYY	2,118	4,720	0	900	9,644	150	0	0	0	0	0	239	6,514	1,756	0	750	0	26,791	0	26,791
1050618	YYY	4,264	10,620	0	870	7,433	3,784	0	0	0	0	6,075	8,351	16,172	1,801	0	525	0	59,895	0	59,895
1050613	YYY	6,029	16,520	0	5,344	2,658	9,912	3,504	0	1,320	0	0	2,104	24,776	1,934	0	375	0	74,476	0	74,476
1050626	YYY	706	1,180	0	0	1,234	60	0	0	0	0	0	106	1,877	483	0	225	0	5,871	0	5,871
1050611	YYY	2,118	4,720	0	1,500	9,644	120	0	0	0	0	0	241	103,355	1,756	0	750	0	124,204	0	124,204
1050617	YYY	4,580	10,040	2,020	3,054	730	4,106	0	0	0	0	0	384	8,372	883	0	225	0	34,394	0	34,394
1050626	YYY	706	573	0	0	6,155	0	0	0	0	0	0	51	57	176	0	75	0	7,793	0	7,793
1050627	YYY	706	1,180	0	0	9,238	90	0	0	0	0	0	36	3,535	483	0	225	0	15,493	0	15,493
1050623	YYY	4,197	5,900	0	9,191	930	640	0	320	0	0	0	231	926	487	0	150	0	22,972	0	22,972
1050531	YYY	3,177	7,080	0	1,350	14,466	330	0	0	0	0	0	380	45,901	2,634	0	1,050	0	76,368	0	76,368
1050627	YYY	706	1,180	0	50	7,189	60	0	0	0	0	0	123	24,000	483	0	375	0	34,166	0	34,166
1050626	YYY	1,059	2,360	0	0	4,822	90	0	0	0	0	0	163	13,244	878	0	300	0	22,916	0	22,916
1050611	YYY	2,118	4,720	0	690	9,644	240	0	0	0	0	0	274	4,425	1,756	0	750	0	24,617	0	24,617
1050627	YYY	706	1,180	0	100	1,234	30	0	0	0	0	0	95	1,502	483	0	150	0	5,480	0	5,480
1050624		2,829	5,020	0	3,394	240	2,750	0	0	0	0	0	305	1,005	355	0	180	0	16,078	0	16,078
1050610	YYY	2,118	4,720	0	900	9,644	210	0	0	0	0	0	276	106,580	1,756	0	1,050	0	127,254	0	127,254
1050626	YYY	1,426	2,360	0	0	4,822	120	0	0	0	0	0	121	32,042	878	0	300	0	42,069	0	42,069
1050624	YYY	2,132	2,292	0	4,480	1,231	180	0	0	0	0	0	126	7,392	747	0	450	0	19,030	0	19,030
1050626	YYY	1,059	2,360	0	450	7,189	0	0	0	0	0	0	114	18,598	571	0	225	0	30,566	0	30,566
1050610	YYY	2,118	4,720	0	900	9,844	120	0	0	0	0	0	234	21,855	1,756	0	900	0	42,447	0	42,447
1050610	YYY	2,118	4,720	0	900	9,644	150	0	0	0	0	0	250	119,822	1,756	0	975	0	140,335	0	140,335
1050611	YYY	2,118	4,720	0	0	9,644	90	0	0	0	0	0	244	6,505	1,756	0	750	0	25,827	0	25,827
1050627	YYY	706	1,180	0	0	1,234	60	0	0	0	0	0	153	27,044	483	0	225	0	31,085	0	31,085
1050627	YYY	1,059	2,360	0	0	1,234	90	0	0	0	0	0	109	38,087	571	0	375	0	43,885	0	43,885
1050628	YYY	706	1,180	0	0	1,234	90	0	0	0	0	0	104	41,673	483	0	225	0	45,695	0	45,695
1050625	YYY	1,765	4,720	0	0	9,644	30	0	0	0	0	0	166	5,515	1,668	0	750	0	24,258	0	24,258
1050627	YYY	1,426	1,146	0	192	10,977	60	0	0	0	0	0	156	13,616	878	0	300	0	28,751	0	28,751
1050627	YYY	1,059	2,360	0	0	4,822	120	0	0	0	0	0	164	24,378	878	0	300	0	34,081	0	34,081
1050627	YYY	1,059	2,360	0	0	4,822	30	0	0	0	0	0	122	61,042	878	0	375	0	70,688	0	70,688
1050626	YYY	1,412	3,540	0	420	5,022	180	0	0	1,320	0	0	192	9,688	966	0	375	0	23,115	0	23,115
1050626	YYY	1,779	3,540	0	0	1,234	3,604	0	0	0	0	0	8,219	13,488	659	0	300	0	32,823	0	32,823
1050622	YYY	4,434	4,011	2,290	3,349	1,664	4,310	0	0	0	0	0	5,909	2,785	704	0	225	0	29,681	0	29,681
1050628	YYY	706	1,180	0	0	1,858	30	0	0	0	0	0	95	15,392	483	0	150	0	19,894	0	19,894
1050623		4,949	8,260	1,950	5,526	240	8,269	0	0	0	0	0	624	16,336	616	0	255	0	47,025	0	47,025
1050531	YYY	3,883	9,440	0	0	14,466	180	0	0	0	0	0	462	128,643	2,810	0	1,125	0	161,009	0	161,009
1050627	YYY	1,059	2,360	0	650	4,822	60	0	0	0	0	0	153	11,636	878	0	300	0	21,918	0	21,918
1050615	YYY	6,396	16,520	0	6,695	3,173	4,220	0	0	0	0	0	2,272	61,920	1,846	0	1,005	0	104,047	0	104,047
1050623	41601	3,587	4,140	0	7,686	240	4,696	0	0	16,500	0	0	6,043	8,075	487	0	855	0	52,309	0	52,309
1050621		4,608	9,440	0	3,133	4,800	2,145	0	320	0	0	0	325	2,171	751	1,031	150	0	28,874	0	28,874
1050625	YYY	2,499	4,720	0	2,481	8,500	25,403	0	0	0	0	0	4,808	425	440	0	150	0	49,426	0	49,426
1050601	YYY	3,177	7,080	0	1,350	14,666	240	0	0	0	0	0	363	161,150	2,634	0	1,350	0	192,010	0	192,010
1050531	089	12,256	32,160	3,850	19,284	8,134	26,335	0	0	0	0	0	3,020	24,465	3,052	0	750	0	133,306	0	133,306
1050624	320	3,182	4,720	0	4,030	240	655	0	0	1,320	0	0	438	6,134	487	0	150	0	21,356	0	21,356
1050628	YYY	1,059	2,360	0	200	1,234	90	0	0	0	0	0	103	11,658	571	0	225	0	17,500	0	17,500
1050610	YYY	8,514	23,600	2,040	9,856	6,555	11,917	14,393	320	2,115	0	6,075	1,258	2,771	2,038	0	480	0	91,932	0	91,932
1050628	YYY	1,059	2,360	0	200	4,822	90	0	0	0	0	0	159	24,570	878	0	450	0	34,588	0	34,588
1050602	YYY	12,892	33,040	0	59,656	13,584	10,385	10,066	0	11,610	0	8,715	10,451	70,318	3,049	0	855	0	244,621	0	244,621
1050626	YYY	1,765	4,720	0	0	7,233	180	0	0	0	0	0	153	5,626	1,361	0	750	0	21,788	0	21,788
1050628	YYY	1,059	2,360	0	450	1,858	60	0	0	0	0	0	37	19,214	571	0	225	0	25,834	0	25,834
1050621	08003	4,773	10,620	0	3,649	6,735	460	0	0	0	0	0	302	6,838	839	0	450	0	34,666	0	34,666
1050523	YYY	13,306	15,471	9,590	10,749	1,680	12,240	0	0	0	0	0	1,226	45,794	2,511	0	885	0	113,452	0	113,452
1050610	YYY	3,558	5,259	0	4,020	10,044	180	0	0	0	0	0	319	90,456	1,932	0	1,275	0	117,043	0	117,043
1050530		12,727	36,000	0	14,598	11,940	7,670	0	0	17,820	0	0	687	7,474	2,687	0	750	0	112,353	0	112,353
1050613	YYY	2,118	4,720	0	900	9,644	120	0	0	0	0	0	264	29,798	1,756	0	750	0	50,070	0	50,070
1050628	YYY	1,059	2,360	0	450	4,822	120	0	0	0	0	0	118	13,485	878	0	450	0	23,742	0	23,742
1050527	41601	3,182	5,020	0	9,985	4,800	360	0	0	0	0	0	224	1,036	487	0	150	0	25,244	2,524	22,720
1050505	47701	15,969	71,458	10,140	47,816	10,280	36,064	16,443	0	10,790	32,800	6,075	4,962	26,531	2,599	0	1,455	0	293,382	0	293,382
1050603	29601	1,568	2,360	0	3,794	480	150	0	0	0	0	0	74	135	135	0	225	0	8,921	0	8,921
1050601	29601	2,376	4,720	0	6,418	480	40	0	0	0	0	0	217	873	399	0	150	0	15,673	1,567	14,106
1050602	29401	2,023	3,540	0	3,671	480	180	0	0	0	0	0	265	1,169	352	0	225	0	11,905	1,191	10,714
1050603	277	2,302	2,660	0	2,698	672	152	0	0	0	0	0	146	6,725	311	0	150	0	15,816	1,582	14,234
1050530	29402	3,154	3,738	0	8,296	4,800	1,042	0	0	0	0	0	198	1,642	663	0	225	0	23,758	2,376	21,382
1050530	07903	4,608	8,560	0	4,887	200	570	0	0	0	0	0	667	5,111	751	0	555	0	25,909	2,591	23,318
1050531	320	4,255	7,080	0	13,024	240	707	0	0	0	0	0	258	2,227	663	0	225	0	28,679	0	28,679
1050523	41501	8,507	16,820	0	15,870	2,125	1,189	4,443	0	0	0	6,075	5,801	5,543	1,367	0	600	0	68,340	6,834	61,506
1050530	12701	4,961	9,740	3,120	9,934	840	8,348	0	0	0	0	0	1,099	4,952	839	0	825	0	44,658	0	44,658
1050604	29401	2,829	3,540	0	7,773	240	90	0	0	0	0	0	357	1,031	399	0	150	0	16,409	1,641	14,768
1050531	29601	3,507	8,260	0	13,087	680	3,732	0	0	0	0	0	591	3,422	751	0	375	0	34,405	3,441	30,964
1050608	29401	2,803	2,360	0	2,302	240	184	0	0	0	0	0	137	544	311	0	75	0	8,956	0	8,956
1050607	046	2,852	5,900	0	3,870	200	0	0	0	0	8,200	0	132	711	528	0	75	0	22,468	0	22,468
1050529	41601	7,446	8,049	0	13,513	10,955	7,728	0	0	0	0	0	1,002	4,365	1,323	0	375	0	54,756	5,476	49,280
1050610	320	1,742	1,446	0	4,798	480	810	0	0	0	0	0	235	368	311	0	375	0	10,565	1,057	9,508
1050609	24001	2,599	2,019	0	4,216	240	730	0	0	0	0	0	68	391	399	0	225	0	10,887	0	10,887
1050605	29501	4,608	8,560	0	12,492	240	568	0	0	0	0	0	806	8,978	751	0	1,155	0	38,158	3,816	34,342
1050606	30102	2,980	3,465	0	2,423	240	0	0	0	0	0	0	218	675	619	0	150	0	10,770	0	10,770
1050612	331	1,670	2,360	0	2,011	240	30	0	0	0	0	0	133	765	223	0	75	0	7,507	751	6,756
1050528	320	7,753	16,820	0	15,393	680	2,083	0	0	2,640	0	0	1,810	9,196	1,455	0	450	0	58,280	0	58,280
1050606	41601	4,608	8,560	0	11,757	2,685	990	0	0	0	0	0	346	3,327	663	0	225	0	33,161	3,316	29,845
1050609	29701	4,197	6,200	0	9,296	240	1,140	0	2,855	0	0	0	105	863	575	0	150	0	25,621	2,562	23,059
1050614		862	1,480	0	2,543	240	924	0	0	0	0	0	130	278	135	0	75	0	6,667	0	6,667
1050608	29401	3,849	8,260	0	4,252	240	690	0	0	0	0	0	726	2,637	704	0	825	0	22,183	0	22,183
1050603	41601	6,835	12,066	390	22,505	8,165	4,441	0	0	0	0	0	2,625	14,934	1,293	0	300	0	73,554	7,355	66,199
1050610	41601	3,874	8,560	0	7,237	240	30	0	0	0	0	0	470	4,628	751	0	225	0	26,015	2,602	23,413
1050614	30102	2,288	3,540	0	2,150	640	765	0	0	0	0	0	68	943	399	1,031	75	0	11,899	1,190	10,709
1050612	320	4,522	9,440	2,730	5,928	240	4,649	0	0	0	0	0	289	11,732	792	0	255	0	40,577	0	40,577
1050618	046	1,756	1,480	0	4,431	480	720	0	0	0	0	0	94	1,668	223	0	225	0	11,077	1,108	9,969
1050529	41501	13,026	47,568	5,850	24,629	4,480	16,380	14,393	0	5,280	0	6,075	3,612	23,734	2,024	0	930	0	167,981	16,798	151,183
1050617	24801	2,790	2,019	0	8,685	6,120	201	0	0	0	0	0	86	431	443	0	375	0	21,150	2,115	19,035
1050615	089	5,804	11,800	3,120	29,539	880	6,639	0	0	0	0	0	524	3,946	927	0	300	0	63,479	0	63,479
1050620	01501	2,994	5,900	0	7,987	12,140	153	0	0	0	0	0	165	1,575	487	0	150	0	31,551	3,155	28,396
1050621	29401	2,448	5,020	0	3,411	1,050	300	0	0	0	0	0	238	1,022	487	0	150	0	14,126	1,413	12,713
1050620	024	3,403	6,200	0	17,024	11,980	1,257	0	0	0	0	0	1,266	3,771	575	0	75	0	45,551	4,555	40,996
1050623	320	2,952	4,720	0	6,434	440	240	0	0	0	0	0	225	836	399	0	150	0	16,396	1,640	14,756
1050621	29701	2,801	6,200	0	6,161	480	235	0	0	0	0	0	153	513	575	0	225	0	17,343	1,734	15,609
1050623	278	3,096	5,900	0	4,386	240	1,434	0	0	0	0	0	366	3,071	528	0	105	0	19,126	0	19,126
1050624	31603	1,765	4,720	0	4,842	200	30	0	0	0	0	0	73	313	440	0	75	0	12,458	1,246	11,212
1050618	320	5,656	4,884	3,120	8,771	240	4,131	0	0	0	0	0	657	10,141	836	0	300	0	38,736	3,874	34,862
1050618	320	5,314	10,620	0	6,846	5,160	2,271	0	0	0	0	0	405	2,895	927	0	300	0	34,738	3,474	31,264
1050617	07903	6,034	11,800	390	22,466	4,640	8,089	0	320	1,320	0	0	4,835	9,681	1,015	1,031	510	0	72,131	7,213	64,918
1050623	065	2,952	2,292	0	9,423	11,300	720	0	0	0	0	0	153	634	487	0	75	0	28,036	2,804	25,232
1050617	29501	5,995	12,100	0	8,757	440	699	0	0	0	0	0	1,655	14,317	1,059	0	1,050	0	46,072	0	46,072
1050619	41601	5,314	9,740	0	7,246	680	405	0	0	0	0	0	575	9,854	883	0	450	0	35,147	3,515	31,632
1050625	320	2,641	4,720	0	6,012	1,260	270	0	0	0	0	0	1,235	1,883	399	0	150	0	18,570	1,857	16,713
1050528	41601	2,462	2,660	0	3,744	4,560	2,110	0	0	0	8,200	0	142	2,489	355	0	105	0	26,827	0	26,827
1050520	ZZZ	4,745	10,640	0	11,124	480	1,010	0	0	0	0	0	3,123	8,013	971	0	930	0	41,036	4,104	36,932
1050510	41601	9,550	24,780	0	22,902	9,442	7,750	0	0	0	0	0	10,701	17,620	1,983	0	600	0	105,328	10,533	94,795
1050517	41601	6,345	16,520	0	10,826	6,195	6,411	0	0	0	0	0	2,865	5,881	1,323	0	375	0	56,741	5,674	51,067
1050519	13002	5,706	7,449	0	13,284	12,570	3,265	0	0	2,640	0	0	2,672	4,659	1,191	0	405	0	53,841	0	53,841
1050526	069	3,816	7,080	0	2,284	200	30	0	0	0	0	0	160	8,040	616	0	225	0	22,451	0	22,451
1050523	320	3,686	8,860	2,290	3,518	240	6,371	0	0	0	0	0	510	4,904	751	0	225	0	31,355	3,136	28,219
1050528	39804	1,921	3,840	0	6,237	7,742	114	0	0	0	0	0	202	2,609	399	0	105	0	23,169	2,317	20,852
1050527	321	2,815	4,140	1,020	2,593	240	3,808	0	0	0	0	0	199	1,550	443	0	105	0	16,913	1,691	15,222
1050515	02002	6,684	19,180	0	12,244	16,750	0	0	0	0	0	0	477	41,520	1,455	0	375	0	98,685	9,869	88,816
1050518	07903	5,648	17,700	3,070	14,631	1,600	15,444	0	0	6,250	0	0	750	35,871	1,408	0	405	0	102,777	10,278	92,499
1050528	24901	2,274	4,140	0	1,588	672	0	0	0	0	0	0	178	15,664	443	0	150	0	25,109	2,511	22,598
1050501	47501	16,647	79,520	12,430	12,520	1,280	50,949	8,319	4,080	0	0	2,550	1,788	30,150	2,951	0	705	0	223,889	23,845	200,044
1050530	41601	1,765	2,292	0	2,470	200	150	0	0	0	0	0	208	1,067	352	0	150	0	8,654	0	8,654
1050529	41601	2,815	5,020	0	9,262	7,202	540	0	0	0	0	0	215	4,183	487	0	150	0	29,874	2,987	26,887
1050526	27201	4,731	9,440	2,730	4,233	240	4,734	0	0	0	0	0	384	3,885	751	0	75	0	31,203	3,120	28,083
1050527	185	3,969	7,380	0	3,872	7,202	150	0	0	0	0	0	374	2,739	663	0	255	0	26,604	2,660	23,944
1050522	271	6,020	6,057	0	7,129	690	2,105	0	0	0	0	0	413	6,173	1,015	0	180	0	29,782	2,978	26,804
1050524	089	4,213	5,457	3,070	4,565	440	11,663	0	0	0	0	0	486	3,975	927	0	300	0	35,096	0	35,096
1050528	182	4,825	27,960	0	9,356	7,442	2,705	0	0	0	0	0	2,435	8,841	616	0	525	0	64,705	0	64,705
1050526	24701	4,378	3,765	0	3,033	240	790	0	0	0	0	0	371	3,832	663	0	180	0	17,252	0	17,252
1050531	090	1,823	2,360	0	5,213	440	150	0	0	0	0	0	90	4,449	311	0	150	0	14,986	1,499	13,487
1050527	183	3,507	7,680	1,020	4,088	240	1,155	0	0	0	0	0	242	688	663	0	75	0	19,358	1,936	17,422
1050508	47501	18,449	131,040	10,530	27,537	1,440	48,552	0	2,720	0	0	0	4,058	10,235	2,464	0	555	0	257,580	25,758	231,822
1050531	321	2,095	3,840	0	4,748	1,296	0	0	0	0	0	0	130	953	399	0	225	0	13,686	1,369	12,317
1050519	07901	1,119	7,144	0	650	200	870	0	0	0	0	0	0	960	264	0	0	0	11,207	0	11,207
1050527	278	3,333	7,680	0	2,238	672	30	0	0	0	0	0	383	16,323	575	0	225	0	31,459	3,146	28,313
1050523	277	6,006	13,280	0	7,138	6,885	3,347	0	0	0	0	0	426	28,681	1,059	0	375	0	67,197	6,720	60,477
1050510	41601	10,595	29,500	1,950	19,204	7,802	12,016	0	0	0	0	0	4,897	29,029	2,335	1,031	675	0	119,034	11,903	107,131
1050524	278	5,112	6,603	0	16,933	240	0	0	0	0	0	0	379	11,931	1,103	0	300	0	42,601	0	42,601
1050505	46801	11,763	33,940	0	10,087	13,060	27,891	0	0	2,640	0	0	5,423	67,027	2,643	0	855	0	175,329	0	175,329
1050531	277	2,815	4,720	0	5,329	240	1,754	0	0	0	0	0	270	3,160	440	0	180	0	18,908	1,891	17,017
1050603	090	1,742	2,360	0	5,496	440	120	0	0	0	0	0	149	640	264	0	75	0	11,286	1,129	10,157
1050601	04402	2,641	4,720	0	2,236	440	212	0	0	0	0	0	198	2,950	399	0	105	0	13,901	1,390	12,511
1050530	321	3,361	2,892	0	4,936	1,685	0	0	0	0	0	0	367	1,627	443	0	150	0	15,461	1,546	13,915
1050513	46801	10,623	26,533	0	13,850	7,442	12,582	11,076	0	27,400	0	6,075	1,823	22,555	2,112	0	600	0	142,671	0	142,671
1050531	207	2,790	5,020	0	5,267	7,442	164	0	0	0	0	0	329	3,170	487	0	150	0	24,819	2,482	22,337
1050525	14401	5,628	5,211	0	3,834	240	5,438	2,081	0	0	20,500	0	1,820	2,440	927	0	300	0	48,419	4,842	43,577
1050602	277	2,757	3,840	0	1,528	840	284	0	0	0	0	0	198	1,835	399	0	180	0	11,861	1,186	10,675
1050601	41602	3,096	5,900	0	4,410	690	70	0	0	0	0	0	205	3,211	528	0	180	0	18,290	1,829	16,461
1050603	244	1,742	2,660	0	2,541	240	0	0	0	0	0	0	186	1,347	311	0	150	0	9,177	918	8,259
1050601	321	3,305	5,900	0	4,084	4,800	2,546	0	0	0	0	0	219	1,292	528	0	150	0	22,824	2,282	20,542
1050508	48301	18,850	125,206	8,720	25,121	8,775	45,608	0	1,200	0	0	5,955	2,817	37,181	2,555	0	2,250	0	284,238	28,424	255,814
1050517	41601	13,760	74,920	8,830	26,329	10,240	29,953	0	0	5,940	0	0	4,464	31,890	1,807	0	1,380	0	209,513	20,951	188,562
1050602	41601	2,790	4,720	1,170	5,773	200	4,184	0	0	0	0	0	377	1,577	487	0	150	0	21,428	2,143	19,285
1050530	277	3,911	9,440	0	16,121	13,450	1,020	0	0	0	0	0	2,280	2,758	792	0	225	0	49,997	5,000	44,997
1050601	277	3,249	5,900	0	3,247	240	28	0	0	4,620	0	0	1,719	4,305	487	0	255	0	24,050	0	24,050
1050526	278	5,581	6,603	0	4,102	440	581	0	0	0	0	0	588	15,849	1,103	0	405	0	35,252	3,525	31,727
1050418	46801	29,003	193,840	15,990	59,782	9,995	65,066	7,606	5,120	5,280	0	0	12,496	83,109	4,447	0	3,630	0	495,364	0	495,364
1050603	278	2,641	4,720	0	2,138	1,554	300	0	0	0	0	0	261	2,554	440	0	180	0	14,788	1,479	13,309
1050523	263	6,712	16,820	0	10,025	11,740	8,601	0	0	0	0	0	697	9,141	1,367	0	480	0	65,583	6,558	59,025
1050529	05302	5,328	9,740	0	8,800	10,755	664	27,182	0	0	0	7,395	493	13,264	751	0	225	0	84,597	8,460	76,137
1050531	42303	3,154	7,080	0	6,924	240	420	0	0	0	0	0	239	5,564	663	0	225	0	24,509	2,451	22,058
1050605	39804	1,215	1,180	0	2,793	240	30	0	0	0	0	0	84	1,088	223	0	105	0	6,958	696	6,262
1050601	278	2,938	5,900	0	3,436	240	448	0	0	0	0	0	323	2,197	575	0	255	0	16,312	1,631	14,681
1050531	XXX	3,521	7,080	0	9,636	6,195	3,060	0	0	0	0	0	163	418	663	1,031	150	0	31,917	3,192	28,725
1050527	269	5,275	4,911	0	10,886	4,800	5,265	0	0	0	0	0	473	4,994	748	0	405	0	37,757	3,776	33,981
1050530	277	3,333	3,738	0	4,473	1,056	1,108	0	0	0	0	0	380	4,241	707	0	225	0	19,261	1,926	17,335
1050605	089	1,568	2,360	0	1,828	440	510	0	0	0	0	0	90	3,401	264	0	75	0	10,536	1,054	9,482
1050530	277	3,333	8,560	0	2,892	672	450	0	0	0	0	0	448	19,410	751	0	255	0	36,771	3,677	33,094
1050522	263	6,891	16,820	0	6,713	480	5,244	0	0	0	0	0	707	8,394	1,411	0	480	0	47,140	4,714	42,426
1050524	320	6,185	7,749	0	9,638	6,435	1,050	0	0	0	0	0	247	3,559	1,279	0	225	0	36,367	3,637	32,730
1050603	089	2,274	5,020	0	3,880	680	150	0	0	0	0	0	201	1,834	487	0	150	0	14,676	1,468	13,208
1050603	41601	3,263	3,840	0	2,443	240	0	0	0	0	0	0	247	1,032	443	0	150	0	11,658	0	11,658
1050525	18805	6,345	16,520	0	6,966	7,635	3,366	0	0	1,320	0	0	6,647	10,908	1,320	0	405	0	61,432	0	61,432
1050520	01405	9,492	9,768	0	13,311	12,600	11,100	0	0	1,320	0	0	1,004	7,698	1,631	0	480	0	68,404	0	68,404
1050523	206	6,524	17,120	0	9,681	6,735	2,786	0	0	0	0	0	2,960	12,327	1,411	0	375	0	59,919	5,992	53,927
1050529	41601	8,431	37,900	0	12,994	19,782	6,180	0	880	0	0	0	2,473	12,411	968	0	1,155	0	103,174	10,317	92,857
1050601	41601	3,291	3,738	1,900	5,486	7,442	2,485	0	0	0	0	0	404	4,397	663	0	225	0	30,031	3,003	27,028
1050524	28302	5,668	13,415	0	2,877	5,955	1,401	0	0	0	0	0	389	14,888	1,408	0	375	0	46,376	4,638	41,738
1050605	41803	1,823	2,660	0	1,528	240	0	0	0	0	0	0	195	2,037	311	0	180	0	8,974	897	8,077
1050528	41601	4,933	10,340	0	11,068	4,480	5,918	0	0	0	0	0	551	8,066	927	0	405	0	46,688	4,669	42,019
1050519	18805	7,880	10,914	0	17,259	7,442	298	0	0	0	0	0	913	13,771	1,763	0	1,455	0	61,695	6,170	55,525
1050530	41501	4,227	4,611	0	4,411	440	90	14,166	0	0	0	6,075	2,806	6,155	795	0	300	0	44,076	4,408	39,668
1050524	47501	8,536	49,020	4,000	9,987	800	15,995	0	0	1,320	0	0	768	37,925	1,408	1,031	375	0	131,165	13,117	118,048
1050606	09602	3,157	4,720	0	4,480	640	340	0	0	0	8,200	0	125	3,368	440	0	150	0	25,620	0	25,620
1050530	271	4,603	6,303	0	3,570	0	1,019	0	0	0	0	0	166	1,815	1,056	0	75	0	18,607	1,861	16,746
1050603	321	3,521	6,500	0	8,486	5,040	1,410	0	0	0	0	0	284	1,235	619	1,031	150	0	28,276	2,828	25,448
1050604	046	3,728	6,200	0	3,174	240	714	0	0	0	12,300	0	328	8,804	575	0	150	0	36,213	0	36,213
1050606	320	1,921	3,840	0	4,303	240	180	0	0	0	0	0	262	408	311	0	150	0	11,615	1,162	10,453
1050601	41601	6,802	31,500	2,730	21,674	5,440	7,586	0	3,120	0	0	0	3,072	6,957	880	0	330	0	90,091	9,009	81,082
1050523	41601	7,771	19,180	3,510	13,152	880	7,844	0	0	0	0	0	2,264	37,947	1,587	1,031	2,325	0	97,491	0	97,491
1050604	41601	3,168	5,020	0	6,492	7,202	2,650	0	0	0	0	0	194	1,438	531	0	75	0	26,770	2,677	24,093
1050604	278	2,627	5,900	0	2,507	240	84	0	0	0	0	0	269	21,146	575	0	150	0	33,498	3,350	30,148
1050510	126	18,341	107,232	3,900	42,845	12,580	16,044	0	0	0	0	0	4,816	30,701	2,816	0	1,605	0	240,880	0	231,800
1050608	09702	1,670	2,360	0	3,156	240	0	0	0	0	0	0	56	3,151	223	0	75	0	10,931	1,093	9,838
1050522	07903	8,491	10,341	5,440	7,703	880	23,856	0	0	0	0	0	689	4,095	1,540	0	255	0	63,290	6,329	56,961
1050604	29402	2,994	6,200	0	4,009	672	586	0	0	0	0	0	462	6,064	575	0	225	0	21,787	2,179	19,608
1050602	277	3,788	9,440	0	3,103	450	619	0	0	0	0	0	418	12,534	792	0	255	0	31,399	3,140	28,259
1050607	278	1,412	3,540	0	942	360	0	0	0	0	0	0	102	820	264	0	75	0	7,515	752	6,763
1050528	182	5,098	6,630	3,400	6,081	7,442	9,002	0	0	0	0	0	598	7,284	1,015	0	300	0	46,850	4,685	42,165
1050601	47501	7,669	36,720	0	17,105	1,580	15,677	0	0	1,320	0	0	3,004	8,841	880	0	630	0	93,426	9,343	84,083
1050606	321	1,765	4,720	0	2,482	200	60	0	0	0	0	0	198	8,571	440	0	150	0	18,586	1,859	16,727
1050607	41601	1,921	3,540	0	3,556	240	120	0	0	0	0	0	228	1,218	399	0	150	0	11,372	1,137	10,235
1050604	41601	3,154	3,738	0	5,716	240	546	0	0	0	0	0	193	8,627	663	0	75	0	22,952	2,295	20,657
1050608	320	1,412	1,719	0	7,294	240	154	0	0	0	0	0	158	1,074	311	0	180	0	12,542	1,254	11,288
1050518	47501	13,456	70,080	4,680	34,285	2,200	32,316	0	0	1,320	0	0	2,228	38,073	2,200	0	1,260	0	202,098	20,210	181,888
1050604	278	3,521	7,380	0	3,596	1,056	60	0	0	0	0	0	310	4,786	663	0	255	0	21,627	0	21,627
1050602	41601	4,731	9,740	0	12,396	4,800	70	0	880	0	0	0	408	18,636	839	0	300	0	52,800	5,280	47,520
1050603	068	4,241	7,680	0	3,778	240	330	0	0	0	12,300	0	223	2,270	707	0	180	0	31,949	0	31,949
1050607	278	2,095	3,540	0	2,666	240	0	0	0	0	0	0	178	3,030	399	0	180	0	12,328	1,233	11,095
1050531	47501	6,963	38,200	3,510	33,602	1,520	14,071	0	0	1,320	0	0	683	10,280	1,015	0	555	0	111,719	11,172	100,547
1050606	320	2,448	5,020	0	3,732	240	400	0	0	0	0	0	238	4,652	487	0	150	0	17,367	0	17,367
1050506	47803	17,021	67,700	0	30,011	25,922	25,508	0	320	1,320	0	2,550	37,339	22,171	3,215	0	1,905	0	234,982	25,500	209,482
1050601	18805	4,494	5,757	0	4,426	480	810	0	0	0	0	0	328	11,867	971	0	150	0	29,283	0	29,283
1050602	445	4,703	11,800	0	6,389	1,962	373	0	0	1,320	0	0	362	8,052	968	0	330	0	36,259	3,626	32,633
1050606	205	4,950	8,260	0	10,692	6,722	2,979	0	0	0	0	0	408	4,115	663	0	375	0	39,164	3,916	35,248
1050528	41601	7,300	17,120	5,070	19,129	1,320	12,877	0	0	1,320	0	0	3,283	18,049	1,411	0	630	0	87,509	8,751	78,758
1050608	321	3,672	5,900	0	5,609	600	449	0	0	0	0	0	210	1,486	487	0	150	0	18,563	1,856	16,707
1050607	41602	3,361	5,900	0	2,397	840	530	0	0	0	0	0	204	4,337	575	0	180	0	18,324	1,832	16,492
1050530	24801	7,093	14,460	0	8,239	672	3,102	0	0	0	0	0	766	7,111	1,235	0	405	0	43,083	4,308	38,775
1050610	278	2,274	4,720	0	6,983	440	240	0	0	0	0	0	262	4,997	440	0	150	0	20,506	2,051	18,455
1050603	321	4,566	11,220	0	7,158	240	5,613	0	0	0	0	0	437	4,564	971	1,031	900	0	36,700	3,670	33,030
1050608	068	3,521	7,080	0	4,844	6,195	0	0	0	0	0	0	335	3,925	616	1,031	180	0	27,727	2,773	24,954
1050603	21703	5,112	12,980	0	5,151	672	5,040	7,708	0	0	20,500	12,150	754	6,298	1,056	0	330	0	77,751	0	77,751
1050608	41601	4,368	22,740	0	17,198	5,240	3,623	0	0	0	0	0	2,880	7,617	616	0	780	0	65,062	6,506	58,556
1050609	278	2,743	4,720	0	2,493	600	362	0	0	0	0	0	182	5,182	487	0	180	0	16,949	1,695	15,254
1050608	183	3,082	7,080	0	3,725	480	236	0	0	0	0	0	197	3,481	575	0	225	0	19,081	1,908	17,173
1050608	35002	3,816	7,080	0	5,246	240	554	0	0	0	0	0	224	5,719	575	0	225	0	23,679	2,368	21,311
1050608	320	3,644	8,260	0	2,598	240	584	0	0	0	0	0	433	7,303	704	0	225	0	23,991	2,399	21,592
1050613	183	1,823	2,360	0	2,821	480	180	0	0	0	0	0	122	2,619	264	0	75	0	10,744	1,074	9,670
1050611	41602	2,288	3,540	0	5,018	4,800	30	0	0	0	0	0	205	1,872	399	0	180	0	18,332	1,833	16,499
1050612	24301	2,599	3,540	0	2,921	780	0	0	0	0	0	0	209	1,076	352	0	105	0	11,582	0	11,582
1050524	320	9,550	25,080	7,800	15,510	880	12,532	0	0	1,320	0	0	795	9,414	1,983	0	600	0	85,464	8,546	76,918
1050525	41601	10,551	24,780	7,020	9,089	5,200	15,636	0	0	2,115	0	0	930	13,597	1,895	0	405	0	91,218	9,122	82,096
1050610	320	2,448	4,720	0	5,073	12,202	678	0	0	0	0	0	313	4,720	399	0	150	0	30,703	3,070	27,633
1050604	07903	6,231	28,640	2,970	15,547	880	6,321	0	0	0	0	0	3,259	22,023	1,056	0	1,080	0	88,007	8,801	79,206
1050603	264	5,639	13,553	0	7,807	240	2,758	15,767	0	0	0	5,100	1,136	14,473	1,103	0	405	0	67,981	6,798	61,183
1050530	277	6,877	18,880	0	15,185	13,002	9,385	0	0	0	0	0	2,751	34,976	1,455	0	450	0	102,961	10,296	92,665
1050530	29601	8,141	12,237	0	8,623	6,795	1,114	0	0	0	0	0	440	5,150	1,408	0	480	0	44,388	4,439	39,949
1050525	205	8,805	10,914	0	13,700	11,762	7,320	0	0	0	0	0	4,754	8,838	1,763	0	600	0	68,456	6,846	61,610
1050606	321	4,961	8,860	0	8,858	760	449	0	0	0	0	0	465	8,471	795	0	300	0	33,919	3,392	30,527
1050611	180	2,274	4,720	0	6,175	7,642	5,763	0	0	0	0	0	277	1,520	440	0	150	0	28,961	2,896	26,065
1050608	277	3,700	4,011	0	4,492	240	1,913	0	0	0	0	0	352	4,275	704	0	255	0	19,942	0	19,942
1050513	YYY	15,300	18,063	6,330	20,075	7,402	32,366	14,812	0	0	0	6,075	1,474	45,623	2,907	0	825	0	171,252	0	171,252
1050610	277	2,641	2,592	0	4,889	240	840	0	0	0	0	0	240	1,298	487	0	150	0	13,377	1,338	12,039
1050607	41601	4,241	4,311	0	6,152	1,160	454	0	0	0	16,400	0	279	2,701	751	0	180	0	36,629	0	36,629
1050605	277	4,448	5,184	0	11,670	240	1,812	0	0	0	0	0	424	7,085	883	0	300	0	32,046	3,205	28,841
1050609	30102	3,143	2,592	0	8,748	480	30	0	0	0	0	0	188	902	531	0	150	0	16,764	1,676	15,088
1050610	069	3,008	4,720	0	2,863	7,202	30	0	0	0	0	0	199	3,286	487	0	150	0	21,945	2,195	19,750
1050611	278	2,627	5,900	0	1,782	600	450	0	0	0	0	0	257	2,536	487	0	255	0	14,894	1,489	13,405
1050608	205	4,594	9,440	0	3,936	13,397	340	0	0	0	0	0	225	7,643	792	0	225	0	40,592	4,059	36,533
1050501	47803	18,756	45,509	3,850	36,642	42,360	23,748	0	0	11,260	82,000	0	150,740	24,666	4,095	0	1,050	0	444,676	0	444,676
1050610	41601	4,241	8,260	0	4,853	7,442	40	0	0	0	0	0	382	7,008	704	0	225	0	33,155	3,316	29,839
1050610	41601	4,889	6,200	1,560	4,989	240	9,503	0	0	0	0	0	422	4,748	619	0	180	0	33,350	3,335	30,015
1050615	36802	1,684	1,180	0	4,038	480	450	0	0	0	0	0	175	3,238	223	0	75	0	11,543	1,154	10,389
1050529	47501	11,323	63,000	5,850	21,209	1,680	29,252	0	0	0	0	0	1,185	27,119	1,719	0	1,155	0	163,492	0	163,492
1050614	277	1,935	2,660	0	3,946	240	210	0	0	0	0	0	275	2,109	311	0	150	0	11,836	1,184	10,652
1050615	089	2,528	1,146	0	8,239	1,256	3,512	0	0	1,320	0	0	771	4,396	264	0	75	0	23,507	2,351	21,156
1050606	320	4,908	6,030	0	6,994	7,202	510	0	0	0	0	0	414	25,914	971	0	300	0	53,243	5,324	47,919
1050520	277	11,705	33,040	0	3,989	400	2,930	0	0	0	0	0	882	92,090	2,552	0	675	0	148,263	14,826	133,437
1050606	41601	4,933	12,100	0	7,180	5,880	5,949	0	0	0	0	0	2,228	6,661	1,015	0	480	0	46,426	4,643	41,783
1050610	47701	4,255	3,465	0	8,345	7,442	3,228	13,596	0	0	0	2,550	2,753	10,585	619	0	255	0	57,093	5,709	51,384
1050616	321	1,317	1,180	0	3,275	1,370	30	0	0	0	0	0	161	1,073	223	0	75	0	8,704	870	7,834
1050617	205	1,470	1,180	0	3,059	240	0	0	0	0	0	0	102	1,517	176	0	75	0	7,819	782	7,037
1050616	24202	1,879	2,360	0	3,256	672	150	0	0	0	0	0	149	1,582	264	0	105	0	10,417	1,042	9,375
1050611	09602	4,584	23,920	0	18,920	440	1,515	0	0	1,320	0	0	522	11,011	704	0	405	0	63,341	6,334	57,007
1050606	07903	6,255	6,030	3,900	11,451	640	14,240	0	1,520	795	16,400	0	656	5,811	1,012	0	300	0	69,010	0	69,010
1050420	42303	23,698	65,337	0	31,221	17,060	2,070	0	6,840	0	0	0	2,114	93,927	5,280	0	7,500	0	255,047	36,067	218,980
1050610	090	3,507	4,011	0	7,637	440	1,020	0	0	0	0	0	347	3,840	704	0	255	0	21,761	2,176	19,585
1050612	320	3,291	7,380	2,040	4,248	440	3,894	0	0	0	0	0	178	2,908	619	0	225	0	25,223	0	25,223
1050616	321	2,023	3,540	0	2,975	240	510	0	0	0	0	0	180	892	352	0	150	0	10,862	1,086	9,776
1050610	07903	5,289	5,157	2,970	4,003	440	10,137	0	0	0	0	0	408	13,280	839	0	255	0	42,778	4,278	38,500
1050601	ZZZ	6,707	21,240	0	4,155	400	4,340	11,308	0	0	0	6,075	2,896	34,455	1,672	0	480	0	93,728	9,373	84,355
1050612	321	4,378	8,260	0	5,526	240	2,100	0	0	1,320	0	0	229	1,922	704	0	75	0	24,754	2,475	22,279
1050608	47501	7,859	44,300	3,510	15,467	1,280	17,913	0	1,280	0	0	0	2,721	21,666	1,056	0	780	0	117,832	11,783	106,049
1050613	41601	2,801	6,200	0	8,159	6,282	90	0	0	0	0	0	542	4,196	575	0	150	0	28,995	2,900	26,095
1050615	321	2,376	4,720	0	3,630	240	492	0	0	0	0	0	352	2,646	440	0	150	0	15,046	1,505	13,541
1050610	089	5,738	26,280	0	17,586	1,240	3,220	0	0	0	0	0	528	41,620	880	0	525	0	97,617	9,762	87,855
1050616	278	2,023	3,540	0	2,133	240	270	0	0	0	0	0	272	2,439	352	0	180	0	11,449	1,145	10,304
1050615	41601	2,952	4,720	0	3,896	480	180	0	0	0	0	0	251	861	440	0	150	0	13,930	0	13,930
1050612	41601	3,573	7,380	0	7,538	440	11,058	0	0	0	0	0	462	12,323	663	0	255	0	43,692	4,369	39,323
1050521	12001	11,654	32,460	0	18,324	13,002	8,560	6,952	0	0	0	5,100	3,233	12,524	2,555	0	780	0	115,144	11,514	103,630
1050616	46802	2,952	4,720	0	8,976	240	863	5,026	0	0	0	0	1,005	1,491	440	0	150	0	25,863	2,586	23,277
1050605	41601	8,140	42,920	0	20,982	10,040	9,227	0	0	0	0	0	5,306	15,956	1,981	0	1,260	0	115,812	11,581	104,231
1050528	277	9,404	25,380	7,140	8,752	600	16,254	0	320	0	0	0	2,646	20,154	2,027	0	300	0	92,977	9,298	83,679
1050609	08002	5,070	5,457	1,020	12,875	8,382	6,730	0	0	0	0	0	1,320	9,655	971	0	330	0	51,810	5,181	46,629
1050612	278	4,889	9,440	0	3,559	672	3,626	0	0	0	0	0	319	4,359	751	0	225	0	27,840	2,784	25,056
1050614	278	3,361	6,200	0	1,878	240	1,755	0	0	0	0	0	305	6,912	575	0	150	0	21,376	2,138	19,238
1050612	320	3,788	4,884	0	2,753	240	975	0	0	0	0	0	539	7,396	839	0	225	0	21,639	0	21,639
1050615	07903	3,573	7,080	340	5,728	240	9,745	0	0	0	0	0	242	2,946	487	0	180	0	30,561	3,056	27,505
1050605	41601	7,667	14,358	0	20,101	7,802	7,305	0	0	5,670	0	0	4,303	22,754	1,455	0	480	0	91,895	0	91,895
1050616	090	3,305	5,900	1,560	5,823	240	6,043	0	0	0	0	0	259	1,675	487	0	180	0	25,472	2,547	22,925
1050616	420	3,510	5,900	0	6,975	240	0	0	0	0	0	0	232	1,360	528	0	150	0	18,895	1,890	17,005
1050608	089	6,287	9,270	1,460	15,847	1,480	5,514	0	0	1,320	0	0	616	8,955	1,191	0	375	0	52,315	5,232	47,083
1050509	07903	22,717	100,390	10,720	29,201	1,640	37,332	0	0	3,690	0	0	2,051	49,274	3,872	0	1,680	0	262,567	28,254	234,313
1050614	089	3,154	7,080	2,340	9,515	680	3,177	0	0	0	0	0	326	2,460	619	0	255	0	29,606	2,961	26,645
1050621	464	1,756	1,180	0	5,218	240	60	0	0	0	0	0	48	1,641	176	0	75	0	10,394	1,039	9,355
1050616	XXX	4,025	7,080	0	5,241	4,472	4,085	0	0	0	0	0	218	5,036	616	0	225	0	30,998	0	30,998
1050611	068	7,282	33,860	1,950	9,884	8,142	11,773	0	0	0	0	0	2,768	10,705	1,056	0	330	0	87,750	8,775	78,975
1050615	41601	3,435	8,260	0	3,423	240	364	0	0	0	0	0	362	4,836	663	0	225	0	21,808	0	21,808
1050621	WWW	1,389	1,180	0	6,469	240	0	0	0	0	0	0	125	979	176	0	75	0	10,633	0	10,633
1050610		7,887	14,160	4,240	9,702	1,072	15,101	0	0	0	0	0	632	13,085	1,103	0	360	0	67,342	6,734	60,608
1050526	47501	13,606	60,240	8,040	24,701	6,040	23,559	0	0	0	0	0	3,590	41,836	2,288	0	1,425	0	185,325	0	185,325
1050524	277	11,287	33,340	0	4,767	7,442	570	0	0	1,320	0	0	1,977	37,482	2,599	0	750	0	101,534	0	101,534
1050615	41601	3,802	8,260	0	7,952	480	2,260	0	0	4,620	0	0	379	4,098	704	0	225	0	32,780	3,278	29,502
1050611	WWW	4,392	10,620	0	15,481	640	910	0	0	0	0	0	829	7,065	927	0	300	0	41,164	0	41,164
1050601	47501	11,823	69,757	6,970	20,590	840	30,317	0	0	1,320	0	0	3,935	19,181	1,807	0	855	0	167,395	16,740	150,655
1050618	046	3,008	4,720	0	3,136	440	30	0	0	0	0	0	208	9,375	399	0	150	0	21,466	2,147	19,319
1050617	320	3,182	5,020	0	3,732	25,345	180	0	1,800	0	0	0	310	2,238	487	0	150	0	42,444	0	42,444
1050610	321	5,286	12,100	1,020	5,087	240	4,319	0	0	0	0	0	718	15,689	1,015	0	300	0	45,774	4,577	41,197
1050424	182	23,566	69,620	0	44,239	2,180	14,105	0	0	3,960	0	0	21,701	132,685	22,472	0	15,090	0	349,618	0	349,618
1050514	07903	5,660	25,780	13,130	3,343	400	13,719	0	1,840	0	0	0	898	53,852	1,232	0	450	0	120,304	0	120,304
1050610	01406	5,479	6,303	3,060	15,004	13,140	4,009	0	4,160	0	0	0	340	8,049	1,103	0	300	0	60,947	0	60,947
1050620	39706	1,921	2,019	0	5,209	240	525	0	0	0	0	0	205	5,959	399	0	150	0	16,627	1,663	14,964
1050619	277	2,274	4,720	0	1,998	672	1,033	0	0	0	0	0	232	1,414	487	0	180	0	13,010	0	13,010
1050521	41501	19,759	118,420	5,460	27,298	1,672	39,247	15,767	0	10,060	0	24,060	5,695	54,608	3,080	0	2,700	0	327,826	33,198	294,628
1050605	41601	10,950	50,200	0	21,460	2,120	15,727	0	0	2,640	0	0	3,222	16,728	1,584	0	885	0	125,516	0	125,516
1050619	17404	2,485	5,900	0	3,063	200	0	0	0	1,320	0	0	172	1,573	528	0	150	0	15,391	1,539	13,852
1050616	07903	5,288	9,440	3,070	5,500	440	7,234	0	0	0	0	0	515	2,088	792	0	300	0	34,667	0	34,667
1050515	07903	15,537	28,110	15,160	21,925	7,595	40,912	9,389	0	1,320	0	2,550	4,065	54,326	3,567	0	930	0	205,386	0	205,386
1050613	11301	5,337	6,303	0	11,261	600	2,572	9,267	0	1,320	20,500	6,075	574	8,662	1,056	0	300	0	73,827	0	73,827
1050618	089	2,627	5,020	0	4,598	680	1,630	0	0	0	0	0	264	4,230	487	0	450	0	19,986	1,999	17,987
1050620	278	2,176	3,540	0	2,424	672	197	0	0	0	0	0	176	5,943	399	0	105	0	15,632	0	15,632
1050621	07302	2,451	2,360	0	1,426	240	60	0	0	0	0	0	161	2,141	264	0	105	0	9,208	921	8,287
1050618	278	2,627	5,900	0	1,901	240	28	0	0	0	0	0	546	5,778	531	0	255	0	17,806	1,781	16,025
1050611	21704	5,832	14,160	0	5,167	6,714	5,051	7,708	0	0	0	8,625	571	38,429	1,191	0	405	0	93,853	9,385	84,468
1050619	277	2,529	4,720	0	1,528	672	282	0	0	0	0	0	237	2,097	487	0	180	0	12,732	1,273	11,459
1050615	07902	5,070	11,800	0	4,814	4,680	1,914	0	0	0	0	0	441	5,621	927	0	300	0	35,567	3,557	32,010
1050621	321	2,274	4,720	0	3,245	240	270	0	0	0	0	0	276	429	440	0	150	0	12,044	1,204	10,840
1050603	07903	9,903	16,248	8,190	18,682	8,442	24,665	0	0	0	0	0	4,663	30,649	2,024	0	480	0	123,946	12,395	111,551
1050619	277	3,728	5,020	0	7,610	440	450	0	0	0	0	0	284	3,310	487	0	180	0	21,509	2,151	19,358
1050613	28701	5,832	13,553	0	8,880	672	6,877	7,708	0	1,320	0	6,075	917	7,125	1,144	0	525	0	60,628	6,063	54,565
1050620	321	2,274	4,720	0	5,682	6,195	270	0	0	0	0	0	249	1,163	487	0	150	0	21,190	2,119	19,071
1050618	04401	4,230	6,200	0	3,281	240	154	0	0	0	0	0	320	12,979	575	0	255	0	28,234	2,823	25,411
1050622	09602	2,023	3,540	0	3,740	480	60	0	0	0	0	0	134	4,113	311	0	75	0	14,476	1,448	13,028
1050617	089	4,420	9,440	0	15,053	6,795	3,510	0	0	0	0	0	386	11,247	792	0	255	0	51,898	5,190	46,708
1050605	41601	8,110	16,650	0	12,684	6,195	3,215	0	0	0	0	0	2,268	15,267	1,807	0	525	0	66,721	6,672	60,049
1050620	277	3,008	5,020	0	1,991	1,380	1,040	0	0	0	0	0	245	3,265	443	0	180	0	16,572	1,657	14,915
1050612	41501	5,920	15,340	0	8,776	240	6,703	7,708	0	0	0	12,150	409	9,618	1,232	0	405	0	68,501	6,850	61,651
1050619	321	2,882	2,865	0	3,125	240	240	0	0	0	0	0	431	1,003	531	0	225	0	11,542	1,154	10,388
1050426	46801	13,426	51,740	390	11,606	200	10,013	10,360	0	1,320	0	7,395	1,871	115,125	3,168	0	1,125	0	227,739	0	227,739
1050617	41501	4,689	7,380	0	8,478	7,202	450	0	0	0	0	0	264	1,448	707	0	225	0	30,843	3,084	27,759
1050621	41601	683	5,900	0	3,982	680	3,240	0	0	0	0	0	264	2,994	528	0	150	0	18,421	1,842	16,579
1050617	41601	5,140	10,620	0	8,619	7,642	1,890	0	0	0	0	0	587	6,906	880	0	300	0	42,584	4,258	38,326
1050621	205	2,274	2,592	0	5,884	480	120	0	0	0	0	0	309	1,265	487	0	150	0	13,561	1,356	12,205
1050622	321	3,463	5,900	0	3,060	240	150	0	0	0	0	0	253	5,596	487	0	150	0	19,299	1,930	17,369
1050623	07301	2,910	3,540	0	2,318	6,435	30	0	0	0	0	0	314	3,161	399	0	150	0	19,257	1,926	17,331
1050610	41602	7,418	9,468	0	23,719	6,555	4,180	0	0	0	0	0	492	10,590	1,733	1,031	450	0	65,636	6,564	59,072
1050623	32302	2,529	4,720	0	3,483	480	220	0	0	0	0	0	276	3,179	399	0	150	0	15,436	0	15,436
1050623	321	3,110	4,720	0	3,483	6,995	90	0	0	0	0	0	205	1,549	399	0	150	0	20,701	2,070	18,631
1050620	277	4,476	4,038	2,340	6,894	440	1,403	0	0	0	12,300	0	441	3,825	707	0	225	0	37,089	0	37,089
1050621	07302	3,700	8,260	0	2,244	240	2,428	0	0	0	0	0	390	9,297	663	0	255	0	27,477	2,748	24,729
1050526	41601	15,639	63,705	9,750	30,071	5,520	29,319	0	0	8,620	0	0	5,350	47,184	2,775	0	1,305	0	219,238	23,842	195,396
1050616	277	5,567	14,160	0	17,506	6,555	0	0	0	0	0	0	522	26,426	1,293	0	405	0	72,434	7,243	65,191
1050618	08003	5,261	12,980	0	3,929	640	4,650	0	0	0	0	0	374	12,518	1,015	0	255	0	41,622	4,162	37,460
1050524	320	12,690	33,340	0	16,322	27,984	5,699	0	0	0	0	0	10,821	29,983	2,646	0	855	0	140,340	14,123	126,217
1050619	41601	7,437	37,900	0	26,154	7,722	10,738	0	0	0	0	0	2,342	36,638	968	0	900	0	130,799	0	130,799
1050621	17603	3,874	8,560	0	18,313	240	0	0	0	0	0	0	376	2,927	941	0	225	0	35,456	3,546	31,910
1050622	278	3,955	4,011	0	6,354	440	1,910	0	0	0	0	0	311	7,202	663	0	255	0	25,101	2,510	22,591
1050625	27202	1,921	2,019	0	2,153	240	214	0	0	0	0	0	183	2,075	355	0	150	0	9,310	931	8,379
1050625	41601	2,437	3,840	0	3,096	240	270	0	0	0	0	0	62	6,616	399	0	150	0	17,110	1,711	15,399
1050624	41602	2,274	5,020	0	3,238	0	30	0	0	0	0	0	260	725	487	0	150	0	12,184	1,218	10,966
1050622	47701	6,189	23,920	0	4,589	400	1,230	14,166	0	0	0	6,075	2,786	5,620	704	0	330	0	66,009	6,601	59,408
1050626	206	2,274	4,720	0	5,721	4,800	517	0	0	0	0	0	172	799	440	0	150	0	19,593	1,959	17,634
1050527	46801	5,351	38,400	1,020	72,776	5,400	35,627	128,992	0	19,285	0	9,717	61,397	20,562	616	0	1,275	0	400,418	0	381,935
1050602	47501	2,801	6,400	0	9,824	4,800	6,174	0	0	7,890	0	0	2,859	8,529	176	0	255	0	49,708	0	49,708
1050524	41601	7,125	18,052	2,730	17,679	440	13,999	0	0	1,320	0	0	3,970	20,197	883	0	480	0	86,875	0	86,875
1050529	47501	5,924	32,000	1,560	10,009	640	14,770	0	0	0	0	0	785	14,839	528	0	300	0	81,355	8,136	73,219
1050531	41601	4,273	13,400	340	14,149	8,182	3,602	0	0	4,620	0	0	368	13,325	311	0	330	0	62,900	0	62,900
1050602	01405	4,043	13,980	390	6,324	11,500	6,686	0	0	0	0	0	233	2,389	352	0	450	0	46,347	0	46,347
1050414	41601	12,092	94,320	8,080	29,056	7,155	19,317	0	1,600	49,440	0	0	16,153	92,631	1,672	0	2,625	0	334,141	0	334,141
1050604	41601	4,600	13,400	0	17,142	7,442	3,215	0	0	0	0	0	2,780	4,582	355	0	450	0	53,966	5,397	48,569
1050602	47501	5,826	32,000	1,120	43,309	12,180	15,053	2,081	0	25,010	3,960	0	31,262	42,941	575	0	900	0	216,217	21,622	194,595
1050606	41601	4,977	25,900	1,170	11,907	440	4,602	0	0	10,290	0	0	1,203	26,759	487	0	930	0	88,665	0	88,665
1050606	00201	6,269	38,400	680	21,536	9,122	17,376	31,897	0	10,220	0	8,221	29,997	10,781	616	0	1,005	0	186,120	0	186,120
1050526	41601	16,029	110,280	4,290	42,395	10,042	42,421	7,153	0	0	0	5,955	8,234	36,659	1,719	0	1,905	0	287,082	0	287,082
1050527	41601	11,379	46,460	5,850	25,300	6,640	21,382	0	0	2,640	0	0	3,742	49,972	1,631	0	885	0	175,881	0	175,881
1050527	47501	16,634	115,800	6,240	52,927	14,620	39,349	2,081	0	11,690	7,920	0	35,304	139,650	1,763	0	2,775	0	446,753	31,000	415,753
1050609	41601	8,886	51,200	0	24,360	1,480	21,403	0	0	20,685	0	0	8,470	49,138	792	0	1,605	0	188,019	0	188,019
1050615	41601	3,605	12,800	0	3,594	720	2,755	0	0	0	0	0	2,492	1,065	311	0	450	0	27,792	0	27,792
1050619	41601	4,576	6,400	0	8,993	6,675	4,042	0	0	0	0	0	3,313	5,330	176	0	255	0	39,760	3,976	35,784
1050614	47501	7,807	44,800	0	20,714	1,120	23,215	0	0	7,490	0	0	7,445	22,033	704	0	1,425	0	136,753	0	136,753
1050617	41501	5,212	25,600	0	37,060	1,320	13,557	19,578	0	56,965	5,280	5,955	41,345	44,106	440	0	930	0	257,348	25,735	231,613
1050620	47501	4,981	12,800	0	20,817	640	9,156	0	0	4,620	0	0	11,822	14,147	264	0	405	0	79,652	7,965	71,687
1050619	41601	4,620	10,240	0	12,276	8,082	5,104	0	0	5,320	8,200	0	3,486	3,075	487	0	1,005	0	61,895	0	61,895
1050617	41501	5,928	13,780	0	11,948	6,787	7,484	9,789	0	1,320	1,320	6,075	11,190	24,486	707	0	375	0	101,189	0	101,189
1050613	47501	12,009	76,800	1,560	26,206	14,237	28,450	0	0	2,370	0	0	5,395	37,050	1,144	0	2,205	0	207,426	0	207,426
1050620	47501	6,269	38,400	1,950	13,345	5,200	17,318	0	0	0	0	0	2,619	11,278	528	0	750	0	97,657	9,766	87,891
1050626	47501	1,997	6,400	0	6,287	480	3,120	0	0	1,495	0	0	75	7,050	88	0	225	0	27,217	2,722	24,495
1050613	41601	9,979	50,700	1,950	45,162	1,680	22,647	4,162	0	43,070	18,900	0	49,601	57,665	1,191	0	1,605	0	308,312	0	308,312
1050625	01405	2,647	3,540	730	6,435	11,500	5,310	0	0	0	0	0	129	2,257	311	0	330	0	33,189	0	33,189
1050514	YYY	7,074	10,314	0	13,242	6,155	6,642	45,674	0	0	0	10,035	9,799	7,799	1,584	0	300	0	118,618	0	118,618
1050504	14805	11,791	33,040	0	17,790	7,642	15,085	28,427	0	2,640	0	21,255	7,223	61,378	5,929	0	3,195	0	215,395	0	215,395
1050520	YYY	4,956	14,160	0	10,195	200	5,112	39,047	0	12,160	0	19,605	8,154	4,632	880	0	225	0	119,326	0	119,326
1050522	YYY	4,250	5,730	0	12,011	200	4,269	29,800	0	0	0	17,955	3,181	2,547	792	0	225	0	80,960	8,096	72,864
1050522	YYY	3,883	11,800	0	11,752	200	5,171	39,375	0	0	0	10,035	9,202	7,307	968	0	300	0	99,993	0	99,993
1050514	191	7,441	21,240	0	16,112	400	10,722	40,916	0	15,500	0	19,605	4,949	7,336	1,584	0	450	0	146,255	0	146,255
1050530	208	1,059	2,360	0	1,106	1,400	1,495	0	0	0	0	0	11,988	111	264	0	75	0	19,858	1,986	17,872
1050529	YYY	1,779	3,540	0	6,202	200	770	17,125	0	0	0	8,715	1,116	284	264	0	75	0	40,070	0	40,070
1050530	177	3,185	1,146	0	4,724	7,202	30	0	0	0	0	0	169	3,791	264	0	75	0	20,586	2,059	18,527
1050519	41601	7,597	15,340	0	16,062	8,242	13,023	0	0	4,930	0	0	7,989	18,094	1,279	0	525	0	93,081	9,308	83,773
1050529	181	2,790	4,720	0	2,347	7,202	58	0	0	0	0	0	171	1,143	399	0	150	0	18,980	0	18,980
1050529	YYY	1,765	4,720	0	5,562	200	657	25,490	0	0	0	7,395	465	269	440	0	75	0	47,038	4,704	42,334
1050529	YYY	2,499	4,720	0	11,856	7,800	1,510	0	0	0	0	0	24,849	448	352	0	75	0	54,109	0	54,109
1050519	309	6,015	17,700	0	11,537	860	5,965	47,577	0	0	0	27,855	5,949	4,086	1,320	0	150	0	129,014	12,901	116,113
1050522	20001	5,286	12,980	0	5,809	240	24,435	17,916	0	0	0	8,715	3,403	3,333	1,103	0	375	0	83,595	8,360	75,235
1050528	YYY	2,801	5,900	0	4,439	7,442	40	0	0	0	0	0	50	365	575	0	75	0	21,687	2,169	19,518
1050519	196	6,993	17,700	0	6,565	7,442	3,487	40,347	0	0	0	10,035	1,238	8,401	1,367	0	450	0	104,025	0	104,025
1050530	YYY	2,132	4,720	0	20,594	200	234	7,240	0	0	0	7,395	756	175	352	0	75	0	43,873	0	43,873
1050530	YYY	2,132	4,720	0	23,369	200	647	8,866	320	0	0	7,395	633	503	352	0	75	0	49,212	0	49,212
1050526	150	3,997	4,584	0	3,777	7,442	4,239	19,691	0	0	0	6,845	730	3,664	792	0	150	0	55,911	5,591	50,320
1050527	207	3,191	7,653	0	3,540	200	26,333	0	0	0	0	0	4,757	1,055	616	0	150	0	47,495	4,750	42,745
1050529	YYY	2,118	5,900	0	1,610	20,450	1,214	0	0	0	0	0	19,541	4,970	440	0	150	0	56,393	0	56,393
1050531	171	1,412	3,540	0	1,100	200	124	10,119	0	0	0	8,715	8,027	347	264	0	75	0	33,923	3,392	30,531
1050526	46802	4,745	8,560	0	1,324	8,996	4,252	8,574	2,535	0	0	6,075	2,069	826	751	0	75	0	48,782	4,878	43,904
1050529	18803	3,902	5,900	0	2,345	10,716	2,327	0	0	0	0	0	94	2,091	487	0	150	0	28,012	2,801	25,211
1050529	183	2,641	3,840	0	2,719	7,442	0	0	0	0	0	0	250	2,187	443	0	150	0	19,672	1,967	17,705
1050528	YYY	2,471	7,080	0	2,660	20,450	920	0	0	0	0	0	19,000	3,127	528	0	150	0	56,386	0	56,386
1050527	14801	2,824	8,260	0	4,842	200	1,869	19,382	0	970	0	8,715	810	2,323	704	0	225	0	51,124	5,112	46,012
1050307	YYY	10,590	16,617	11,310	2,940	1,870	2,259	0	0	0	0	0	1,187	2,583	2,640	0	225	0	52,221	0	52,221
1050520	WWW	5,648	17,700	0	8,667	20,450	1,150	0	0	10,290	0	0	22,785	6,502	1,408	0	300	0	94,900	0	94,900
1050521	YYY	8,183	47,840	730	31,656	12,500	13,480	69,687	0	21,370	0	29,385	40,301	14,147	1,144	0	525	0	290,948	0	290,948
1050525	15404	5,070	5,730	0	7,936	7,442	3,631	28,120	0	0	0	6,845	1,115	8,816	968	0	300	0	75,973	7,597	68,376
1050525	YYY	3,883	11,800	0	13,122	6,355	3,691	45,674	0	0	0	11,355	10,613	2,907	792	0	225	0	110,417	0	110,417
1050602	309	2,966	2,326	390	2,651	440	3,532	8,319	0	0	0	10,035	3,854	4,306	352	0	150	0	39,321	0	39,321
1050603	266	1,059	2,360	0	1,954	200	124	2,681	0	0	0	2,550	32	162	176	0	75	0	11,373	1,137	10,236
1050529	208	3,714	6,200	0	7,858	11,379	750	0	0	0	0	0	3,225	10,599	619	0	225	0	44,569	4,457	40,112
1050522	14601	5,295	16,520	0	13,298	400	10,697	43,682	0	0	0	10,035	14,504	6,949	1,320	0	300	0	123,000	12,300	110,700
1050519	YYY	6,721	20,060	0	10,202	200	10,944	39,375	0	0	0	13,005	15,575	7,613	1,496	0	375	0	125,566	0	125,566
1050527	YYY	3,530	10,620	0	6,343	200	3,088	43,682	0	0	0	11,355	20,418	4,431	792	0	225	0	104,684	0	104,684
1050604	261	706	1,180	0	2,741	200	124	5,711	0	0	0	6,075	39	88	176	0	75	0	17,115	1,712	15,403
1050603	20401	1,426	2,360	0	1,300	6,155	0	0	0	0	0	0	16	20	88	0	0	0	11,365	1,137	10,228
1050602	YYY	1,412	1,719	0	9,681	200	117	11,171	0	0	0	6,075	52	376	352	0	150	0	31,305	0	31,305
1050522	309	5,662	16,520	0	8,239	200	5,587	41,951	0	0	0	13,005	1,907	4,787	1,232	0	375	0	99,465	9,947	89,518
1050602	170	2,132	4,720	0	2,770	200	2,035	15,776	0	0	8,200	6,075	567	371	440	0	150	0	43,436	0	43,436
1050529	14901	3,177	9,440	0	8,716	400	3,453	45,674	0	0	0	8,715	6,984	6,073	792	0	225	0	93,649	9,365	84,284
1050601	183	2,743	4,720	0	3,406	7,202	0	0	0	0	0	0	207	6,919	487	0	150	0	25,834	2,583	23,251
1050605	YYY	706	1,180	0	1,230	11,700	0	0	0	0	0	0	0	0	0	0	0	0	14,816	0	14,816
1050529	195	3,544	9,440	0	7,721	200	3,507	40,347	0	0	0	13,005	5,150	3,707	704	0	225	0	87,550	8,755	78,795
1050523	14802	6,698	17,700	0	7,374	7,442	12,344	54,100	0	0	0	12,829	2,302	10,182	1,408	0	375	0	132,754	13,275	119,479
1050606	26202	706	573	0	5,549	200	77	5,711	0	0	0	6,075	35	175	176	0	75	0	19,352	1,935	17,417
1050603	YYY	1,765	4,720	0	2,550	20,450	1,617	0	0	0	0	0	21,006	5,106	352	0	150	0	57,716	0	57,716
1050601	39803	3,969	7,080	0	4,213	7,442	30	0	0	1,320	0	0	186	2,583	616	0	225	0	27,664	2,766	24,898
1050604	085	1,779	3,540	0	1,700	400	2,880	0	0	0	0	0	1,915	879	352	0	150	0	13,595	0	13,595
1050605	47702	1,059	2,360	0	2,114	200	124	8,750	0	0	0	6,075	40	309	176	0	75	0	21,282	2,128	19,154
1050604	261	1,779	3,540	0	3,728	200	521	8,866	560	0	0	6,075	626	293	352	0	75	0	26,615	2,662	23,953
1050509	YYY	12,551	38,617	8,140	25,254	8,482	18,297	45,836	1,440	2,640	0	12,885	4,284	15,250	4,795	0	2,505	0	200,976	0	200,976
1050604	181	2,288	3,540	0	2,043	7,682	195	0	0	0	0	0	220	2,372	399	0	150	0	18,889	1,889	17,000
1050526	YYY	5,981	14,160	0	7,366	7,442	7,708	38,062	0	0	0	13,005	10,585	8,406	1,191	0	375	0	114,281	0	114,281
1050528	YYY	4,970	12,980	0	11,777	400	8,023	56,999	0	0	0	19,605	9,639	7,992	968	0	300	0	133,653	0	133,653
1050515	YYY	10,277	30,262	0	23,741	600	13,492	37,630	0	2,370	0	16,185	10,988	22,784	6,410	0	3,810	0	178,549	0	178,549
1050602	YYY	2,824	8,260	0	1,380	7,800	1,167	0	0	0	0	0	23,798	591	704	0	150	0	46,674	0	46,674
1050528	YYY	4,956	14,160	0	7,617	7,385	6,360	43,682	0	0	0	8,715	5,252	6,503	1,144	0	225	0	105,999	0	105,999
1050527	YYY	6,755	21,740	0	19,026	6,355	15,379	61,721	0	1,320	0	34,455	42,942	6,507	1,232	0	375	0	217,807	0	217,807
1050603	YYY	3,558	8,260	0	11,440	7,385	0	0	0	0	0	0	169	2,266	616	0	225	0	33,919	0	33,919
1050603	18805	3,191	4,011	0	4,092	200	2,230	0	0	8,350	0	0	2,771	25,383	704	0	225	0	51,157	0	51,157
1050529	YYY	4,956	14,160	0	9,123	200	5,240	50,925	0	0	0	17,955	34,904	5,188	1,056	0	300	0	144,007	0	144,007
1050605	YYY	2,852	2,865	0	5,822	200	817	17,125	560	0	0	10,035	1,299	1,009	440	0	150	0	43,174	0	43,174
1050504	089	15,716	42,780	0	19,486	87,837	8,909	0	0	8,970	0	0	4,940	31,725	3,303	0	975	0	224,641	0	224,641
1050604	208	2,994	6,200	0	3,233	4,560	1,906	0	0	0	0	0	2,202	5,281	575	0	150	0	27,101	2,710	24,391
1050605	YYY	2,485	5,900	0	7,703	200	1,457	17,125	560	0	0	11,355	1,307	465	440	0	75	0	49,072	0	49,072
1050607	YYY	2,132	4,720	0	20,454	200	881	17,125	560	0	0	8,715	1,200	430	440	0	75	0	56,932	0	56,932
1050603	14805	3,177	9,440	0	5,205	200	1,245	28,044	0	0	0	13,005	1,346	4,211	792	0	150	0	66,815	0	66,815
1050430	YYY	16,436	28,042	1,170	57,517	23,165	20,564	27,754	0	0	0	19,080	24,116	56,336	11,418	0	6,750	0	292,348	0	292,348
1050525	YYY	7,088	20,060	0	22,113	6,155	8,798	58,075	0	1,590	0	19,605	25,750	8,683	1,408	0	450	0	179,775	0	179,775
1050607	208	2,288	3,540	0	3,039	12,626	500	0	0	0	0	0	3,060	5,607	399	0	150	0	31,209	3,121	28,088
1050611	270	706	1,180	0	2,611	200	77	5,158	0	0	0	6,075	83	230	176	0	75	0	16,571	1,657	14,914
1050608	YYY	1,765	2,292	0	2,190	11,600	1,510	0	0	0	0	0	24,199	449	352	0	75	0	44,432	0	44,432
1050531	18905	5,734	12,980	0	6,306	8,082	1,565	0	0	0	0	0	2,009	5,436	1,059	0	300	0	43,471	4,347	39,124
1050603	YYY	3,530	10,620	0	3,641	200	3,377	27,814	0	0	0	7,395	1,311	4,097	880	0	300	0	63,165	0	63,165
1050610	ZZZ	1,059	2,360	0	1,954	200	160	3,674	0	0	0	5,580	111	430	176	0	75	0	15,779	1,578	14,201
1050604	YYY	4,278	9,440	0	2,940	200	495	14,393	0	2,640	0	6,075	638	1,999	704	0	225	0	44,027	0	44,027
1050608	183	3,110	4,720	0	2,448	7,442	28	0	0	0	0	0	203	4,464	440	0	150	0	23,005	2,301	20,704
1050417	182	9,687	23,600	780	10,090	440	2,631	0	2,240	1,320	41,000	0	1,137	20,262	1,936	0	375	0	115,498	0	115,498
1050608	18805	2,529	4,720	0	784	480	195	0	0	0	0	0	161	796	487	0	150	0	10,302	1,030	9,272
1050607	207	4,244	5,900	0	9,780	18,702	0	0	0	0	0	0	274	2,418	575	0	180	0	42,073	4,207	37,866
1050601	171	5,423	12,980	0	5,146	7,442	4,215	19,016	0	0	0	16,569	2,227	29,830	1,103	0	375	0	104,326	10,433	93,893
1050606	151	3,507	7,653	0	2,562	7,202	554	19,691	0	0	0	6,845	289	2,491	663	0	225	0	51,682	5,168	46,514
1050610	YYY	1,412	3,540	0	1,740	7,800	1,120	0	0	0	0	0	23,345	160	264	0	0	0	39,381	0	39,381
1050610	YYY	1,765	4,720	0	3,838	200	434	15,187	0	0	0	6,075	45	380	440	0	75	0	33,159	0	33,159
1050606	207	3,700	8,560	0	4,637	6,195	30	0	0	5,145	0	0	411	2,167	751	0	225	0	31,821	0	31,821
1050531	WWW	6,726	15,340	0	22,911	1,040	180	0	0	0	0	0	658	2,824	1,191	0	225	0	51,095	0	51,095
1050603	YYY	4,603	12,980	0	18,523	400	5,191	36,719	0	11,730	0	13,005	13,737	5,682	880	0	225	0	123,675	0	123,675
1050524	YYY	7,766	19,924	0	20,502	11,700	4,346	56,371	0	8,080	0	16,305	19,413	8,845	1,848	0	375	0	175,475	0	175,475
1050611	YYY	1,412	1,719	0	7,666	200	1,068	19,099	0	0	0	7,395	50	350	352	0	75	0	39,386	0	39,386
1050602	YYY	5,323	14,160	0	7,922	760	5,408	43,682	0	0	0	8,715	8,804	5,637	1,144	0	375	0	101,930	0	101,930
1050603	WWW	7,456	33,860	0	27,583	1,320	2,735	0	0	0	0	0	3,221	24,719	1,056	0	555	0	102,505	0	102,505
1050611	181	1,742	2,660	0	4,084	7,442	123	0	0	0	0	0	91	589	311	0	75	0	17,117	1,712	15,405
1050604	292	5,289	10,920	0	16,308	7,202	6,635	7,708	0	0	0	6,075	881	8,580	927	0	255	0	70,780	7,078	63,702
1050608	183	3,888	3,438	0	3,667	7,202	120	0	0	0	0	0	282	10,018	575	1,031	225	0	30,446	3,045	27,401
1050610	208	3,157	4,720	0	4,845	7,202	721	0	0	0	0	0	308	3,008	399	0	150	0	24,510	2,451	22,059
1050612	YYY	1,412	3,540	0	3,938	200	379	15,187	0	0	0	7,395	57	194	352	0	150	0	32,804	0	32,804
1050507	49302	17,024	52,332	0	25,078	24,950	17,157	19,708	0	2,640	0	16,305	21,167	42,548	3,432	0	885	0	243,226	27,881	215,345
1050613	WWW	1,059	1,146	0	12,385	200	507	0	0	0	0	0	694	117	176	0	75	0	16,359	0	16,359
1050604	197	4,603	12,980	0	5,952	200	6,185	17,916	0	0	0	13,005	6,690	17,298	1,056	0	330	0	86,215	8,622	77,593
1050610	198	2,118	5,900	0	2,434	200	856	17,916	0	0	0	7,395	5,838	1,129	440	0	150	0	44,376	4,438	39,938
1050430	YYY	21,244	89,640	2,530	28,314	8,442	29,534	56,590	0	795	0	21,226	6,201	27,483	6,244	0	2,805	0	301,048	0	301,048
1050601	182	6,287	15,340	0	8,493	920	594	0	1,520	0	0	0	459	5,594	1,279	0	375	0	40,861	0	40,861
1050608	48601	4,729	18,700	0	1,672	5,592	5,149	7,033	0	0	0	6,075	5,454	2,614	704	0	150	0	57,872	5,787	52,085
1050610	207	2,815	4,720	0	3,188	5,424	672	0	0	0	0	0	2,102	3,239	399	0	150	0	22,709	2,271	20,438
1050604	WWW	4,956	14,160	0	17,508	400	141	2,081	0	8,670	0	0	1,706	13,825	1,144	0	375	0	64,966	0	64,966
1050611	183	3,249	5,900	0	2,882	7,442	0	0	0	0	0	0	256	3,885	528	0	150	0	24,292	2,429	21,863
1050527	YYY	9,936	45,660	0	27,394	9,670	13,856	39,047	0	38,900	0	34,335	18,364	17,159	1,672	0	1,050	0	257,043	0	257,043
1050614	YYY	1,412	3,540	0	10,586	200	1,258	25,490	0	0	0	29,505	2,715	350	264	0	75	0	75,395	0	75,395
1050608	YYY	3,530	10,620	0	17,933	400	5,435	43,948	0	2,370	0	14,655	9,672	5,335	792	0	225	0	114,915	0	114,915
1050611	48601	3,519	16,340	0	3,527	31,502	1,466	0	0	1,320	0	0	28,478	447	575	0	300	0	87,474	8,747	78,727
1050611	WWW	3,205	7,080	0	3,410	0	99	0	0	0	0	0	183	15,823	616	0	225	0	30,641	0	30,641
1050605	195	4,589	14,160	0	15,204	400	2,415	40,347	0	0	0	10,035	6,184	5,812	1,144	0	375	0	100,665	10,067	90,598
1050605	YYY	6,373	14,160	0	9,790	7,202	4,983	45,525	0	2,640	0	18,439	2,663	8,199	1,144	0	375	0	121,493	0	121,493
1050613	YYY	2,132	4,720	0	17,850	200	505	8,866	320	0	0	8,715	1,099	456	352	0	75	0	45,290	0	45,290
1050603	YYY	6,029	8,629	0	7,673	200	4,608	43,682	0	0	0	13,005	23,936	4,596	1,232	0	300	0	113,890	0	113,890
1050612	171	2,729	5,900	0	2,991	7,202	1,118	10,733	0	0	0	6,075	796	1,730	528	0	150	0	39,952	3,995	35,957
1050523	YYY	13,159	58,756	0	32,712	1,000	15,213	52,938	1,520	3,690	0	21,135	19,672	66,028	8,735	0	5,715	0	300,273	0	300,273
1050609	150	4,717	10,620	0	1,394	7,202	4,283	16,463	0	0	0	6,075	1,018	4,175	839	0	225	0	57,011	0	57,011
1050613	YYY	2,485	5,900	0	17,622	200	4,351	52,837	560	0	0	24,555	14,754	1,433	718	0	150	0	125,565	0	125,565
1050609	YYY	3,530	10,620	0	9,524	200	2,251	45,674	0	0	0	13,005	6,019	4,171	880	0	225	0	96,099	0	96,099
1050614	YYY	2,132	4,720	0	13,684	200	505	17,125	560	0	0	7,395	641	295	630	0	150	0	48,037	0	48,037
1050606	14801	4,589	14,160	0	4,114	200	4,165	16,050	0	0	0	6,075	1,168	5,685	1,144	0	300	0	57,650	0	57,650
1050611	181	3,347	7,380	0	3,106	7,402	195	0	0	0	0	0	231	7,220	575	0	225	0	29,681	2,968	26,713
1050524	YYY	11,678	49,500	0	22,287	32,902	9,378	59,971	0	0	0	12,885	13,460	13,625	2,203	0	675	0	228,564	0	228,564
1050617	26702	706	1,180	0	2,898	200	324	11,539	0	0	0	2,550	33	390	176	0	75	0	20,071	2,007	18,064
1050613	YYY	2,485	5,900	0	10,264	0	612	17,125	320	0	0	8,715	1,088	222	440	0	75	0	47,246	0	47,246
1050603	YYY	5,323	12,980	0	13,742	19,125	2,583	14,186	0	0	0	6,075	5,329	3,104	1,144	0	375	0	83,966	8,397	75,569
1050617	171	1,059	2,360	0	2,820	200	105	14,827	0	0	0	2,550	78	208	176	0	75	0	24,458	2,446	22,012
1050614	YYY	2,485	5,900	0	7,325	17,855	728	0	0	0	0	0	2,545	5,363	1,054	0	630	0	43,885	4,389	39,496
1050616	182	2,804	1,719	0	2,016	7,442	0	0	0	0	0	0	373	1,414	311	0	150	0	16,229	1,623	14,606
1050616	YYY	1,779	3,540	0	20,594	200	347	8,866	0	0	0	7,395	132	773	542	0	150	0	44,318	0	44,318
1050617		3,553	19,200	0	3,602	7,442	2,467	0	0	0	0	0	2,784	5,061	264	0	225	0	44,598	4,460	40,138
1050613	198	2,471	7,080	0	2,434	200	2,481	17,916	0	0	0	13,005	8,079	2,441	616	0	225	0	56,948	5,695	51,253
1050607	YYY	4,956	14,160	0	10,632	200	5,831	30,646	0	0	0	21,255	17,528	6,721	968	0	300	0	113,197	0	113,197
1050531	YYY	8,161	22,420	1,700	9,726	200	10,861	34,333	0	1,320	0	16,305	15,307	3,933	1,408	0	450	0	126,124	0	126,124
1050606	YYY	5,309	15,340	0	11,984	200	6,822	39,375	0	0	0	22,905	12,923	6,181	1,056	0	300	0	122,395	0	122,395
1050613	18905	4,583	8,260	0	1,983	7,442	188	0	0	0	0	0	299	3,283	704	0	225	0	26,967	2,697	24,270
1050616	YYY	1,765	4,720	0	6,616	200	548	19,099	0	0	0	7,395	88	314	352	0	75	0	41,172	0	41,172
1050610	14802	5,275	11,800	0	5,093	8,887	3,813	23,141	0	0	0	7,395	1,287	7,200	968	0	300	0	75,159	7,516	67,643
1050606	YYY	5,295	8,022	0	13,772	11,700	4,314	31,273	0	0	0	10,035	4,106	2,873	792	0	255	0	92,437	0	92,437
1050606	YYY	5,662	16,520	0	11,713	11,900	6,686	40,290	0	6,600	0	11,355	10,384	2,502	968	0	300	0	124,880	0	124,880
1050616	WWW	3,524	4,720	0	3,796	240	918	0	0	0	0	0	275	9,456	440	0	150	0	23,519	0	23,519
1050615	463	2,627	5,900	0	0	0	1,185	0	0	0	0	0	0	32	528	0	0	0	10,272	0	10,272
1050610	YYY	5,126	11,800	0	6,664	840	4,993	38,062	0	0	0	10,035	3,903	4,447	927	0	300	0	87,097	0	87,097
1050617	YYY	1,412	3,540	0	2,990	20,450	1,214	0	0	0	0	0	18,886	2,504	264	0	75	0	51,335	0	51,335
1050527	YYY	10,269	43,980	0	14,887	1,000	17,072	53,180	0	0	0	24,435	24,285	9,641	2,112	0	1,050	0	201,911	0	201,911
1050617	YYY	1,779	3,540	0	18,932	200	738	20,769	560	0	0	7,395	387	711	264	0	75	0	55,350	0	55,350
1050608	48701	9,023	50,700	0	13,352	32,302	8,301	0	0	3,960	0	0	20,366	13,237	1,144	0	375	0	152,760	0	152,760
1050619	YYY	1,426	2,360	0	1,450	6,155	0	0	0	0	0	0	76	139	88	0	75	0	11,769	0	11,769
1050527	YYY	9,508	28,620	0	9,939	9,287	615	0	0	0	0	0	6,183	30,737	6,501	0	4,485	0	105,875	0	105,875
1050618	208	2,451	2,360	0	3,270	12,386	469	0	0	0	0	0	2,015	3,464	311	0	75	0	26,801	0	26,801
1050620	26202	706	1,180	0	2,841	200	107	5,711	0	0	0	6,075	76	169	176	0	75	0	17,316	1,732	15,584
1050608	YYY	5,309	15,340	0	7,637	200	6,557	47,249	0	0	0	27,855	14,555	4,464	1,056	0	225	0	130,447	0	130,447
1050613	YYY	3,897	10,620	0	6,832	11,700	7,467	45,674	0	0	0	13,005	18,067	4,217	792	0	225	0	122,496	0	122,496
1050608	YYY	5,295	8,022	0	4,808	200	3,651	27,581	0	0	0	11,355	4,708	2,775	1,144	0	300	0	69,839	0	69,839
1050620	YYY	1,059	2,360	0	1,240	7,800	1,227	0	0	0	0	0	23,358	1,312	264	0	75	0	38,695	0	38,695
1050617	YYY	2,485	2,865	0	9,864	200	706	17,125	560	0	0	6,075	1,118	192	528	0	75	0	41,793	0	41,793
1050614	183	4,773	10,620	0	5,822	5,040	94	0	0	0	0	0	632	3,590	839	0	300	0	31,710	3,171	28,539
1050529	YYY	17,797	121,700	2,020	43,565	3,925	53,703	50,518	1,520	8,000	0	17,835	11,426	51,149	3,647	0	3,825	0	390,630	0	390,630
1050619	YYY	1,765	4,720	0	1,400	15,400	1,021	0	0	0	0	0	71,304	346	352	0	150	0	96,458	0	96,458
1050621	171	1,059	2,360	0	1,100	200	173	10,119	0	0	0	8,715	4,887	223	176	0	75	0	29,087	2,909	26,178
1050610	17404	9,109	42,620	0	15,280	8,462	6,835	0	0	2,370	0	0	2,587	30,418	1,320	0	1,305	0	120,306	12,031	108,275
1050617	YYY	3,191	8,260	0	25,610	200	1,031	8,866	880	0	0	10,035	1,148	321	806	1,031	75	0	61,454	0	61,454
1050611	269	8,145	24,930	0	12,205	32,392	8,062	7,708	0	14,560	0	7,275	29,427	2,632	1,232	0	600	0	149,168	14,917	134,251
1050618	170	2,471	7,080	0	4,028	200	3,209	11,709	0	0	0	7,395	213	2,403	616	0	150	0	39,474	0	39,474
1050225	YYY	21,180	70,800	0	15,373	13,165	46,539	14,393	5,040	0	0	11,355	34,737	109,996	23,890	0	15,750	0	382,218	0	382,218
1050611	YYY	6,043	15,340	0	11,799	200	10,001	41,339	0	0	0	19,605	11,826	4,370	1,232	0	375	0	122,130	0	122,130
1050619	181	3,154	7,080	0	3,007	7,642	990	0	0	0	0	0	171	825	575	0	225	0	23,669	2,367	21,302
1050622	181	1,670	1,480	0	1,583	7,682	0	0	0	0	0	0	160	325	223	0	300	0	13,423	0	13,423
1050619	192	2,471	7,080	0	5,718	6,155	2,727	14,485	0	0	0	8,715	1,261	3,021	616	0	225	0	52,474	0	52,474
1050530	YYY	13,871	72,440	0	32,679	1,400	24,501	67,745	0	6,840	0	17,835	17,677	51,909	6,469	0	3,810	0	317,176	0	317,176
1050614	20401	4,566	11,800	0	3,018	480	0	0	0	0	0	0	175	3,793	1,015	0	300	0	25,147	0	25,147
1050617	18805	3,700	4,311	0	7,456	7,202	1,408	0	0	0	0	0	3,369	10,722	751	0	225	0	39,144	3,914	35,230
1050620	18905	3,154	7,080	0	3,374	8,912	195	0	0	0	0	0	316	2,236	616	0	225	0	26,108	2,611	23,497
1050623	YYY	1,779	3,540	0	20,276	200	446	7,240	0	0	0	6,075	121	442	542	0	75	0	40,736	0	40,736
1050622	08402	3,182	4,720	0	1,080	6,536	1,816	0	0	0	0	0	282	407	399	0	150	0	18,572	1,857	16,715
1050616	46801	6,390	10,620	0	2,996	8,300	9,100	34,633	815	0	0	19,850	13,677	3,217	927	0	330	0	110,855	11,086	99,769
1050619	208	3,874	8,260	1,900	3,290	12,386	6,931	0	0	0	0	0	2,176	9,116	663	0	225	0	48,821	4,882	43,939
1050624	171	1,059	2,360	0	1,100	200	355	10,119	0	0	0	10,035	7,039	340	264	0	75	0	32,946	3,295	29,651
1050625	266	706	1,180	0	1,884	200	345	5,158	0	0	0	2,550	75	174	176	0	75	0	12,523	1,252	11,271
1050619	261	2,824	8,260	0	4,882	200	3,028	9,497	0	0	0	6,075	645	699	616	0	75	0	36,801	3,680	33,121
1050618	181	5,140	10,620	0	5,389	7,642	784	0	0	0	0	0	535	9,659	880	1,031	225	0	41,905	0	41,905
1050622	181	3,096	5,900	0	2,321	7,642	183	0	0	0	0	0	280	1,677	528	0	150	0	21,777	2,178	19,599
1050530	YYY	6,538	10,818	0	8,382	680	1,276	14,393	0	1,320	0	6,075	728	5,115	1,323	0	600	0	57,248	0	57,248
1050624	YYY	1,412	3,540	0	10,772	200	93	7,240	0	0	0	6,075	40	234	264	0	75	0	29,945	0	29,945
1050609	YYY	8,052	21,240	0	20,254	7,642	5,416	79,913	0	0	0	30,630	16,172	4,927	1,672	0	450	0	196,368	0	196,368
1050625	18904	1,823	2,360	0	10,454	7,442	0	0	0	0	0	0	190	1,162	311	0	75	0	23,817	2,382	21,435
1050606	WWW	10,981	17,011	0	21,945	14,177	2,079	0	0	0	0	0	772	34,174	1,854	0	630	0	103,623	0	103,623
1050604	194	8,825	13,752	0	10,779	400	7,139	30,902	0	0	0	19,605	2,501	15,802	3,954	0	1,740	0	115,399	11,540	103,859
1050626	47902	1,059	1,146	0	2,074	200	274	13,892	0	0	0	6,075	42	444	264	0	75	0	25,545	2,555	22,990
1050621	177	3,333	8,260	0	3,168	7,642	123	0	0	0	0	0	280	2,608	704	0	225	0	26,343	2,634	23,709
1050627	266	706	573	0	2,114	200	124	5,158	0	0	0	6,075	32	188	176	0	75	0	15,421	1,542	13,879
1050621	15502	3,177	9,440	0	15,754	200	4,610	40,259	0	0	0	19,605	16,153	6,502	792	0	225	0	116,717	0	116,717
1050409	18804	4,256	9,091	6,070	4,269	400	10,154	0	1,280	0	0	0	278	7,462	836	0	300	0	44,396	4,440	39,956
1050610	YYY	7,794	10,887	0	8,914	6,155	9,333	39,375	0	0	0	8,715	1,519	7,796	1,672	0	375	0	102,535	0	102,535
1050624	YYY	2,118	5,900	0	3,953	200	2,025	15,187	0	0	0	7,395	59	508	528	0	150	0	38,023	0	38,023
1050626	261	1,412	3,540	0	4,582	200	370	14,977	0	0	0	7,395	1,079	159	264	0	75	0	34,053	3,405	30,648
1050624	YYY	2,118	5,900	0	1,530	7,800	1,120	0	0	0	0	0	24,639	92	352	0	75	0	43,626	0	43,626
1050627	YYY	1,059	2,360	0	1,190	11,600	1,680	0	0	0	0	0	23,778	90	176	0	75	0	42,008	4,201	37,807
1050626	YYY	1,412	3,540	0	1,380	7,800	1,510	0	0	0	0	0	23,358	276	264	0	75	0	39,615	0	39,615
1050617	YYY	4,589	14,160	0	15,444	6,155	8,563	31,273	0	5,010	0	17,955	9,889	3,680	1,056	0	300	0	118,074	0	118,074
1050509	46802	9,362	25,380	0	10,979	8,580	12,570	29,156	0	2,640	0	13,005	58,044	7,927	2,027	0	300	0	179,970	0	179,970
1050524	25601	5,671	25,100	0	2,939	6,608	5,120	0	0	0	0	0	201	1,769	792	0	450	0	48,650	4,865	43,785
1050602	02901	1,378	573	0	1,432	6,012	2,319	0	0	0	0	0	99	310	88	0	75	0	12,286	1,229	11,057
1050530	00201	4,247	12,800	680	5,275	4,540	12,478	38,337	0	4,820	0	11,213	26,834	6,406	311	0	450	0	128,391	12,839	115,552
1050524	500	4,250	11,800	0	2,914	200	2,065	28,422	0	0	0	14,655	4,157	1,624	968	0	150	0	71,205	7,121	64,084
1050530	01102	2,330	3,840	0	4,791	18,600	360	0	0	0	0	0	266	1,993	399	1,031	150	0	33,760	3,376	30,384
1050520	01402	7,405	26,960	0	2,380	28,317	1,000	0	0	0	0	0	3,828	6,439	1,279	0	600	0	78,208	0	78,208
1050528	497	2,471	7,080	0	2,814	650	1,868	42,073	0	0	0	14,655	21,932	1,863	616	0	150	0	96,172	9,617	86,555
1050526	02802	3,644	8,260	0	4,681	11,300	124	0	0	0	0	0	143	1,998	751	0	225	0	31,126	0	31,126
1050409	01401	8,492	15,360	8,190	2,355	3,800	23,745	0	7,600	0	0	0	1,668	15,468	1,892	0	150	0	88,720	0	88,720
1050511	YYY	10,307	27,140	0	26,034	22,810	9,811	54,895	4,440	0	0	12,829	8,237	11,293	2,302	0	450	0	190,548	0	190,548
1050517	46802	12,689	77,480	1,020	7,482	19,036	16,449	12,623	0	0	0	5,955	17,182	15,327	1,584	0	1,950	0	188,777	0	188,777
1050527	02702	3,888	7,080	0	2,504	5,050	315	0	0	0	0	0	55	603	663	0	75	0	20,233	0	20,233
1050603	01406	706	1,180	0	960	16,280	430	0	0	0	0	0	3,770	51	88	0	75	0	23,540	2,354	21,186
1050530	01402	3,345	16,340	0	3,113	4,800	1,182	0	0	0	0	0	130	689	528	0	300	0	30,427	0	30,427
1050527	500	3,177	9,440	0	3,614	200	1,544	34,612	0	0	0	8,715	4,151	2,414	792	0	225	0	68,884	6,888	61,996
1050528	233	3,496	7,080	0	4,978	24,408	550	0	0	3,085	0	0	1,098	1,298	663	0	150	0	46,806	4,681	42,125
1050530	025	2,683	5,020	0	2,296	4,800	1,000	0	0	0	0	0	257	6,736	399	0	150	0	23,341	2,334	21,007
1050524	02701	6,333	14,160	4,680	3,744	8,840	7,520	0	1,200	0	0	0	397	1,849	1,144	0	225	0	50,092	0	50,092
1050603	02902	1,470	1,180	0	684	6,480	263	0	0	0	0	0	50	276	135	0	75	0	10,613	1,061	9,552
1050603	YYY	1,215	1,180	0	768	18,702	30	0	0	0	0	0	93	301	135	0	75	0	22,499	0	22,499
1050602	025	2,161	2,660	0	4,242	8,040	2,155	0	0	0	0	0	124	762	223	0	75	0	20,442	2,044	18,398
1050529	500	3,544	9,440	0	2,409	6,700	2,265	28,422	0	0	0	7,395	3,670	825	704	0	150	0	65,524	6,552	58,972
1050530	02701	3,521	7,380	0	1,744	4,800	770	0	0	2,290	0	0	141	593	663	0	150	0	22,052	0	22,052
1050524	498	6,183	18,530	0	6,043	1,050	6,693	50,859	0	0	0	12,709	30,400	2,645	1,188	0	225	0	136,525	13,653	122,872
1050416	00201	7,072	16,395	6,630	5,187	3,800	17,224	32,512	3,440	1,320	0	20,309	38,570	8,530	1,496	0	300	0	162,785	0	162,785
1050604	00201	3,054	12,800	390	6,062	7,982	8,131	31,897	0	6,140	0	6,725	26,012	3,832	264	0	525	0	113,814	0	113,814
1050527	500	3,883	11,800	0	3,014	200	1,561	28,422	0	0	0	13,005	4,229	2,232	968	0	150	0	69,464	6,946	62,518
1050529	498	3,177	9,440	0	4,634	650	3,109	42,073	0	1,590	0	17,955	80,070	2,419	792	0	150	0	166,059	16,606	149,453
1050531	02902	3,521	7,380	0	6,204	5,040	1,656	0	0	0	0	0	231	709	663	0	150	0	25,554	2,555	22,999
1050531	02901	4,819	23,920	0	3,005	200	1,670	0	0	0	0	0	65	354	704	0	750	0	35,487	3,549	31,938
1050602	025	2,585	5,020	1,360	2,662	240	2,153	0	0	0	0	0	165	2,692	487	0	150	0	17,514	0	17,514
1050605	00904	1,742	2,360	0	1,080	1,644	1,942	0	0	0	0	0	108	467	264	0	75	0	9,682	968	8,714
1050607	01401	2,089	6,400	0	3,800	4,800	4,175	0	0	0	0	0	2,777	1,638	88	0	225	0	25,992	0	25,992
1050519	YYY	9,701	23,600	0	12,384	31,351	9,092	55,439	4,280	2,370	0	16,305	37,248	9,876	1,848	0	300	0	213,794	0	213,794
1050528	YYY	4,954	18,564	0	14,316	400	6,909	50,606	0	0	0	20,189	25,211	3,591	968	0	300	0	146,008	0	146,008
1050601	01402	4,721	23,920	0	4,677	8,800	2,775	0	0	0	0	0	548	3,976	704	0	825	0	50,946	0	50,946
1050506	00402	15,766	59,941	0	9,747	14,390	9,903	38,223	5,640	0	0	16,185	1,492	9,015	2,951	0	675	0	183,928	0	183,928
1050530	00102	4,974	26,280	780	12,745	6,555	9,176	64,466	0	0	0	18,319	20,218	6,987	880	0	225	0	171,605	17,161	154,444
1050519	00202	11,036	48,850	1,360	11,620	4,640	15,615	47,264	0	1,320	0	21,050	16,758	11,482	1,848	0	675	0	193,518	0	193,518
[truncated: 5,504 more rows]
